# Supplementary material
Source: publisher figshare collection journal article supplement (https://karger.figshare.com/ndownloader/files/8710171)
Supplement: Supplementary file 1 [file 8710171]

## Sheet: Differentially expressed genes
Supplementary Table 1. PMN genes differentially expressed following interaction with F. tularensis LVS
				3 hr				6 hr				12 hr				24 hr				48 hr					KEY
Affymtrix probeset	Gene title	Gene symbol	Entrez	ANOVA (0.000229538)	Avg ctrl	Avg LVS	LVS/ctrl	ANOVA (0.00258893)	Avg ctrl	Avg LVS	LVS/ctrl	ANOVA (0.00438409)	Avg ctrl	Avg LVS	LVS/ctrl	ANOVA (0.0160375)	Avg ctrl	Avg LVS	LVS/ctrl	ANOVA (0.0232922)	Avg ctrl	Avg LVS	LVS/ctrl		#DIV/0! = The formula contains a reference to a blank cell or to a cell that contains zero as a divisor.
240420_at	arylacetamide deacetylase-like 2	AADACL2	344752																	0.00487976	952.35	#DIV/0!	#DIV/0!
228041_at	2-aminoadipic 6-semialdehyde dehydrogenase	AASDH	132949													1.23631e-06	1286.92	462.675	-2.78149	9.11292e-05	1914.53	865.575	-2.21185
202169_s_at	aminoadipate-semialdehyde dehydrogenase-phosphopantetheinyl transferase	AASDHPPT	60496													1.69008e-06	6132.9	2644.22	-2.31936	2.63232e-11	11810.8	3088.3	-3.82436
209165_at	apoptosis antagonizing transcription factor	AATF	26574																	9.74554e-09	2291.47	5639.43	2.46105
205986_at	apoptosis-associated tyrosine kinase	AATK	9625																	0.00258678	5386.53	2477.3	-2.17436
209459_s_at	4-aminobutyrate aminotransferase	ABAT	18									6.35822e-07	9407.3	2886.8	-3.25873	6.99012e-07	4729.32	1287.52	-3.67319
209460_at	4-aminobutyrate aminotransferase	ABAT	18									6.57398e-06	4014.45	1265.15	-3.1731	7.44858e-06	2672.25	769.2	-3.47406
203505_at	ATP-binding cassette, sub-family A (ABC1), member 1	ABCA1	19																	0.000173996	6684.47	19223.4	2.87582
203504_s_at	ATP-binding cassette, sub-family A (ABC1), member 1	ABCA1	19																	1.85978e-08	5407.07	18883.8	3.49243
220159_at	ATP-binding cassette, sub-family A (ABC1), member 11 (pseudogene)	ABCA11	79963																	2.98442e-06	1374.45	584.4	-2.3519
241705_at	ATP-binding cassette, sub-family A (ABC1), member 5	ABCA5	23461																	0.020711	1549.7	573.125	-2.70395
242541_at	ATP-binding cassette, sub-family A (ABC1), member 9	ABCA9	10350																	0.00691964	842.867	406.7	-2.07245
223320_s_at	ATP-binding cassette, sub-family B (MDR/TAP), member 10	ABCB10	23456									0.000121778	1222.4	571.7	-2.13818	3.53856e-05	2213.58	912.8	-2.42504	3.44447e-05	3014	1280.8	-2.35322
1570505_at	ATP-binding cassette, sub-family B (MDR/TAP), member 4	ABCB4	5244																	0.0180352	1326.8	440.067	-3.015
215873_x_at	ATP-binding cassette, sub-family C (CFTR/MRP), member 10	ABCC10	89845													0.004333	1064.72	#DIV/0!	#DIV/0!
1552582_at	ATP-binding cassette, sub-family C (CFTR/MRP), member 13	ABCC13	150000																	0.00213823	1158.47	345.2	-3.35593
214979_at	ATP-binding cassette, sub-family C (CFTR/MRP), member 3	ABCC3	8714																	0.00355717	1054.73	523.567	-2.01452
1555039_a_at	ATP-binding cassette, sub-family C (CFTR/MRP), member 4	ABCC4	10257													0.000139618	919.667	183.7	-5.00635
226363_at	ATP-binding cassette, sub-family C (CFTR/MRP), member 5	ABCC5	10057									2.11712e-07	1495.2	579.175	-2.5816	7.07502e-10	1427.65	340.6	-4.19157
1558460_at	ATP-binding cassette, sub-family C (CFTR/MRP), member 5	ABCC5	10057									3.15513e-06	1050.67	247.8	-4.23998	0.00546574	744.375	340.15	-2.18837
209380_s_at	ATP-binding cassette, sub-family C (CFTR/MRP), member 5	ABCC5	10057					2.36579e-05	3328.03	1552.15	-2.14414	1.62228e-07	3941.6	1359.08	-2.90021	1.95269e-11	3440.65	#DIV/0!	#DIV/0!
1557374_at	ATP-binding cassette, sub-family C (CFTR/MRP), member 9	ABCC9	10060													0.000238847	1213.6	400.033	-3.03375	3.35534e-05	3118.75	749.85	-4.15917
1554878_a_at	ATP-binding cassette, sub-family D (ALD), member 3	ABCD3	5825													2.49161e-07	1736.03	557.05	-3.11646	1.34884e-10	4686.82	1001.08	-4.68179
202850_at	ATP-binding cassette, sub-family D (ALD), member 3	ABCD3	5825					0.000171899	918.8	450.425	-2.03985	1.89175e-05	1160.08	486.3	-2.38551	2.2982e-06	1547.8	569.075	-2.71985	3.20845e-10	3143.9	737.3	-4.26407
201872_s_at	ATP-binding cassette, sub-family E (OABP), member 1 /// similar to ATP-binding cassette sub-family E member 1 (RNase L inhibitor) (Ribonuclease 4 inhibitor) (RNS4I)	ABCE1 /// LOC647150	6059													2.6079e-05	1654.42	668.925	-2.47326	2.84153e-07	5366.5	1388.55	-3.86482
201873_s_at	ATP-binding cassette, sub-family E (OABP), member 1 /// similar to ATP-binding cassette sub-family E member 1 (RNase L inhibitor) (Ribonuclease 4 inhibitor) (RNS4I)	ABCE1 /// LOC647150	6059													0.000244453	575.425	183.1	-3.14268
200045_at	ATP-binding cassette, sub-family F (GCN20), member 1	ABCF1	23					4.54833e-08	2715.15	6363.3	2.34363					3.97464e-10	2565.05	7348.68	2.86492	8.64045e-11	2427.55	7343.38	3.02501
204567_s_at	ATP-binding cassette, sub-family G (WHITE), member 1	ABCG1	9619																	1.77428e-07	2453.72	10787.3	4.39629
209735_at	ATP-binding cassette, sub-family G (WHITE), member 2	ABCG2	9429																	0.000173397	1191.03	#DIV/0!	#DIV/0!
222697_s_at	abhydrolase domain containing 10	ABHD10	55347													2.08831e-06	1441.12	529.2	-2.72321	3.81383e-07	2780.25	630.3	-4.41099
218633_x_at	abhydrolase domain containing 10	ABHD10	55347													4.26019e-07	2032.2	683.1	-2.97497	1.10811e-07	3055.43	1024.77	-2.98156
228123_s_at	abhydrolase domain containing 12	ABHD12	26090																	0.00135648	946.175	352.5	-2.68418
234993_at	abhydrolase domain containing 13	ABHD13	84945																	0.00288253	#DIV/0!	594.2	#DIV/0!
235348_at	abhydrolase domain containing 13	ABHD13	84945									0.000139037	2361	1131.78	-2.0861
63825_at	abhydrolase domain containing 2	ABHD2	11057					3.0666e-05	28571.4	12509.6	-2.28395	7.97689e-06	34119.9	14984.8	-2.27696	8.3009e-06	28250.6	10123.4	-2.79063
225337_at	abhydrolase domain containing 2	ABHD2	11057									2.25975e-06	28747.7	12606.5	-2.28038	6.76308e-06	16597.8	7076.88	-2.34535
221815_at	abhydrolase domain containing 2	ABHD2	11057					2.96221e-05	13884	4542.5	-3.05648	4.0264e-06	16536.7	5679.5	-2.91165
87100_at	abhydrolase domain containing 2	ABHD2	11057					3.45347e-05	11993	4086.05	-2.9351	4.44827e-05	13923.5	5250.33	-2.65193
213805_at	abhydrolase domain containing 5	ABHD5	51099																	1.47634e-06	2841.4	8220.8	2.89322
218739_at	abhydrolase domain containing 5	ABHD5	51099													0.000189527	14414.7	30100.4	2.08818	3.79449e-13	3880.38	24163.6	6.22712
225098_at	abl interactor 2	ABI2	10152																	6.25536e-05	2266.15	827.967	-2.73701
202123_s_at	v-abl Abelson murine leukemia viral oncogene homolog 1	ABL1	25													2.75817e-07	1290.55	496.925	-2.59707	0.000680705	#DIV/0!	946.633	#DIV/0!
231907_at	v-abl Abelson murine leukemia viral oncogene homolog 2 (arg, Abelson-related gene)	ABL2	27													2.04605e-08	978.525	279.9	-3.49598
200965_s_at	actin binding LIM protein 1	ABLIM1	3983									4.49039e-08	2752.32	813.65	-3.38269	1.03045e-05	1767.55	729.375	-2.42338	2.16746e-07	2544.5	796.825	-3.1933
1552732_at	actin-binding Rho activating protein	ABRA	137735																	4.98069e-05	1634.58	324.133	-5.04291
218405_at	activator of basal transcription 1	ABT1	29777																	1.1238e-07	#DIV/0!	3051.62	#DIV/0!
229164_s_at	ankyrin repeat and BTB (POZ) domain containing 1	ABTB1	80325																	1.90466e-07	5122.45	14199.8	2.77208
226442_at	ankyrin repeat and BTB (POZ) domain containing 1	ABTB1	80325																	1.27572e-06	2679.35	7659.23	2.85861
228848_at	ankyrin repeat and BTB (POZ) domain containing 1	ABTB1	80325					0.00159019	2072.2	1020.85	-2.02988
43427_at	acetyl-Coenzyme A carboxylase beta	ACACB	32													4.52329e-07	637.8	#DIV/0!	#DIV/0!
221669_s_at	acyl-Coenzyme A dehydrogenase family, member 8	ACAD8	27034					2.40717e-06	1401.9	690.85	-2.02924
202502_at	acyl-Coenzyme A dehydrogenase, C-4 to C-12 straight chain	ACADM	34													0.000100612	1301.2	405.675	-3.20749	0.000854862	1896.38	658.35	-2.8805
226030_at	acyl-Coenzyme A dehydrogenase, short/branched chain	ACADSB	36													2.05972e-05	673.433	#DIV/0!	#DIV/0!
207692_s_at	aggrecan	ACAN	176													0.000117468	1074.78	339.767	-3.16327
209608_s_at	acetyl-Coenzyme A acetyltransferase 2 (acetoacetyl Coenzyme A thiolase)	ACAT2	39									6.58928e-05	1047.8	2510.88	2.39633	9.2973e-10	1392.05	6238.02	4.48118	6.11659e-09	2213.32	8455.5	3.82027
202324_s_at	acyl-Coenzyme A binding domain containing 3	ACBD3	64746																	2.7756e-12	3252.77	7340.05	2.25655
202323_s_at	acyl-Coenzyme A binding domain containing 3	ACBD3	64746																	1.75337e-05	#DIV/0!	2148.2	#DIV/0!
225663_at	acyl-Coenzyme A binding domain containing 5	ACBD5	91452													1.69849e-05	3778.77	7791.75	2.06198	4.85077e-09	2866.53	7971.8	2.781
1568877_a_at	acyl-Coenzyme A binding domain containing 5	ACBD5	91452									0.000514963	966.25	2104.23	2.17772	1.69234e-05	705.367	2005.7	2.84349
1564504_at	amiloride-sensitive cation channel 5, intestinal	ACCN5	51802													0.000167119	760.133	193.05	-3.93749	2.87741e-05	1621.77	483.667	-3.35308
204617_s_at	adrenocortical dysplasia homolog (mouse)	ACD	65057																	0.0219347	#DIV/0!	1151.37	#DIV/0!
207071_s_at	aconitase 1, soluble	ACO1	48																	0.00205473	1298.77	520.8	-2.49379
216103_at	acyl-CoA thioesterase 11	ACOT11	26027													0.00322927	548.125	219	-2.50285
208002_s_at	acyl-CoA thioesterase 7	ACOT7	11332					9.80886e-07	202.167	1812.15	8.96364	1.58472e-06	150.3	871.75	5.80007
236514_at	Acyl-CoA thioesterase 8	ACOT8	10005																	0.000475065	1152.77	477.6	-2.41367
204212_at	acyl-CoA thioesterase 8	ACOT8	10005													1.41045e-05	1544.45	768.4	-2.00996	1.36655e-07	2125.12	927.95	-2.29013
227962_at	acyl-Coenzyme A oxidase 1, palmitoyl	ACOX1	51									0.000155761	3692.8	1426.55	-2.58862	0.000744541	2447.12	1075.15	-2.27608
202767_at	acid phosphatase 2, lysosomal	ACP2	53													7.56341e-06	1123.7	559.2	-2.00948
218795_at	acid phosphatase 6, lysophosphatidic	ACP6	51205													2.03894e-08	5439.93	21247.3	3.90581	2.67725e-11	2724.7	14987	5.50042
242270_at	Acid phosphatase 6, lysophosphatidic	ACP6	---									2.57868e-05	604.025	1718.37	2.84487	0.000430155	816.9	1993.52	2.44035
226925_at	acid phosphatase-like 2	ACPL2	92370																	3.64043e-06	1775.7	627.6	-2.82935
204393_s_at	acid phosphatase, prostate	ACPP	55									8.33148e-06	2230.75	#DIV/0!	#DIV/0!	3.54401e-08	2750.7	468.2	-5.87505
241715_x_at	acid phosphatase, testicular	ACPT	93650													0.000182074	1486.97	#DIV/0!	#DIV/0!	0.000523602	2581.37	1058.77	-2.43809
207969_x_at	acrosomal vesicle protein 1	ACRV1	56													5.27966e-07	984.05	411.725	-2.39007	2.94189e-07	1594.95	527.675	-3.0226
207973_x_at	acrosomal vesicle protein 1	ACRV1	56													0.00804148	717.133	206.4	-3.47448
201963_at	acyl-CoA synthetase long-chain family member 1	ACSL1	2180													8.4696e-06	20479.5	46968.3	2.29342	4.15306e-08	10117.4	30574.1	3.02193
207275_s_at	acyl-CoA synthetase long-chain family member 1	ACSL1	2180													2.15733e-07	13100.2	37868.9	2.89072	4.08253e-09	5966.62	23498.6	3.93834
201660_at	Full-length cDNA clone CS0DF008YJ12 of Fetal brain of Homo sapiens (human) /// Acyl-CoA synthetase long-chain family member 3	ACSL3	2181													3.1259e-05	1324.3	518.15	-2.55582	9.95365e-06	1435.3	533.925	-2.68821
201661_s_at	acyl-CoA synthetase long-chain family member 3	ACSL3	2181					0.000117476	2350.85	1170.6	-2.00824	5.70229e-05	2032.18	896.875	-2.26584	8.07819e-06	2213.88	901.1	-2.45686	1.00802e-05	2962.6	1249.1	-2.37179
222592_s_at	acyl-CoA synthetase long-chain family member 5	ACSL5	51703																	0.000257098	1919.05	13612	7.09311
202666_s_at	actin-like 6A	ACTL6A	86									1.60295e-06	697.8	246.875	-2.82653	9.91644e-06	851.325	328.25	-2.59353	3.4114e-06	1113.52	422.825	-2.63354
203864_s_at	actinin, alpha 2	ACTN2	88																	2.49256e-07	1673.9	524.7	-3.1902
200601_at	actinin, alpha 4	ACTN4	81									1.65649e-05	8739.35	3841.45	-2.27501
222230_s_at	actin-related protein 10 homolog (S. cerevisiae)	ACTR10	55860																	9.79449e-09	5240.5	11699.3	2.23248
1554390_s_at	ARP2 actin-related protein 2 homolog (yeast)	ACTR2	10097																	9.74515e-11	2858.05	6155.93	2.15389
218395_at	ARP6 actin-related protein 6 homolog (yeast)	ACTR6	64431					5.50389e-05	1455.85	613.125	-2.37448
213198_at	activin A receptor, type IB	ACVR1B	91									9.78805e-06	2547.98	6843.3	2.68578	5.75901e-06	3259.93	9458.73	2.90152	9.34265e-09	3303.88	13915.4	4.21184
1552519_at	activin A receptor, type IC	ACVR1C	130399																	0.00019334	2130.9	518.2	-4.11212
205327_s_at	activin A receptor, type IIA	ACVR2A	92																	0.000489608	2358.38	755.267	-3.12257
228416_at	activin A receptor, type IIA	ACVR2A	92																	0.000895357	1075.83	#DIV/0!	#DIV/0!
225421_at	aminoacylase 1-like 2	ACY1L2	135293																	0.000314909	1198.28	2441.65	2.03764
231448_at	adenosine deaminase domain containing 1 (testis-specific)	ADAD1	132612													1.51141e-05	1236.1	468.567	-2.63805	1.64049e-06	2910.33	784.3	-3.71073
205745_x_at	ADAM metallopeptidase domain 17 (tumor necrosis factor, alpha, converting enzyme)	ADAM17	6868																	7.28735e-06	1410.92	3741.8	2.65202
205746_s_at	ADAM metallopeptidase domain 17 (tumor necrosis factor, alpha, converting enzyme)	ADAM17	6868																	0.000589002	#DIV/0!	1311.93	#DIV/0!
1568970_at	ADAM metallopeptidase domain 18	ADAM18	8749																	0.00346726	1388.62	411.85	-3.37168
221128_at	ADAM metallopeptidase domain 19 (meltrin beta)	ADAM19	8728																	0.00180241	1111.33	#DIV/0!	#DIV/0!
209765_at	ADAM metallopeptidase domain 19 (meltrin beta)	ADAM19	8728													1.10375e-07	1674.38	660.575	-2.53472
207665_at	ADAM metallopeptidase domain 21 /// ADAM metallopeptidase domain 21 pseudogene	ADAM21 /// ADAM21P	145241 /// 8747																	0.000805003	914.867	310.9	-2.94264
1555024_at	ADAM metallopeptidase domain 22	ADAM22	53616																	0.00195466	848.925	266	-3.19145
208268_at	ADAM metallopeptidase domain 28	ADAM28	10863									0.000122173	670.525	331.067	-2.02535	9.90652e-06	927.925	355.967	-2.60677	1.52722e-05	1209.55	465.5	-2.59839
202381_at	ADAM metallopeptidase domain 9 (meltrin gamma)	ADAM9	8754									2.74876e-05	5296.48	13514.8	2.55165	4.17905e-11	2609.97	20926.2	8.01776	4.70729e-13	1968	19778.3	10.0499
1555326_a_at	ADAM metallopeptidase domain 9 (meltrin gamma)	ADAM9	8754									6.58526e-07	1083.72	3483.62	3.21449	1.36512e-08	952	3975.5	4.17595	1.02153e-05	#DIV/0!	3543.32	#DIV/0!
1570042_a_at	ADAM metallopeptidase domain 9 (meltrin gamma)	ADAM9	8754									4.99792e-05	301.35	777.075	2.57865
206134_at	ADAM-like, decysin 1	ADAMDEC1	27299																	0.00145245	3036.38	842.75	-3.60294
230040_at	ADAM metallopeptidase with thrombospondin type 1 motif, 18	ADAMTS18	170692																	0.0108651	1311.75	601.45	-2.18098
220717_at	ADAM metallopeptidase with thrombospondin type 1 motif, 20	ADAMTS20	80070													0.00443118	1230.25	365.675	-3.36433	0.000483871	3968.38	982.475	-4.03916
214913_at	ADAM metallopeptidase with thrombospondin type 1 motif, 3	ADAMTS3	9508																	0.0126991	1232.8	392.55	-3.14049
219935_at	ADAM metallopeptidase with thrombospondin type 1 motif, 5 (aggrecanase-2)	ADAMTS5	11096													0.000105595	1043.47	272.475	-3.82962	5.03838e-05	2435.27	626.25	-3.88866
235368_at	ADAM metallopeptidase with thrombospondin type 1 motif, 5 (aggrecanase-2)	ADAMTS5	11096													0.00151161	781.4	#DIV/0!	#DIV/0!	0.000423715	2406.2	822.5	-2.92547
229357_at	ADAM metallopeptidase with thrombospondin type 1 motif, 5 (aggrecanase-2)	ADAMTS5	11096																	2.86045e-05	1102.9	#DIV/0!	#DIV/0!
1570351_at	ADAM metallopeptidase with thrombospondin type 1 motif, 6	ADAMTS6	11174													0.00105866	621.1	#DIV/0!	#DIV/0!	0.00116162	1475.62	545.25	-2.70633
220287_at	ADAM metallopeptidase with thrombospondin type 1 motif, 9	ADAMTS9	56999													7.91437e-06	889.725	310.033	-2.86977	7.09782e-07	1581.25	571.167	-2.76846
233785_at	ADAM metallopeptidase with thrombospondin type 1 motif, 9	ADAMTS9	56999																	0.00127653	973.233	#DIV/0!	#DIV/0!
213974_at	ADAMTS-like 3	ADAMTSL3	57188													0.0007207	524.15	98.6	-5.31592
236817_at	adenosine deaminase, tRNA-specific 2, TAD2 homolog (S. cerevisiae)	ADAT2	134637													9.42079e-06	719.933	#DIV/0!	#DIV/0!	0.000123519	1215.9	377.8	-3.21837
226690_at	Adenylate cyclase activating polypeptide 1 (pituitary) receptor type I	ADCYAP1R1	117													0.00132026	572.267	164.7	-3.4746
209122_at	adipose differentiation-related protein	ADFP	123	9.17642e-08	1617.38	12257.6	7.57868	6.47543e-12	1215.03	33348.9	27.4471	6.91818e-14	890.3	46813.2	52.5814	2.73495e-13	1618.85	80780.8	49.9001	2.70832e-11	6253.57	136427	21.8158
223781_x_at	alcohol dehydrogenase 4 (class II), pi polypeptide	ADH4	127																	4.20701e-05	5368.82	1999.92	-2.68451
208848_at	alcohol dehydrogenase 5 (class III), chi polypeptide	ADH5	128																	4.90657e-05	1556.77	391.85	-3.97286
208847_s_at	alcohol dehydrogenase 5 (class III), chi polypeptide	ADH5	128													0.0017844	2794.65	1207.8	-2.31384	0.00231061	4001.07	1902.75	-2.10279
217761_at	acireductone dioxygenase 1	ADI1	55256									2.14372e-09	6406.05	1743.33	-3.67462	3.31481e-08	6731.15	1935.6	-3.47755	2.7229e-05	5510.12	2512.62	-2.19298
222400_s_at	acireductone dioxygenase 1	ADI1	55256					7.04433e-07	3637.35	1693.45	-2.14789	1.89888e-12	6313.98	1695.55	-3.72385	1.2425e-11	5882.12	1542.8	-3.81263	6.66347e-07	4702.8	2174.65	-2.16255
217748_at	adiponectin receptor 1	ADIPOR1	51094													1.49869e-09	18496.3	43594.8	2.35695	1.44489e-20	5378.27	34856.4	6.48096
201346_at	adiponectin receptor 2	ADIPOR2	79602													4.95818e-09	7463.43	18385.3	2.46339	7.26985e-14	5497.75	20454	3.72043
204120_s_at	adenosine kinase	ADK	132																	0.004252	744.3	279.467	-2.66329
204119_s_at	adenosine kinase	ADK	132									0.000610453	3840.52	1714.22	-2.24039
202912_at	adrenomedullin	ADM	133					0.00161668	45458.3	95912.6	2.1099	5.04632e-07	20851.2	76040.4	3.64682	2.48109e-14	5845.43	88843.6	15.1988	5.03957e-17	6321.85	140828	22.2765
226426_at	activity-dependent neuroprotector homeobox	ADNP	23394									5.61738e-07	2211.25	1090.5	-2.02774	5.25593e-08	1927.55	813.55	-2.36931	2.02343e-07	1553.88	715.825	-2.17075
205013_s_at	adenosine A2a receptor	ADORA2A	135					2.61526e-08	11268.9	37312.1	3.31107	4.40931e-11	3850.6	21664.3	5.62621	8.45824e-11	3857.75	18551.8	4.80897	1.99178e-12	2546.82	16008.1	6.2855
205891_at	adenosine A2b receptor	ADORA2B	136																	0.0219384	#DIV/0!	1928.05	#DIV/0!
206171_at	adenosine A3 receptor	ADORA3	140									1.77224e-05	3228.38	1026.43	-3.14526	4.21157e-09	5500.05	1035.9	-5.30944	1.85245e-07	7645.6	1829.3	-4.17952
224455_s_at	ADP-dependent glucokinase	ADPGK	83440													7.98947e-07	2354.53	6692.73	2.84249
223097_at	ADP-ribosylhydrolase like 2	ADPRHL2	54936	3.33446e-10	1507.62	3372.7	2.23709	7.12073e-10	2015.9	4425.57	2.19533	4.9509e-09	2151.38	4731.73	2.1994					1.59443e-14	2141.28	7082.6	3.30766
206170_at	adrenergic, beta-2-, receptor, surface	ADRB2	154													0.000112163	1185.17	393.45	-3.01226	7.01824e-07	2385.2	627.55	-3.80081
204183_s_at	adrenergic, beta, receptor kinase 2	ADRBK2	157																	4.04228e-05	1782.85	4550	2.55209
201281_at	adhesion regulating molecule 1	ADRM1	11047																	6.55225e-13	3011.93	6428.12	2.13422
202144_s_at	adenylosuccinate lyase	ADSL	158													1.69064e-06	2205.45	935.375	-2.35782
221761_at	adenylosuccinate synthase	ADSS	159									0.00204183	18474.1	8019.92	-2.30353	0.00122538	9189.77	3903.3	-2.35436
235184_at	AE binding protein 2	AEBP2	121536													0.00824863	729.675	251.867	-2.89707	0.000249585	2060.95	635.133	-3.24491
225889_at	AE binding protein 2	AEBP2	121536																	1.08156e-08	5273.5	1685.98	-3.12786
201924_at	AF4/FMR2 family, member 1	AFF1	4299																	9.95962e-07	7765.77	18346	2.36242
225229_at	AF4/FMR2 family, member 4	AFF4	27125													1.4673e-06	5810.58	12584.2	2.16574	3.58677e-12	2699.97	9643.95	3.57187
232864_s_at	AF4/FMR2 family, member 4	AFF4	27125																	3.97094e-07	#DIV/0!	1059.2	#DIV/0!
1555436_a_at	AF4/FMR2 family, member 4	AFF4	27125																	0.00536139	#DIV/0!	991.675	#DIV/0!
1557820_at	AFG3 ATPase family gene 3-like 2 (yeast)	AFG3L2	10939													0.00335958	2635.08	1216.98	-2.16527
222472_at	aftiphilin	AFTPH	54812																	1.3236e-08	4042.47	9025.73	2.23272
204332_s_at	aspartylglucosaminidase	AGA	175													8.9351e-05	1102.12	464.467	-2.37288	3.50139e-10	2279.62	724.85	-3.14496
204333_s_at	aspartylglucosaminidase	AGA	175																	0.000386236	762.4	#DIV/0!	#DIV/0!
1553447_at	ATP/GTP binding protein-like 1	AGBL1	123624																	0.0107567	1345.1	431.55	-3.1169
208042_at	angiogenic factor with G patch and FHA domains 1	AGGF1	55109									6.50432e-05	2632.95	1167.43	-2.25535
203566_s_at	amylo-1, 6-glucosidase, 4-alpha-glucanotransferase (glycogen debranching enzyme, glycogen storage disease type III)	AGL	178									7.56701e-06	2142.57	876.3	-2.44502	8.1539e-09	3686.15	1235.17	-2.98431	3.71241e-10	6357.12	1742.05	-3.64922
219792_at	agmatine ureohydrolase (agmatinase)	AGMAT	79814													0.0017471	724.6	356.833	-2.03064
223184_s_at	1-acylglycerol-3-phosphate O-acyltransferase 3	AGPAT3	56894													0.0116939	665.433	193.55	-3.43804
232007_at	1-acylglycerol-3-phosphate O-acyltransferase 5 (lysophosphatidic acid acyltransferase, epsilon)	AGPAT5	55326													0.0137092	596.15	257.975	-2.31088
224776_at	1-acylglycerol-3-phosphate O-acyltransferase 6 (lysophosphatidic acid acyltransferase, zeta)	AGPAT6	137964					5.35694e-11	3341.02	21455.8	6.42191	1.12576e-14	1182.38	17269.3	14.6056	6.75449e-16	#DIV/0!	14559.8	#DIV/0!	1.51193e-13	3191.7	16659	5.21949
225114_at	alkylglycerone phosphate synthase	AGPS	8540													1.01306e-06	1277.92	450.45	-2.837	5.77869e-10	2211.75	512.825	-4.31287
225113_at	Alkylglycerone phosphate synthase	AGPS	8540																	0.000218082	1236.03	#DIV/0!	#DIV/0!
204500_s_at	ATP/GTP binding protein 1	AGTPBP1	23287																	3.21603e-07	4359.88	10556.6	2.42131
205357_s_at	angiotensin II receptor, type 1	AGTR1	185													4.02905e-05	571.75	261.2	-2.18894	8.43237e-05	968.625	339.7	-2.85141
225059_at	angiotensin II receptor-associated protein	AGTRAP	57085													1.43858e-06	2826.75	8455.3	2.99117	2.32422e-05	2721.85	5877.3	2.1593
1555736_a_at	angiotensin II receptor-associated protein	AGTRAP	57085													3.82277e-05	4227.05	10178.2	2.40787	7.39447e-05	3489.85	8185.32	2.34547
226519_s_at	alanine-glyoxylate aminotransferase 2-like 2	AGXT2L2	85007																	0.000141085	2658.07	1304.25	-2.03801
232488_at	alanine-glyoxylate aminotransferase 2-like 2	AGXT2L2	85007													0.0091882	1419.07	684.8	-2.07224
214766_s_at	AT hook containing transcription factor 1	AHCTF1	25909																	0.00127864	2888.05	7081.65	2.45205
200903_s_at	S-adenosylhomocysteine hydrolase	AHCY	191													0.00021506	811.6	404.9	-2.00445	0.000236857	1522.75	624.9	-2.43679
200850_s_at	S-adenosylhomocysteine hydrolase-like 1	AHCYL1	10768																	4.65401e-09	6212.45	12789.1	2.05862
221569_at	Abelson helper integration site 1	AHI1	54806													0.00674358	854.35	305.133	-2.79992	0.0010021	1978.45	342.85	-5.7706
229354_at	aryl-hydrocarbon receptor repressor	AHRR	10016 /// 57491													8.90637e-06	1686.93	512.4	-3.2922	4.84277e-05	1707.33	#DIV/0!	#DIV/0!
206513_at	absent in melanoma 2	AIM2	9447													0.00015515	2110.15	641.2	-3.29094	0.000320009	2088.57	917.8	-2.27562
219977_at	aryl hydrocarbon receptor interacting protein-like 1	AIPL1	23746																	0.000245351	1329.47	473.6	-2.80717
212175_s_at	adenylate kinase 2	AK2	204									1.10641e-07	4884.58	12294.9	2.51708	4.49944e-10	2937.6	9872.8	3.36084	4.14242e-11	2590.72	8849.77	3.41595
208967_s_at	adenylate kinase 2	AK2	204									1.65947e-08	3514.73	10720.7	3.05023	1.44232e-10	2402.93	9574.35	3.98446	1.59175e-10	1990.58	7258.85	3.64661
224655_at	adenylate kinase 3	AK3	50808													2.04284e-07	3563.65	1436.85	-2.48018	1.9208e-10	5981.22	1589.67	-3.76255
224151_s_at	adenylate kinase 3	AK3	50808									0.000213601	705.925	297.425	-2.37346	6.6669e-05	861.05	397.925	-2.16385	1.40304e-06	1677.7	564.25	-2.97333
204348_s_at	adenylate kinase 3-like 1 /// adenylate kinase 3-like 2 /// similar to Adenylate kinase isoenzyme 4, mitochondrial (ATP-AMP transphosphorylase)	AK3L1 /// AK3L2 /// LOC645619	205 /// 645619					6.91821e-06	#DIV/0!	2290.97	#DIV/0!	2.89307e-07	#DIV/0!	3205.92	#DIV/0!	0.0010734	#DIV/0!	4400.43	#DIV/0!	2.04816e-05	#DIV/0!	8766.12	#DIV/0!
204347_at	adenylate kinase 3-like 2	AK3L2	205 /// 645619					1.92335e-05	347.8	1046.05	3.00762	8.94912e-09	#DIV/0!	1445.28	#DIV/0!					0.00060502	1704.8	3718.1	2.18096
225342_at	adenylate kinase 3-like 2	AK3L2	205 /// 645619					1.71606e-05	300.525	1151.72	3.83238									0.00495677	1700.4	3724.5	2.19037
205045_at	A kinase (PRKA) anchor protein 10	AKAP10	11216													5.97582e-07	1527.8	4419.25	2.89256	2.56859e-07	1648.55	4361.22	2.64549
236007_at	A kinase (PRKA) anchor protein 10	AKAP10	11216					4.38898e-05	1436.7	2953.93	2.05605	3.77355e-06	1531.72	3855.62	2.51718	9.95997e-05	2670.3	5385.62	2.01686	2.47765e-10	2249.07	8758.48	3.89426
236006_s_at	A kinase (PRKA) anchor protein 10	AKAP10	11216													0.000695015	1930.88	4205.98	2.17827	7.68327e-12	844.5	5581.38	6.60909
203156_at	A kinase (PRKA) anchor protein 11	AKAP11	11215																	3.09316e-06	4060	1864.05	-2.17805
215336_at	A kinase (PRKA) anchor protein 11	AKAP11	11215													0.000898794	983.3	431.95	-2.27642
209534_x_at	A kinase (PRKA) anchor protein 13	AKAP13	11214													6.68535e-05	3394.72	1653.88	-2.05259	5.87382e-06	3746.6	1631.5	-2.29641
222024_s_at	A kinase (PRKA) anchor protein 13	AKAP13	11214													0.00152703	3787.7	1881.42	-2.01321
205359_at	A kinase (PRKA) anchor protein 6	AKAP6	9472																	0.00531837	1214.38	543.85	-2.23292
205771_s_at	A kinase (PRKA) anchor protein 7	AKAP7	9465																	2.11201e-05	3635.72	766.45	-4.74359
241978_at	Aldo-keto reductase family 1, member A1 (aldehyde reductase)	AKR1A1	10327													0.00138933	970.767	457.433	-2.1222	0.00019709	1614.53	673.2	-2.3983
201900_s_at	aldo-keto reductase family 1, member A1 (aldehyde reductase)	AKR1A1	10327													0.00168066	1824.58	4740.12	2.59793	0.0013822	1983.95	4615.57	2.32646
201272_at	aldo-keto reductase family 1, member B1 (aldose reductase)	AKR1B1	231													0.00140171	1659.27	#DIV/0!	#DIV/0!	0.00018039	3250.3	1289.45	-2.52069
1562102_at	Aldo-keto reductase family 1, member C1 (dihydrodiol dehydrogenase 1; 20-alpha (3-alpha)-hydroxysteroid dehydrogenase)	AKR1C1	1645																	0.00972068	561.233	#DIV/0!	#DIV/0!
224982_at	AKT1 substrate 1 (proline-rich)	AKT1S1	84335					0.00161997	880.3	#DIV/0!	#DIV/0!
212607_at	v-akt murine thymoma viral oncogene homolog 3 (protein kinase B, gamma)	AKT3	10000																	2.77111e-05	1531.53	454.533	-3.36944
222880_at	v-akt murine thymoma viral oncogene homolog 3 (protein kinase B, gamma)	AKT3	10000																	0.00582148	1493.7	596.8	-2.50285
242876_at	V-akt murine thymoma viral oncogene homolog 3 (protein kinase B, gamma)	AKT3	10000																	7.28338e-05	1195.2	575.1	-2.07825
205633_s_at	aminolevulinate, delta-, synthase 1	ALAS1	211									0.00189776	2795.2	5644.32	2.01929	9.06531e-06	2862.08	8806.45	3.07695
201952_at	activated leukocyte cell adhesion molecule	ALCAM	214									1.84024e-05	3376.18	1372.17	-2.46046	2.15679e-08	3079.22	814.625	-3.77993	2.17043e-08	3011.18	868.95	-3.4653
1569362_at	activated leukocyte cell adhesion molecule	ALCAM	---													0.00165356	706.925	#DIV/0!	#DIV/0!	0.00124547	1621.15	716.9	-2.26133
201951_at	activated leukocyte cell adhesion molecule	ALCAM	214									0.000139975	1663.75	589.35	-2.82303	0.00207702	1203.93	492.633	-2.44386
201425_at	aldehyde dehydrogenase 2 family (mitochondrial)	ALDH2	217																	0.00116473	5327.68	2272.15	-2.34477
202054_s_at	aldehyde dehydrogenase 3 family, member A2	ALDH3A2	224													0.000543273	823.225	273.65	-3.00831	2.35495e-06	1565.58	450.5	-3.47519
221589_s_at	aldehyde dehydrogenase 6 family, member A1	ALDH6A1	4329									3.47409e-06	573.375	146.95	-3.90184	3.21408e-07	1064.62	262.6	-4.05417
221588_x_at	aldehyde dehydrogenase 6 family, member A1	ALDH6A1	4329									0.000318256	756.067	#DIV/0!	#DIV/0!	4.12266e-06	1712.17	516.5	-3.31494
204290_s_at	aldehyde dehydrogenase 6 family, member A1	ALDH6A1	4329													0.00254286	1267.9	#DIV/0!	#DIV/0!
238996_x_at	aldolase A, fructose-bisphosphate	ALDOA	226					3.89971e-05	4606.98	15936.7	3.45924	9.15027e-05	4777.3	15757.8	3.29848	1.59988e-08	3265.95	23608.3	7.22862	4.73619e-15	4066	27050.2	6.65277
214687_x_at	aldolase A, fructose-bisphosphate	ALDOA	226					0.000253975	40765.1	88376.1	2.16794	0.000504089	38934.3	79563.3	2.04353	3.20473e-07	31231.7	104479	3.3453	3.8071e-14	20479.9	151803	7.41228
200966_x_at	aldolase A, fructose-bisphosphate	ALDOA	226					0.000605982	39736.3	83032.1	2.08958	0.00114395	37580.5	75489.4	2.00874	5.21638e-07	30160.2	100740	3.34016	3.0651e-14	18869.9	147525	7.818
202022_at	aldolase C, fructose-bisphosphate	ALDOC	230					2.4661e-08	781.733	9447.23	12.085	1.15448e-11	787.9	25192	31.9736	1.48718e-12	#DIV/0!	36998.2	#DIV/0!	5.04004e-12	6459.1	37684	5.83425
242900_at	asparagine-linked glycosylation 10 homolog B (yeast, alpha-1,2-glucosyltransferase)	ALG10B	144245																	0.0022615	1050.35	251.1	-4.18299
238475_at	asparagine-linked glycosylation 10 homolog B (yeast, alpha-1,2-glucosyltransferase)	ALG10B	144245																	0.0033618	1641.5	609.4	-2.69363
1560733_at	Asparagine-linked glycosylation 5 homolog (S. cerevisiae, dolichyl-phosphate beta-glucosyltransferase)	ALG5	29880																	0.0117997	662.125	326.275	-2.02935
219374_s_at	asparagine-linked glycosylation 9 homolog (S. cerevisiae, alpha- 1,2-mannosyltransferase)	ALG9	79796																	0.0132201	#DIV/0!	996.367	#DIV/0!
234302_s_at	alkB, alkylation repair homolog 5 (E. coli)	ALKBH5	54890					1.05341e-09	5297.35	11885.2	2.24361					7.39139e-11	5835.93	15097.6	2.58701	4.13101e-14	5311.02	16619.4	3.12922
1553101_a_at	alkB, alkylation repair homolog 5 (E. coli)	ALKBH5	54890					4.47959e-06	1850.82	4138.7	2.23614
223318_s_at	alkB, alkylation repair homolog 7 (E. coli)	ALKBH7	84266																	1.76534e-07	#DIV/0!	1539.7	#DIV/0!
227878_s_at	alkB, alkylation repair homolog 7 (E. coli)	ALKBH7	84266																	0.00494892	#DIV/0!	959.2	#DIV/0!
214220_s_at	Alstrom syndrome 1	ALMS1	7840																	0.00028203	718.1	285	-2.51965
214707_x_at	Alstrom syndrome 1	ALMS1	7840													1.72217e-05	6782.15	2878.53	-2.35612
214366_s_at	arachidonate 5-lipoxygenase	ALOX5	240																	5.55878e-05	3241.47	6631.62	2.04587
204174_at	arachidonate 5-lipoxygenase-activating protein	ALOX5AP	241													2.50899e-05	45739	102470	2.24032	1.35736e-09	37071.4	125362	3.38163
215783_s_at	alkaline phosphatase, liver/bone/kidney	ALPL	249													5.11298e-05	821.45	336.067	-2.44431	0.000907588	1035.12	397.5	-2.60409
1554831_x_at	amyotrophic lateral sclerosis 2 (juvenile) chromosome region, candidate 11	ALS2CR11	151254																	0.00586212	735	189.5	-3.87863
226431_at	amyotrophic lateral sclerosis 2 (juvenile) chromosome region, candidate 13	ALS2CR13	150864													4.47854e-06	1246.25	531.75	-2.34368
1554106_at	amyotrophic lateral sclerosis 2 (juvenile) chromosome region, candidate 16	ALS2CR16	65065									0.000179685	335.325	730.075	2.17722					0.000247772	2163	1056.92	-2.0465
223266_at	amyotrophic lateral sclerosis 2 (juvenile) chromosome region, candidate 2	ALS2CR2	55437									2.13095e-05	595.1	#DIV/0!	#DIV/0!	7.42966e-06	1182.57	#DIV/0!	#DIV/0!	0.000146232	2338.68	948.5	-2.46566
209425_at	alpha-methylacyl-CoA racemase	AMACR	114899 /// 23600																	0.00146792	887.25	313.9	-2.82654
201197_at	adenosylmethionine decarboxylase 1	AMD1	262					1.86699e-05	13019.7	5771.07	-2.25603	8.90088e-07	17194.4	6441.8	-2.66919	0.000121792	11999.5	5647.95	-2.12458
201196_s_at	adenosylmethionine decarboxylase 1	AMD1	262					1.42908e-06	15315.9	7024.67	-2.1803	1.72268e-06	20672.9	9717.58	-2.12738	5.75321e-05	15615.5	7773.3	-2.00887
219082_at	amidohydrolase domain containing 2	AMDHD2	51005					0.000321909	703.967	1516.25	2.15387	0.00029403	1338.45	3098.9	2.31529	2.46941e-09	1579.5	5700.17	3.60885	4.12213e-15	#DIV/0!	5237.6	#DIV/0!
222108_at	adhesion molecule with Ig-like domain 2	AMIGO2	347902																	0.00267395	1267.12	457.633	-2.76887
204976_s_at	Alport syndrome, mental retardation, midface hypoplasia and elliptocytosis chromosomal region, gene 1	AMMECR1	9949					0.000363773	558.95	271.9	-2.05572					8.99105e-05	1128.68	495.525	-2.27774	7.21061e-06	2166.18	856.8	-2.52822
209491_s_at	adenosine monophosphate deaminase (isoform E)	AMPD3	272									1.03297e-06	1147.45	4528.77	3.94682	4.88306e-09	738.4	4434.35	6.00535	7.80195e-09	1761.2	5477.42	3.11005
207992_s_at	adenosine monophosphate deaminase (isoform E)	AMPD3	272									7.31276e-08	13768.7	38446.3	2.7923	6.95336e-12	9290.85	41040.4	4.41729	2.14125e-15	8404.8	62157.2	7.39545
208498_s_at	amylase, alpha 1A (salivary) /// amylase, alpha 1B (salivary) /// amylase, alpha 1C (salivary) /// amylase, alpha 2A (pancreatic) /// amylase, alpha 2B (pancreatic) /// similar to Pancreatic alpha-amylase precursor (PA) (1,4-alpha-D-glucan glucanohydrolase)	AMY1A /// AMY1B /// AMY1C /// AMY2A /// AMY2B /// LOC730924	276 /// 277 /// 278 /// 279 /// 280													8.84411e-05	1750.38	649.725	-2.69402	4.00775e-05	2183	944.3	-2.31177
228023_x_at	amylase, alpha 2B (pancreatic)	AMY2B	280													6.58484e-07	6004.73	2640.72	-2.27389	1.02168e-06	8043.73	3846.57	-2.09114
241959_at	anaphase promoting complex subunit 10 /// similar to Anaphase-promoting complex subunit 10 (APC10) (Cyclosome subunit 10)	ANAPC10 /// LOC729198	10393 /// 729198																	1.882e-06	1026.78	270.7	-3.79304
209001_s_at	anaphase promoting complex subunit 13	ANAPC13	25847					9.99826e-09	25862.8	11294.5	-2.28986
239651_at	anaphase promoting complex subunit 5	ANAPC5	51433													0.0154828	795.45	313.3	-2.53894
208722_s_at	anaphase promoting complex subunit 5	ANAPC5	51433									0.00106208	2171.32	1069	-2.03117
225521_at	anaphase promoting complex subunit 7	ANAPC7	51434									0.000144329	795.175	333.625	-2.38344
221825_at	angel homolog 2 (Drosophila)	ANGEL2	90806									2.71931e-06	2493.05	1042.15	-2.39222	5.48727e-07	2400.15	952.267	-2.52046	1.82789e-05	2208.72	1003.3	-2.20146
205609_at	angiopoietin 1	ANGPT1	284									2.71441e-05	897.775	254.9	-3.52207	1.17157e-08	1628.62	417.5	-3.9009	3.40861e-09	2215.48	408.25	-5.42676
205608_s_at	angiopoietin 1	ANGPT1	284									2.67846e-05	1112.67	377.35	-2.94866	7.55001e-07	1776.98	468.4	-3.79371	1.12905e-05	2300.25	730.533	-3.14873
243799_x_at	angiopoietin-like 3	ANGPTL3	27329													0.00517678	586.9	217.8	-2.69467	0.000382012	1630.83	#DIV/0!	#DIV/0!
240363_at	ankyrin 1, erythrocytic	ANK1	286													4.93531e-06	2288.5	855.233	-2.67588	7.97488e-07	3961.28	1370.23	-2.89097
202920_at	ankyrin 2, neuronal	ANK2	287													0.00551061	511.425	105.75	-4.83617	0.00446797	1412.22	408.45	-3.45752
239726_at	Ankyrin 3, node of Ranvier (ankyrin G)	ANK3	---													0.00120464	576.4	234.567	-2.4573	2.35136e-06	1542.03	363.633	-4.2406
206385_s_at	ankyrin 3, node of Ranvier (ankyrin G)	ANK3	288																	0.00770056	1204.25	382.9	-3.14508
1559640_at	Ankyrin-repeat and fibronectin type III domain containing 1	ANKFN1	162282													0.0099403	744.9	204.4	-3.64432
224900_at	ankyrin repeat and FYVE domain containing 1	ANKFY1	51479													4.30674e-06	4775.12	2079.43	-2.29637
219081_at	ankyrin repeat and KH domain containing 1	ANKHD1	54882 /// 8637													4.96976e-09	2891.72	5812.25	2.00996	1.17704e-14	2093.53	6718.6	3.20923
233292_s_at	ankyrin repeat and KH domain containing 1 /// MASK-4E-BP3 alternate reading frame gene	ANKHD1 /// MASK-BP3	404734 /// 54882 /// 8637																	3.67531e-07	1929.65	4223.12	2.18854
208772_at	ankyrin repeat and KH domain containing 1 /// MASK-4E-BP3 alternate reading frame gene	ANKHD1 /// MASK-BP3	404734 /// 54882 /// 8637																	5.79582e-08	4511.9	10868.9	2.40894
208773_s_at	ankyrin repeat and KH domain containing 1 /// MASK-4E-BP3 alternate reading frame gene	ANKHD1 /// MASK-BP3	404734 /// 54882 /// 8637																	3.84253e-14	5342.95	16655.2	3.11723
224687_at	ankyrin repeat and IBR domain containing 1	ANKIB1	54467													5.06765e-05	1635.4	616.2	-2.65401
224682_at	ankyrin repeat and IBR domain containing 1	ANKIB1	54467													5.86901e-09	2223.07	921.367	-2.4128
239116_at	Ankyrin repeat domain 10	ANKRD10	55608																	0.0121096	1317.33	335.1	-3.93114
228356_at	ankyrin repeat domain 11	ANKRD11	29123																	4.01792e-09	#DIV/0!	4300.67	#DIV/0!
238538_at	ankyrin repeat domain 11	ANKRD11	29123																	1.78996e-05	#DIV/0!	6320.25	#DIV/0!
216563_at	Ankyrin repeat domain 12	ANKRD12	23253																	3.95702e-06	4330.4	1925.1	-2.24944
212289_at	ankyrin repeat domain 12	ANKRD12	23253																	1.48426e-08	2535.85	6940.93	2.73712
216550_x_at	ankyrin repeat domain 12	ANKRD12	23253																	1.893e-05	2913.47	11827.1	4.05944
212286_at	ankyrin repeat domain 12	ANKRD12	23253																	1.77489e-13	5127.12	20917.9	4.07985
227375_at	ankyrin repeat domain 13C	ANKRD13C	81573																	1.11454e-06	2069.6	537.5	-3.85042
223418_x_at	ankyrin repeat domain 13C	ANKRD13C	81573													0.00326895	733.45	288.267	-2.54435	0.000223872	1890.97	492.9	-3.83643
1554471_a_at	ankyrin repeat domain 13C	ANKRD13C	81573													3.15078e-06	800.15	338.4	-2.36451	2.98723e-05	1573.88	643.275	-2.44666
238597_at	Ankyrin repeat domain 13C	ANKRD13C	81573																	0.00109199	728.533	339.1	-2.14843
38447_at	ankyrin repeat domain 13 family, member D	ANKRD13D	156													3.54619e-05	3301.45	1537.6	-2.14714	1.90162e-08	6779.38	2102.93	-3.22378
225852_at	ankyrin repeat domain 17	ANKRD17	26057																	7.70114e-08	1504.4	3546.2	2.35722
1559406_at	ankyrin repeat domain 18A	ANKRD18A	253650																	4.27086e-05	1893.6	605.9	-3.12527
1570255_s_at	ankyrin repeat domain 20 family, member A1 /// ankyrin repeat domain 20 family, member A3 /// ankyrin repeat domain 20 family, member A2 /// similar to ankyrin repeat domain 20A /// ankyrin repeat domain 20 family, member A4 /// ankyrin repeat domain 20B	ANKRD20A1 /// ANKRD20A2 /// ANKRD20A3 /// ANKRD20A4 /// ANKRD20B /// LOC644339 /// LOC647595 /// LOC653436	375010 /// 441425 /// 441430 /// 647595 /// 728371 /// 728747 /// 728788 /// 729171 /// 84210																	0.00502784	16650.4	3707.78	-4.49066
224012_at	ankyrin repeat domain 20 family, member A1 /// ankyrin repeat domain 20 family, member A3 /// ankyrin repeat domain 20 family, member A2 /// similar to ankyrin repeat domain 20A /// ankyrin repeat domain 20 family, member A4	ANKRD20A1 /// ANKRD20A2 /// ANKRD20A3 /// ANKRD20A4 /// LOC653436	441425 /// 441430 /// 728747 /// 728788 /// 84210																	0.0166081	20390	3232.15	-6.30849
205705_at	ankyrin repeat domain 26	ANKRD26	22852																	0.000616441	2064.4	787.333	-2.62202
1561079_at	ankyrin repeat domain 28	ANKRD28	23243													0.00725613	2247.78	937.6	-2.39737	0.000151153	4930.7	1602.65	-3.07659
226025_at	ankyrin repeat domain 28	ANKRD28	23243													0.000145844	1401.75	483.425	-2.89962	0.00440385	2127.3	1010.6	-2.10499
223864_at	ankyrin repeat domain 30A	ANKRD30A	91074																	0.0188405	1423.65	360.35	-3.95074
223542_at	ankyrin repeat domain 32	ANKRD32	84250					0.000200816	1661.33	571.9	-2.90492					2.58788e-06	1323.3	404.8	-3.26902	1.22771e-07	1961.6	495.45	-3.95923
242209_at	ankyrin repeat domain 33	ANKRD33	341405									0.00356452	#DIV/0!	698.825	#DIV/0!	0.000666442	#DIV/0!	2135.5	#DIV/0!	0.00047119	#DIV/0!	6410.7	#DIV/0!
227337_at	ankyrin repeat domain 37	ANKRD37	353322	7.21221e-12	1011.3	10641.2	10.5223	3.57496e-15	672.875	19824	29.4617	1.29782e-16	605.4	28664	47.3472	1.41667e-16	#DIV/0!	31636.9	#DIV/0!	6.91057e-15	5872.3	36185.2	6.16201
223532_at	ankyrin repeat domain 39	ANKRD39	51239																	0.000106201	864.333	324.433	-2.66413
235777_at	ankyrin repeat domain 44	ANKRD44	91526									0.000254378	1036.6	2456.55	2.36981	6.17642e-06	811.025	2489.8	3.06994
235778_s_at	ankyrin repeat domain 44	ANKRD44	91526					3.68282e-07	2892.8	1214.68	-2.38154
212731_at	ankyrin repeat domain 46	ANKRD46	157567									0.00106812	780.85	314.133	-2.48573	9.81005e-06	1115.97	343.4	-3.24978
225731_at	ankyrin repeat domain 50	ANKRD50	57182																	1.35623e-06	1066.73	347.375	-3.07082
220112_at	ankyrin repeat domain 55	ANKRD55	79722													3.47968e-05	1108.38	470.825	-2.35411
204672_s_at	ankyrin repeat domain 6	ANKRD6	22881													0.000183768	2155.4	1017.58	-2.11817	0.000178389	3946.58	1850.88	-2.13228
230972_at	ankyrin repeat domain 9	ANKRD9	122416													4.98045e-05	#DIV/0!	3061.55	#DIV/0!	1.60356e-06	#DIV/0!	2405.57	#DIV/0!
218274_s_at	ankyrin repeat and zinc finger domain containing 1	ANKZF1	55139					6.82072e-05	1450.3	5228.02	3.60479	2.17322e-05	2043.12	8156.07	3.99196	8.77272e-09	1698.35	11163.5	6.57317	3.0093e-14	#DIV/0!	13699.9	#DIV/0!
222608_s_at	anillin, actin binding protein	ANLN	54443																	0.000715339	639.967	239.6	-2.67098
221505_at	acidic (leucine-rich) nuclear phosphoprotein 32 family, member E	ANP32E	81611									0.00113484	5956.75	13794.7	2.31581	3.68499e-07	4687.47	18544	3.95607	5.53521e-06	4877.27	16263.9	3.33463
208103_s_at	acidic (leucine-rich) nuclear phosphoprotein 32 family, member E	ANP32E	81611									8.49174e-06	1834.55	6693.77	3.64873	1.19891e-11	894.475	9882.17	11.048	5.7752e-09	979.125	6342.65	6.47788
227660_at	anthrax toxin receptor 1	ANTXR1	84168																	0.0214871	1390.73	#DIV/0!	#DIV/0!
225524_at	anthrax toxin receptor 2	ANTXR2	118429																	2.57127e-09	5901.15	21299.8	3.60942
201012_at	annexin A1	ANXA1	301																	8.33088e-05	15077.2	5397.17	-2.79353
206200_s_at	annexin A11	ANXA11	311																	1.2588e-07	28162.1	64044.7	2.27415
228727_at	annexin A11	ANXA11	311																	0.00213996	#DIV/0!	1733.38	#DIV/0!
209369_at	annexin A3	ANXA3	306													8.03022e-05	2489.8	907.875	-2.74245	7.04397e-10	6790.6	933.475	-7.27454
201302_at	annexin A4	ANXA4	307																	0.00040206	2657.85	1240.2	-2.14308
200782_at	annexin A5	ANXA5	308																	1.28173e-06	4122.95	18288.3	4.43572
209860_s_at	annexin A7	ANXA7	310																	2.51255e-07	7819.3	17206.3	2.20049
205639_at	acyloxyacyl hydrolase (neutrophil)	AOAH	313																	1.84004e-05	3408.22	1374.83	-2.47901
207064_s_at	amine oxidase, copper containing 2 (retina-specific)	AOC2	314									0.000343601	1721.28	786.725	-2.1879	0.000267029	1595.88	661.275	-2.41333
204894_s_at	amine oxidase, copper containing 3 (vascular adhesion protein 1)	AOC3	8639									0.000137157	1770.33	520.325	-3.40234	0.000723336	1301.95	496.5	-2.62226
203350_at	adaptor-related protein complex 1, gamma 1 subunit	AP1G1	164																	7.18533e-11	#DIV/0!	5092.77	#DIV/0!
1553165_at	AP1 gamma subunit binding protein 1	AP1GBP1	11276																	0.0186994	1102.1	542.675	-2.03087
223025_s_at	adaptor-related protein complex 1, mu 1 subunit	AP1M1	8907									2.79814e-06	1871	780.467	-2.39728
223024_at	adaptor-related protein complex 1, mu 1 subunit	AP1M1	8907									1.07204e-06	4964.88	2181.7	-2.27569
230413_s_at	Adaptor-related protein complex 1, sigma 2 subunit	AP1S2	---																	0.0132562	1348.72	3079.05	2.28293
203300_x_at	adaptor-related protein complex 1, sigma 2 subunit	AP1S2	8905													2.45937e-07	4231.52	12241.8	2.89299	8.4088e-11	3591.03	16615.2	4.62688
230264_s_at	adaptor-related protein complex 1, sigma 2 subunit	AP1S2	8905													2.02264e-08	10832.5	27441.7	2.53327	1.56025e-14	6942.35	36117.8	5.20253
203299_s_at	adaptor-related protein complex 1, sigma 2 subunit /// similar to adaptor-related protein complex 1 sigma 2 subunit	AP1S2 /// LOC653653	8905																	0.00147027	#DIV/0!	3953.2	#DIV/0!
1555731_a_at	adaptor-related protein complex 1, sigma 3 subunit	AP1S3	130340									9.08764e-05	139.4	1306.05	9.36908	0.000118431	152.2	1517.25	9.96879
1555733_s_at	adaptor-related protein complex 1, sigma 3 subunit	AP1S3	130340													0.0011792	#DIV/0!	824.8	#DIV/0!
234068_s_at	adaptor-related protein complex 2, alpha 1 subunit	AP2A1	160																	2.28385e-12	#DIV/0!	879.075	#DIV/0!
212159_x_at	adaptor-related protein complex 2, alpha 2 subunit	AP2A2	161																	0.0212181	#DIV/0!	2323.9	#DIV/0!
203141_s_at	adaptor-related protein complex 3, beta 1 subunit	AP3B1	8546																	5.72268e-07	3619.4	1228.08	-2.94721
206592_s_at	adaptor-related protein complex 3, delta 1 subunit	AP3D1	8943																	5.18723e-08	#DIV/0!	9813.92	#DIV/0!
208710_s_at	adaptor-related protein complex 3, delta 1 subunit	AP3D1	8943																	0.0010632	#DIV/0!	3158.12	#DIV/0!
222516_at	adaptor-related protein complex 3, mu 1 subunit	AP3M1	26985					1.99373e-06	4370.25	2000.22	-2.18488	1.0768e-05	4933.77	2462.22	-2.00379
1569053_at	adaptor-related protein complex 3, mu 2 subunit	AP3M2	10947																	0.00120082	1254.1	595.4	-2.10632
202442_at	adaptor-related protein complex 3, sigma 1 subunit	AP3S1	1176													3.60785e-13	16480	34483.8	2.09247	9.99273e-17	13701.9	36302.4	2.64944
202398_at	adaptor-related protein complex 3, sigma 2 subunit	AP3S2	10239																	0.000533204	#DIV/0!	613.425	#DIV/0!
202399_s_at	adaptor-related protein complex 3, sigma 2 subunit /// chromosome 15 open reading frame 38	AP3S2 /// C15orf38	10239													5.07964e-08	3891.57	8770.77	2.25379
231714_s_at	adaptor-related protein complex 4, beta 1 subunit	AP4B1	10717																	2.27911e-07	2281.5	1041.25	-2.19112
228164_at	adaptor-related protein complex 4, epsilon 1 subunit	AP4E1	23431																	0.0213377	#DIV/0!	697.675	#DIV/0!
215148_s_at	amyloid beta (A4) precursor protein-binding, family A, member 3 (X11-like 2)	APBA3	9546													6.86616e-05	2727.02	5598.9	2.05312	1.98806e-10	1909.22	7344.1	3.84664
205146_x_at	amyloid beta (A4) precursor protein-binding, family A, member 3 (X11-like 2)	APBA3	9546													1.35481e-05	609	1735.07	2.84906	6.41317e-09	#DIV/0!	2168	#DIV/0!
1554571_at	amyloid beta (A4) precursor protein-binding, family B, member 1 interacting protein	APBB1IP	54518																	0.001141	#DIV/0!	2244.23	#DIV/0!
40148_at	amyloid beta (A4) precursor protein-binding, family B, member 2 (Fe65-like)	APBB2	323													0.000282971	536.05	168.45	-3.18225	0.01944	896.1	410.3	-2.18401
201284_s_at	N-acylaminoacyl-peptide hydrolase	APEH	327									8.74289e-05	1968.12	958.275	-2.05382
214960_at	apoptosis inhibitor 5	API5	8539																	6.29309e-06	1509.25	409.7	-3.68379
201687_s_at	apoptosis inhibitor 5	API5	8539									4.20069e-06	2126.85	996.55	-2.13421	2.8582e-09	2294.45	740.575	-3.0982	1.01162e-07	2699.38	1047.25	-2.57758
201686_x_at	apoptosis inhibitor 5	API5	8539																	6.8701e-08	2181.73	854.075	-2.55449
214959_s_at	apoptosis inhibitor 5	API5	8539													1.56303e-06	873.55	392.567	-2.22523
218698_at	APAF1 interacting protein	APIP	51074									9.05814e-06	1868.55	776.5	-2.40637	3.17073e-06	2667.23	1068.65	-2.49588
214875_x_at	amyloid beta (A4) precursor-like protein 2	APLP2	334													5.57919e-08	6192.52	25693.1	4.14905	7.89214e-13	5488.2	24845.2	4.52703
208702_x_at	amyloid beta (A4) precursor-like protein 2	APLP2	334													1.43109e-05	11456	31464.5	2.74656	7.82169e-12	5079.25	30754.6	6.05496
211404_s_at	amyloid beta (A4) precursor-like protein 2	APLP2	334													9.02301e-07	12019.3	33677.3	2.80194	9.59649e-14	4353.25	31285.7	7.18675
208703_s_at	amyloid beta (A4) precursor-like protein 2	APLP2	334													0.00133432	4264.73	9806.95	2.29955
208248_x_at	amyloid beta (A4) precursor-like protein 2	APLP2	334													0.000113152	7229.4	17165.1	2.37434
208704_x_at	amyloid beta (A4) precursor-like protein 2	APLP2	334													0.000105117	6473.55	15487.8	2.39247
220023_at	apolipoprotein B48 receptor	APOB48R	55911													6.35591e-10	7764.45	26667.1	3.43452	3.65817e-16	3763.57	28437.1	7.55586
206160_at	apolipoprotein B mRNA editing enzyme, catalytic polypeptide-like 2	APOBEC2	10930													0.00315673	954.8	#DIV/0!	#DIV/0!
209584_x_at	apolipoprotein B mRNA editing enzyme, catalytic polypeptide-like 3C	APOBEC3C	27350													3.04402e-06	1525.5	508.125	-3.00221	0.000650641	2069.5	944.133	-2.19196
243912_x_at	apolipoprotein B mRNA editing enzyme, catalytic polypeptide-like 3F	APOBEC3F	200316 /// 60489																	1.47441e-05	2530.5	972.4	-2.60232
214995_s_at	apolipoprotein B mRNA editing enzyme, catalytic polypeptide-like 3G /// apolipoprotein B mRNA editing enzyme, catalytic polypeptide-like 3F	APOBEC3F /// APOBEC3G	200316 /// 60489																	0.000288103	1851.78	783.933	-2.36216
204205_at	apolipoprotein B mRNA editing enzyme, catalytic polypeptide-like 3G	APOBEC3G	200316 /// 60489													0.00305287	3143.6	1329.9	-2.36379	0.000487058	4495.83	1340	-3.3551
1554545_at	apolipoprotein B mRNA editing enzyme, catalytic polypeptide-like 4 (putative)	APOBEC4	403314													0.000275398	811.075	375.967	-2.15731	0.000262725	1485.98	503.1	-2.95364
1557116_at	apolipoprotein L, 6	APOL6	80830													1.65328e-05	4097.98	1288.8	-3.17968	0.000106281	3625.8	1226.42	-2.9564
1557236_at	apolipoprotein L, 6	APOL6	80830									0.00180317	2519.3	743	-3.39071	0.00614995	1595.9	674.675	-2.36544	0.00725564	1430	537.2	-2.66195
219716_at	apolipoprotein L, 6	APOL6	80830													0.00017223	2173.13	986.05	-2.20388
205682_x_at	apolipoprotein M	APOM	55937													8.42216e-05	878.125	427.5	-2.05409
211277_x_at	amyloid beta (A4) precursor protein (peptidase nexin-II, Alzheimer disease)	APP	351																	6.42598e-05	3566.85	1324.78	-2.69242
202268_s_at	amyloid beta precursor protein binding protein 1	APPBP1	8883					8.09213e-05	1471.8	708.925	-2.0761					1.27267e-07	2573.22	838.6	-3.06848	1.274e-05	3485.6	1475.45	-2.3624
202631_s_at	amyloid beta precursor protein (cytoplasmic tail) binding protein 2	APPBP2	10513																	3.78073e-07	1219.58	2482.22	2.03532
222538_s_at	adaptor protein, phosphotyrosine interaction, PH domain and leucine zipper containing 1	APPL1	26060																	1.55597e-08	1642.3	705.1	-2.32917
218527_at	aprataxin	APTX	54840													4.43079e-05	997.767	496.525	-2.0095
39248_at	aquaporin 3 (Gill blood group)	AQP3	360																	0.000805321	1091.9	343.1	-3.18245
205568_at	aquaporin 9	AQP9	366																	2.98875e-11	17006.8	79174.1	4.65543
201176_s_at	archain 1	ARCN1	372													8.69885e-09	5984.95	13446.8	2.24677	7.63697e-16	3731.05	17143.4	4.5948
210603_at	ARD1 homolog B (S. cerevisiae)	ARD1B	84779													0.00185968	874.35	#DIV/0!	#DIV/0!	0.00278028	1702.95	608.167	-2.80014
232175_at	ADP-ribosylation factor 1	ARF1	375																	6.86885e-11	1477.7	4022.05	2.72183
1565651_at	ADP-ribosylation factor 1	ARF1	375																	2.11376e-10	1596.72	4753.43	2.97698
200065_s_at	ADP-ribosylation factor 1	ARF1	375													1.03383e-09	32087.2	70233	2.18882	2.06658e-19	14540.5	79198.7	5.44675
208750_s_at	ADP-ribosylation factor 1	ARF1	375													5.00417e-07	15003.5	31552.2	2.10298	2.2039e-16	6586.88	37812	5.74051
200734_s_at	ADP-ribosylation factor 3	ARF3	377																	2.53603e-09	#DIV/0!	4050.88	#DIV/0!
211622_s_at	ADP-ribosylation factor 3	ARF3	377																	0.000101753	#DIV/0!	1845.28	#DIV/0!
201097_s_at	ADP-ribosylation factor 4	ARF4	378													6.3978e-09	15061.6	33415.6	2.2186	4.21432e-18	7596.25	42769.5	5.63034
201096_s_at	ADP-ribosylation factor 4	ARF4	378													1.26089e-09	7957.88	25834.7	3.24643	3.2969e-16	4377.07	33138.9	7.57101
203311_s_at	ADP-ribosylation factor 6	ARF6	382													0.000742238	#DIV/0!	2611.27	#DIV/0!
234001_s_at	ADP-ribosylation factor GTPase activating protein 1	ARFGAP1	55738																	7.38595e-08	#DIV/0!	1505.3	#DIV/0!
202211_at	ADP-ribosylation factor GTPase activating protein 3	ARFGAP3	26286									0.000262149	9162.85	18689.3	2.03968	1.08672e-07	7610.27	25124.4	3.30138	5.11668e-14	3567.05	24685.1	6.92031
218098_at	ADP-ribosylation factor guanine nucleotide-exchange factor 2 (brefeldin A-inhibited)	ARFGEF2	10564																	4.09455e-06	1959.42	5834.75	2.97779
215931_s_at	ADP-ribosylation factor guanine nucleotide-exchange factor 2 (brefeldin A-inhibited)	ARFGEF2	10564																	2.17078e-07	#DIV/0!	1057.9	#DIV/0!
214483_s_at	ADP-ribosylation factor interacting protein 1 (arfaptin 1)	ARFIP1	27236													6.48066e-06	3873.95	8342.8	2.15356	1.26435e-09	2464.17	8167.18	3.31436
218230_at	ADP-ribosylation factor interacting protein 1 (arfaptin 1)	ARFIP1	27236																	4.89346e-18	5773.38	24330.8	4.21432
202109_at	ADP-ribosylation factor interacting protein 2 (arfaptin 2)	ARFIP2	23647													0.00473147	#DIV/0!	2187.17	#DIV/0!	1.04889e-07	#DIV/0!	3130.07	#DIV/0!
206177_s_at	arginase, liver	ARG1	383									2.90075e-07	852.575	7684.45	9.01322	0.000518845	2214.47	8704.52	3.93074
216689_x_at	Rho GTPase activating protein 1	ARHGAP1	392																	1.00872e-05	#DIV/0!	1272.07	#DIV/0!
202117_at	Rho GTPase activating protein 1	ARHGAP1	392					1.33421e-05	9696.92	4489.9	-2.15972	1.2071e-07	10187.8	4020.97	-2.53365	9.72786e-07	9281.1	3489.33	-2.65986
207606_s_at	Rho GTPase activating protein 12	ARHGAP12	94134													0.00122821	867.167	1853	2.13684	3.47836e-08	1038.37	3655.4	3.52034
218870_at	Rho GTPase activating protein 15	ARHGAP15	55843									2.17358e-06	19924.3	7076.67	-2.81549	5.55217e-06	26374.5	10582.9	-2.49219
225171_at	Rho GTPase activating protein 18	ARHGAP18	93663													0.000416131	3373.27	8502.1	2.52043	4.38854e-05	2659.57	7450.58	2.80142
225173_at	Rho GTPase activating protein 18	ARHGAP18	93663													0.000408145	2417.18	6511.8	2.69397	1.22279e-07	1283.05	6330.12	4.93365
212738_at	Rho GTPase activating protein 19	ARHGAP19	84986					9.36259e-06	2017.17	#DIV/0!	#DIV/0!									0.000534407	#DIV/0!	2275.5	#DIV/0!
37577_at	Rho GTPase activating protein 19	ARHGAP19	84986					6.35372e-08	1564	637.975	-2.45151
38149_at	Rho GTPase activating protein 25	ARHGAP25	9938	7.16376e-05	21331.8	10075.6	-2.11717													9.56256e-08	14372.9	42091.3	2.92853
204882_at	Rho GTPase activating protein 25	ARHGAP25	9938	7.18796e-05	24456.4	11103.9	-2.20251													1.2824e-07	14377.2	43752.9	3.04321
226576_at	Rho GTPase activating protein 26	ARHGAP26	23092																	4.67507e-08	1586.67	3904.35	2.46071
205068_s_at	Rho GTPase activating protein 26	ARHGAP26	23092													6.81931e-14	4838.08	18370.5	3.79708	7.96636e-17	2781.12	15385.2	5.53199
215955_x_at	Rho GTPase activating protein 26	ARHGAP26	23092																	2.85043e-06	#DIV/0!	3779.07	#DIV/0!
225618_at	Rho GTPase activating protein 27	ARHGAP27	201176									2.43552e-05	10253.8	5021.92	-2.0418	7.98149e-06	8729.83	3981.9	-2.19238
227057_at	Rho GTPase activating protein 27	ARHGAP27	201176					0.00231928	4471.48	2056.32	-2.1745
235635_at	Rho GTPase activating protein 5	ARHGAP5	394													0.00664305	1029.92	361.3	-2.85061	0.00319596	2001.77	540.2	-3.70562
217936_at	Rho GTPase activating protein 5	ARHGAP5	394													0.000372449	1447.23	615.975	-2.34949	6.36469e-08	3473.78	959.867	-3.61902
233849_s_at	Rho GTPase activating protein 5	ARHGAP5	394													0.000202655	1309.15	434	-3.01647	1.62364e-06	2819.77	783.4	-3.59941
201167_x_at	Rho GDP dissociation inhibitor (GDI) alpha	ARHGDIA	396									0.000915775	946.7	1982.75	2.09438	0.000140197	1159	2480.3	2.14003	6.28749e-06	921.5	2244.78	2.436
211716_x_at	Rho GDP dissociation inhibitor (GDI) alpha	ARHGDIA	396					3.61482e-12	3109.57	7373.32	2.37117					1.11841e-10	3556.43	7845.82	2.2061	9.71702e-13	3338.52	8222.02	2.46277
213606_s_at	Rho GDP dissociation inhibitor (GDI) alpha	ARHGDIA	396									0.00267218	860.3	1926.25	2.23904	4.987e-06	698.4	2583.35	3.69895	1.49525e-08	#DIV/0!	2142.75	#DIV/0!
201168_x_at	Rho GDP dissociation inhibitor (GDI) alpha /// similar to Rho GDP dissociation inhibitor (GDI) alpha	ARHGDIA /// LOC728908	396					1.23815e-05	2451.4	6237.85	2.54461	3.75668e-05	2754.5	6420.5	2.33091	9.92786e-06	3122.35	7886.38	2.52578	1.52369e-08	#DIV/0!	7418.62	#DIV/0!
203055_s_at	Rho guanine nucleotide exchange factor (GEF) 1	ARHGEF1	9138																	2.81184e-05	3466.88	1700.25	-2.03904
218501_at	Rho guanine nucleotide exchange factor (GEF) 3	ARHGEF3	50650									0.000976382	1119.68	2277.8	2.03434
209539_at	Rac/Cdc42 guanine nucleotide exchange factor (GEF) 6	ARHGEF6	9459					4.00096e-08	8405.02	2862.47	-2.93628	3.89523e-12	13188.2	2698.98	-4.88637	4.30249e-16	15293.9	1561.02	-9.79733	6.74803e-16	11959	1388.7	-8.61162
1562271_x_at	Rho guanine nucleotide exchange factor (GEF) 7	ARHGEF7	8874																	0.00379347	1209	590.175	-2.04854
233339_s_at	AT rich interactive domain 1B (SWI1-like)	ARID1B	57492																	1.34557e-07	1806.2	649.067	-2.78276
225184_at	AT rich interactive domain 1B (SWI1-like) /// similar to AT rich interactive domain 1B (SWI1-like) isoform 1	ARID1B /// LOC729446	57492 /// 729446																	0.0189164	#DIV/0!	631.933	#DIV/0!
218964_at	AT rich interactive domain 3B (BRIGHT-like)	ARID3B	10620																	1.90737e-11	2087.8	6923.45	3.31615
223111_x_at	AT rich interactive domain 4B (RBP1-like)	ARID4B	51742																	4.47645e-05	#DIV/0!	3451.38	#DIV/0!
212614_at	AT rich interactive domain 5B (MRF1-like)	ARID5B	84159													0.000443086	1120.77	257.225	-4.35715	3.79116e-06	1904.08	570.7	-3.33639
201879_at	ariadne homolog, ubiquitin-conjugating enzyme E2 binding protein, 1 (Drosophila)	ARIH1	25820																	5.86278e-15	2771.1	5616.92	2.02697
201881_s_at	ariadne homolog, ubiquitin-conjugating enzyme E2 binding protein, 1 (Drosophila)	ARIH1	25820									2.31553e-08	5569.6	12102.6	2.17297	8.0923e-12	3949.4	11791.9	2.98574	2.2528e-09	3951.23	8959.27	2.26747
201880_at	Ariadne homolog, ubiquitin-conjugating enzyme E2 binding protein, 1 (Drosophila)	ARIH1	25820													6.46789e-10	4753.02	11785.9	2.47967	2.66879e-15	2155.15	8359.62	3.87891
201878_at	ariadne homolog, ubiquitin-conjugating enzyme E2 binding protein, 1 (Drosophila)	ARIH1	25820									1.96823e-09	4169.65	8340	2.00017	1.79843e-12	3296.7	8398.57	2.54757
232991_at	ADP-ribosylation factor-like 17	ARL17	641522													0.00081538	1592.13	759.15	-2.09725
210718_s_at	ADP-ribosylation factor-like 17 pseudogene 1	ARL17P1	51326													0.00430009	1799.62	728.25	-2.47116	0.00713014	3948.7	1608.9	-2.45429
241910_x_at	ADP-ribosylation factor-like 17 pseudogene 1	ARL17P1	51326													0.00203582	1197.45	497.875	-2.40512
213433_at	ADP-ribosylation factor-like 3	ARL3	403																	2.52641e-06	1043.97	#DIV/0!	#DIV/0!
202641_at	ADP-ribosylation factor-like 3	ARL3	403	3.26038e-05	2725.25	1336.9	-2.03848
226617_at	ADP-ribosylation factor-like 5A	ARL5A	26225					7.20032e-07	2148.12	663.425	-3.23793									9.43019e-05	1856.65	879.65	-2.11067
218150_at	ADP-ribosylation factor-like 5A	ARL5A	26225					3.36146e-09	4539.98	1639.5	-2.76912
242727_at	ADP-ribosylation factor-like 5B	ARL5B	221079	2.62171e-06	2605.12	8564.08	3.2874					1.13837e-10	936.4	5149.02	5.49875	9.41217e-12	737.2	5311.4	7.20483	1.92657e-08	#DIV/0!	2886.65	#DIV/0!
226345_at	ADP-ribosylation factor-like 5B	ARL5B	---	2.74019e-05	8632.23	24770.4	2.86953					4.64374e-09	3267	15847.4	4.85074	9.04505e-09	3697.7	15096.3	4.08261
211935_at	ADP-ribosylation factor-like 6 interacting protein 1	ARL6IP1	23204													1.04361e-05	5867.7	14489.5	2.46937	4.53912e-08	5351.55	17779.6	3.32233
222700_at	ADP-ribosylation factor-like 6 interacting protein 2	ARL6IP2	64225					2.0646e-06	4934.68	2404.93	-2.0519	2.63691e-06	6478.5	3087.3	-2.09844
225711_at	ADP-ribosylation-like factor 6 interacting protein 6	ARL6IP6	151188													4.22461e-06	1064.1	385.85	-2.75781	7.47649e-06	1750.25	506.933	-3.45262
225707_at	ADP-ribosylation-like factor 6 interacting protein 6	ARL6IP6	151188					4.04487e-06	4210.75	1726.93	-2.43829	1.10666e-08	5655.15	1572.2	-3.59697	1.14017e-08	10212.5	3124.53	-3.2685	1.38091e-06	15029	5862.15	-2.56374
225347_at	ADP-ribosylation factor-like 8A	ARL8A	127829													0.000123648	2079.75	4989.18	2.39893	2.35854e-08	1110.1	3666.02	3.30243
217852_s_at	ADP-ribosylation factor-like 8B	ARL8B	55207																	3.16619e-07	5933.15	17719.7	2.98655
222442_s_at	ADP-ribosylation factor-like 8B	ARL8B	55207													2.37215e-06	5910.67	14411	2.43813	1.42926e-09	3743.75	13871	3.70511
222550_at	armadillo repeat containing 1	ARMC1	55156													2.97649e-06	1980.8	606.85	-3.26407	4.02556e-07	3851.6	1068.83	-3.60358
218185_s_at	armadillo repeat containing 1	ARMC1	55156													5.3579e-07	1537.78	535.8	-2.87005	5.76255e-06	2210.4	804.25	-2.7484
221077_at	armadillo repeat containing 4	ARMC4	55130																	0.0065569	1416.97	427.6	-3.31377
221758_at	armadillo repeat containing 6	ARMC6	93436																	0.0016667	1434.33	528.5	-2.71397
203487_s_at	armadillo repeat containing 8	ARMC8	25852													2.74587e-06	2718.6	1310.93	-2.0738
217858_s_at	armadillo repeat containing, X-linked 3	ARMCX3	51566									8.02708e-09	2929.62	7129.12	2.43346	3.44212e-16	1967.38	10155.1	5.16174	1.50224e-17	1634.68	9960.38	6.09318
202655_at	arginine-rich, mutated in early stage tumors	ARMET	7873									0.00105287	2444	5738.43	2.34796	2.04983e-06	2472.4	7638.6	3.08955	8.90511e-11	2577.85	16998.2	6.59393
218222_x_at	aryl hydrocarbon receptor nuclear translocator	ARNT	405													0.000340656	#DIV/0!	1600.07	#DIV/0!
210828_s_at	aryl hydrocarbon receptor nuclear translocator	ARNT	405													0.00248511	#DIV/0!	890.133	#DIV/0!
200950_at	actin related protein 2/3 complex, subunit 1A, 41kDa	ARPC1A	10552																	8.2823e-08	#DIV/0!	4721.03	#DIV/0!
217818_s_at	actin related protein 2/3 complex, subunit 4, 20kDa	ARPC4	10093 /// 26140																	7.85762e-05	#DIV/0!	1959.93	#DIV/0!
211963_s_at	actin related protein 2/3 complex, subunit 5, 16kDa	ARPC5	10092																	1.49461e-07	37787.7	76333.5	2.02006
1555797_a_at	actin related protein 2/3 complex, subunit 5, 16kDa	ARPC5	10092																	6.81573e-11	13123.2	33090.8	2.52154
221482_s_at	cyclic AMP phosphoprotein, 19 kD	ARPP-19	10776																	6.6223e-11	3413.4	8363.68	2.45025
218832_x_at	arrestin, beta 1	ARRB1	408																	0.00339183	#DIV/0!	601.1	#DIV/0!
222912_at	arrestin, beta 1	ARRB1	408					0.000709712	5842.15	2520.85	-2.31753
203388_at	arrestin, beta 2	ARRB2	409																	2.62673e-09	7632.98	22150.9	2.902
226055_at	arrestin domain containing 2	ARRDC2	27106													8.13949e-08	13838.1	48561.7	3.50926	5.20269e-13	6333.97	40661.5	6.41958
224797_at	arrestin domain containing 3	ARRDC3	57561																	2.05657e-12	5632.85	30600	5.43242
236541_at	Arylsulfatase A	ARSA	410									0.00334721	638.55	#DIV/0!	#DIV/0!
1552632_a_at	arylsulfatase G	ARSG	22901																	1.61931e-09	940.267	2724.8	2.8979
239147_at	arylsulfatase family, member K	ARSK	153642																	0.00337083	2093.47	716.85	-2.92038
207919_at	ADP-ribosyltransferase 1	ART1	417													0.000707989	733.875	356.2	-2.06029
214034_at	type 1 tumor necrosis factor receptor shedding aminopeptidase regulator	ARTS-1	51752													1.00908e-05	1463.48	449.55	-3.25542	1.7714e-06	3104.6	812	-3.8234
209701_at	type 1 tumor necrosis factor receptor shedding aminopeptidase regulator	ARTS-1	51752																	0.00119527	1388.88	552.775	-2.51255
213702_x_at	N-acylsphingosine amidohydrolase (acid ceramidase) 1	ASAH1	427																	1.79378e-11	49295.3	136010	2.75908
210980_s_at	N-acylsphingosine amidohydrolase (acid ceramidase) 1	ASAH1	427																	2.28477e-16	17763.5	78688.9	4.4298
1555419_a_at	N-acylsphingosine amidohydrolase (acid ceramidase) 1	ASAH1	427																	3.62585e-15	20562.7	107467	5.22631
213902_at	N-acylsphingosine amidohydrolase (acid ceramidase) 1	ASAH1	427													8.40552e-11	18945.7	62471.4	3.29739	5.0851e-18	6578.4	50126.1	7.6198
229793_at	N-acylsphingosine amidohydrolase (non-lysosomal ceramidase) 2	ASAH2	653308																	9.58519e-05	3876.45	915.4	-4.23471
227135_at	N-acylsphingosine amidohydrolase (acid ceramidase)-like	ASAHL	27163													7.38345e-05	4734.45	1079.55	-4.38558	3.5506e-05	2987.88	755.55	-3.95457
215178_x_at	N-acylsphingosine amidohydrolase (acid ceramidase)-like	ASAHL	27163													0.0018417	2149.72	933.025	-2.30404	0.000273571	3355.25	1201.85	-2.79174
214765_s_at	N-acylsphingosine amidohydrolase (acid ceramidase)-like	ASAHL	27163													0.0120522	3015.43	1362.17	-2.2137
1553453_at	ankyrin repeat and SOCS box-containing 14	ASB14	142686													0.00101215	799.333	281.6	-2.83854	9.67866e-06	1421.75	573.65	-2.47843
1554627_a_at	activating signal cointegrator 1 complex subunit 1	ASCC1	51008					1.30669e-09	3163.23	9824.17	3.10575	9.81472e-13	2116.18	9915.48	4.68556	2.37925e-14	1242.47	7546.1	6.07344	1.72348e-14	2461.2	7133.92	2.89856
219336_s_at	activating signal cointegrator 1 complex subunit 1	ASCC1	51008					1.89898e-06	2148.15	6020.02	2.80242	6.30246e-08	1443.47	4968.33	3.44192	3.76477e-08	1078.3	4212.38	3.9065	5.19717e-10	1228	4075.32	3.31867
215684_s_at	activating signal cointegrator 1 complex subunit 2	ASCC2	84164																	0.0010036	#DIV/0!	936.525	#DIV/0!
201855_s_at	ATM/ATR-Substrate Chk2-Interacting Zn2+-finger protein	ASCIZ	23300									1.05467e-08	1327.7	457.35	-2.90303	5.88609e-06	1291.67	546.2	-2.36484
203427_at	ASF1 anti-silencing function 1 homolog A (S. cerevisiae)	ASF1A	25842													0.0130985	882.133	347.167	-2.54095	0.00435145	1449.68	537.8	-2.69557
204608_at	argininosuccinate lyase	ASL	435																	0.000147749	#DIV/0!	2300.05	#DIV/0!
232238_at	asp (abnormal spindle) homolog, microcephaly associated (Drosophila)	ASPM	259266																	0.00112167	1692.58	281.25	-6.01804
239002_at	asp (abnormal spindle) homolog, microcephaly associated (Drosophila)	ASPM	259266																	0.0216145	1094	#DIV/0!	#DIV/0!
218857_s_at	asparaginase like 1	ASRGL1	80150													2.73766e-07	4388.57	1206.97	-3.63604	6.57315e-09	6798.3	1175.3	-5.78431
222764_at	asparaginase like 1	ASRGL1	80150													0.00626449	1604.4	636.4	-2.52106	7.59807e-07	2457.25	#DIV/0!	#DIV/0!
1554816_at	astrotactin 2	ASTN2	23245													5.00826e-05	1228.4	364.5	-3.3701	4.80009e-06	2953.9	721	-4.09695
240072_at	Additional sex combs like 2 (Drosophila)	ASXL2	55252													0.00149523	897	432.05	-2.07615	0.000245804	1633.07	772.25	-2.11469
233536_at	additional sex combs like 3 (Drosophila)	ASXL3	80816													0.0140512	783.567	#DIV/0!	#DIV/0!	0.00166424	1515.03	312.5	-4.84811
1569729_a_at	ankyrin repeat, SAM and basic leucine zipper domain containing 1	ASZ1	136991																	4.79822e-05	3119	607.175	-5.1369
213387_at	ATPase family, AAA domain containing 2B	ATAD2B	54454																	7.42958e-11	3547.2	933.9	-3.79827
232908_at	ATPase family, AAA domain containing 2B	ATAD2B	54454									0.000440721	440.075	926.8	2.106
205446_s_at	activating transcription factor 2	ATF2	1386													6.24089e-09	1194.5	2874.43	2.40638	1.15902e-08	1168.3	2400.43	2.05463
212984_at	activating transcription factor 2	ATF2	1386																	8.41357e-10	1918.83	6216.95	3.23998
200779_at	activating transcription factor 4 (tax-responsive enhancer element B67)	ATF4	468																	1.32557e-12	15502.6	36577.6	2.35945
204998_s_at	activating transcription factor 5	ATF5	22809																	0.009113	1058.3	435.633	-2.42934
218987_at	activating transcription factor 7 interacting protein	ATF7IP	55729									2.05886e-06	2987.53	1430.35	-2.08867	8.90221e-08	2577.28	863.1	-2.98607	6.08784e-07	1748.65	721.325	-2.42422
231825_x_at	activating transcription factor 7 interacting protein	ATF7IP	55729													7.83876e-06	13147	5878.68	-2.2364	1.97591e-06	23187.2	10389	-2.23189
213026_at	ATG12 autophagy related 12 homolog (S. cerevisiae)	ATG12	9140																	1.17839e-14	6182.62	19468.3	3.14887
204833_at	ATG12 autophagy related 12 homolog (S. cerevisiae)	ATG12	9140													6.51556e-09	2426.65	5625.05	2.31803	1.45132e-13	#DIV/0!	4981.57	#DIV/0!
220521_s_at	ATG16 autophagy related 16-like 1 (S. cerevisiae)	ATG16L1	55054													0.0110932	612.625	262.133	-2.33707
213300_at	ATG2 autophagy related 2 homolog A (S. cerevisiae)	ATG2A	23130													5.53626e-08	16008.1	52185.2	3.25992	5.43839e-15	5204.58	40358.6	7.75444
1559485_at	ATG2 autophagy related 2 homolog B (S. cerevisiae)	ATG2B	55102																	0.00163413	1397.92	659.7	-2.11903
221492_s_at	ATG3 autophagy related 3 homolog (S. cerevisiae)	ATG3	64422																	3.6812e-13	15247.8	40339.6	2.6456
202512_s_at	ATG5 autophagy related 5 homolog (S. cerevisiae)	ATG5	9474																	4.06131e-06	5916.3	1866.12	-3.17037
202511_s_at	ATG5 autophagy related 5 homolog (S. cerevisiae)	ATG5	9474																	9.63952e-07	2966.6	6157.27	2.07553
218673_s_at	ATG7 autophagy related 7 homolog (S. cerevisiae)	ATG7	10533													1.02353e-05	3085.65	6451.65	2.09086	3.42059e-07	2333.9	5584.95	2.39297
224025_s_at	ATG7 autophagy related 7 homolog (S. cerevisiae)	ATG7	10533													0.000123281	3084.28	7283.38	2.36145	7.06462e-08	#DIV/0!	5662.55	#DIV/0!
1569827_at	ATG7 autophagy related 7 homolog (S. cerevisiae)	ATG7	10533									2.71773e-05	257.5	631.025	2.45058
202492_at	ATG9 autophagy related 9 homolog A (S. cerevisiae)	ATG9A	79065									9.92732e-06	2508.18	5168.98	2.06085	9.08208e-12	1199.35	5496.15	4.58261	1.27636e-09	1595.2	4382.95	2.74759
1554631_at	ataxia telangiectasia mutated	ATM	472													0.000714756	829.625	382.7	-2.16782	0.000184081	1200	482.1	-2.48911
212672_at	ataxia telangiectasia mutated	ATM	472													0.00335403	3000.8	1440.82	-2.0827
210858_x_at	ataxia telangiectasia mutated	ATM	472													0.000695718	2127.68	1054.38	-2.01795
208442_s_at	ataxia telangiectasia mutated /// similar to Serine-protein kinase ATM (Ataxia telangiectasia mutated) (A-T, mutated)	ATM /// LOC651610	472													0.00870143	1605.33	744.65	-2.15582
1558705_at	atonal homolog 8 (Drosophila)	ATOH8	84913																	0.00441032	1999.6	974.55	-2.05182
213238_at	ATPase, Class V, type 10D	ATP10D	57205									0.00106473	1421.58	2980.47	2.0966
215842_s_at	ATPase, Class VI, type 11A	ATP11A	23250																	1.0046e-08	#DIV/0!	837.9	#DIV/0!
230875_s_at	ATPase, Class VI, type 11A	ATP11A	23250													2.06181e-05	6520.95	2641.72	-2.46844
238811_at	ATPase, Class VI, type 11B	ATP11B	23200									1.16427e-08	794.675	2244.65	2.82461	1.02477e-07	943.125	2581.6	2.73728	2.7589e-06	998.725	2079.85	2.08251
1564064_a_at	ATPase, Class VI, type 11B	ATP11B	23200									5.41515e-06	4221.23	9240.9	2.18915	6.54963e-12	2367.97	11595.1	4.89663	5.71889e-13	2415.83	10229.6	4.23441
1554557_at	ATPase, Class VI, type 11B	ATP11B	23200									1.58749e-07	604.95	1643.15	2.71617	0.000169631	614	1265.3	2.06075
1564063_a_at	ATPase, Class VI, type 11B	ATP11B	23200									2.822e-08	749.125	2396.9	3.1996	3.05794e-07	686.85	2018.15	2.93827
1554556_a_at	ATPase, Class VI, type 11B	ATP11B	23200									1.19247e-05	619.575	2182.53	3.52262	1.00747e-05	#DIV/0!	1568.53	#DIV/0!
219558_at	ATPase type 13A3	ATP13A3	79572													0.00460912	1778.1	5922.88	3.33101	0.00256269	#DIV/0!	3616.08	#DIV/0!
1553567_s_at	ATPase type 13A5	ATP13A5	100133315																	8.76298e-10	197647	83263.1	-2.37376
220948_s_at	ATPase, Na+/K+ transporting, alpha 1 polypeptide	ATP1A1	476																	5.13035e-10	2637.9	7221.83	2.73772
201242_s_at	ATPase, Na+/K+ transporting, beta 1 polypeptide	ATP1B1	481													0.00267893	606.9	#DIV/0!	#DIV/0!	0.000605655	823.9	336.6	-2.44771
208836_at	ATPase, Na+/K+ transporting, beta 3 polypeptide	ATP1B3	483																	0.00371734	3330.05	1433.6	-2.32286
212361_s_at	ATPase, Ca++ transporting, cardiac muscle, slow twitch 2	ATP2A2	488									3.39249e-05	1166.45	551.55	-2.11486
212930_at	ATPase, Ca++ transporting, plasma membrane 1	ATP2B1	490									3.81554e-05	9496.62	4634.42	-2.04915					2.7007e-13	1451.3	8015.05	5.52267
215716_s_at	ATPase, Ca++ transporting, plasma membrane 1	ATP2B1	490									1.36666e-05	20822.5	9828.23	-2.11864					5.55107e-14	3778	21458.6	5.67988
209281_s_at	ATPase, Ca++ transporting, plasma membrane 1	ATP2B1	490																	6.36395e-15	2880.2	21480.7	7.45804
212135_s_at	ATPase, Ca++ transporting, plasma membrane 4	ATP2B4	493													0.000252112	1835.78	909.933	-2.01748	1.85514e-06	2868	1071.22	-2.67731
212136_at	ATPase, Ca++ transporting, plasma membrane 4	ATP2B4	493																	6.50025e-05	2124.6	893.225	-2.37857
209935_at	ATPase, Ca++ transporting, type 2C, member 1	ATP2C1	27032																	7.51274e-07	#DIV/0!	1500.78	#DIV/0!
206043_s_at	ATPase, Ca++ transporting, type 2C, member 2	ATP2C2	9914																	0.000623674	#DIV/0!	5131.02	#DIV/0!
213738_s_at	ATP synthase, H+ transporting, mitochondrial F1 complex, alpha subunit 1, cardiac muscle	ATP5A1	498									6.25338e-06	11671.8	5578.7	-2.09221	9.11754e-07	11574.2	4141.9	-2.79443	8.8058e-08	12977.6	4493.6	-2.88802
207508_at	ATP synthase, H+ transporting, mitochondrial F0 complex, subunit C3 (subunit 9)	ATP5G3	518																	3.30718e-07	2799.97	1039.13	-2.69452
210149_s_at	ATP synthase, H+ transporting, mitochondrial F0 complex, subunit d	ATP5H	10476																	3.84124e-07	6304.77	13385.8	2.12312
237400_at	ATP synthase, H+ transporting, mitochondrial F0 complex, subunit s (factor B)	ATP5S	---																	0.00460308	592.433	#DIV/0!	#DIV/0!
207809_s_at	ATPase, H+ transporting, lysosomal accessory protein 1	ATP6AP1	537													1.05028e-10	8699.78	27620.6	3.17486	3.31131e-12	4365.3	16030.6	3.67228
201443_s_at	ATPase, H+ transporting, lysosomal accessory protein 2	ATP6AP2	10159													3.86321e-08	27962.2	13658.3	-2.04726
205095_s_at	ATPase, H+ transporting, lysosomal V0 subunit a1	ATP6V0A1	535																	0.000485055	#DIV/0!	1788.47	#DIV/0!
217603_at	ATPase, H+ transporting, lysosomal V0 subunit a2	ATP6V0A2	23545													0.0115596	672.925	311.267	-2.16189	5.49585e-05	1435.15	#DIV/0!	#DIV/0!
205704_s_at	ATPase, H+ transporting, lysosomal V0 subunit a2	ATP6V0A2	23545					1.7255e-07	1345.37	486.4	-2.76597
200078_s_at	ATPase, H+ transporting, lysosomal 21kDa, V0 subunit b	ATP6V0B	533																	2.68527e-18	11778.6	55560.5	4.71707
36994_at	ATPase, H+ transporting, lysosomal 16kDa, V0 subunit c	ATP6V0C	527													1.73817e-14	17717.5	52961.3	2.98921	5.31693e-21	11082.6	58448.7	5.27393
212041_at	ATPase, H+ transporting, lysosomal 38kDa, V0 subunit d1	ATP6V0D1	9114																	2.21658e-15	9456.52	32581.6	3.44541
1553155_x_at	ATPase, H+ transporting, lysosomal 38kDa, V0 subunit d2	ATP6V0D2	245972																	0.00526792	1203.9	479.95	-2.50839
1553153_at	ATPase, H+ transporting, lysosomal 38kDa, V0 subunit d2	ATP6V0D2	245972																	0.0187212	2155.82	940.5	-2.29221
214150_x_at	ATPase, H+ transporting, lysosomal 9kDa, V0 subunit e1	ATP6V0E1	8992																	1.80117e-12	21893	52544.4	2.40006
201172_x_at	ATPase, H+ transporting, lysosomal 9kDa, V0 subunit e1	ATP6V0E1	8992																	1.21346e-16	14397.7	49487.9	3.43721
200096_s_at	ATPase, H+ transporting, lysosomal 9kDa, V0 subunit e1	ATP6V0E1	8992																	1.13546e-19	12846.8	49388.1	3.84439
213587_s_at	ATPase, H+ transporting V0 subunit e2	ATP6V0E2	155066																	0.00116101	1161.25	427.9	-2.71384
201971_s_at	ATPase, H+ transporting, lysosomal 70kDa, V1 subunit A	ATP6V1A	523																	1.1119e-06	2148.95	6201.12	2.88565
201089_at	ATPase, H+ transporting, lysosomal 56/58kDa, V1 subunit B2	ATP6V1B2	526																	1.76073e-11	18182	48674.8	2.67708
226463_at	ATPase, H+ transporting, lysosomal 42kDa, V1 subunit C1	ATP6V1C1	528																	1.37334e-10	1923.1	5657.35	2.94179
202873_at	ATPase, H+ transporting, lysosomal 42kDa, V1 subunit C1	ATP6V1C1	528																	9.25779e-05	689.4	2231.7	3.23716
202872_at	ATPase, H+ transporting, lysosomal 42kDa, V1 subunit C1	ATP6V1C1	528									2.23677e-06	7833.33	16905.5	2.15815	7.30812e-09	8028.6	24169.5	3.01043	1.79896e-14	3457.9	19713.5	5.70102
202874_s_at	ATPase, H+ transporting, lysosomal 42kDa, V1 subunit C1	ATP6V1C1	528													2.83099e-11	9298.35	32900.7	3.53834	3.83435e-16	4548.18	28030.9	6.16311
208898_at	ATPase, H+ transporting, lysosomal 34kDa, V1 subunit D	ATP6V1D	51382													7.84297e-16	6079.95	25137.6	4.13451	5.34654e-20	2592.47	16810	6.48414
208899_x_at	ATPase, H+ transporting, lysosomal 34kDa, V1 subunit D	ATP6V1D	51382									1.60522e-06	8096.83	17908.7	2.21182	7.05944e-13	5866.5	25307.8	4.31394	2.94042e-16	2701.32	17592.6	6.51259
208678_at	ATPase, H+ transporting, lysosomal 31kDa, V1 subunit E1	ATP6V1E1	529																	1.51437e-17	6475.12	29478.7	4.55261
201527_at	ATPase, H+ transporting, lysosomal 14kDa, V1 subunit F	ATP6V1F	9296													1.13587e-08	5379.35	20338.5	3.78085	5.3605e-09	6895.9	25703.7	3.72739
208737_at	ATPase, H+ transporting, lysosomal 13kDa, V1 subunit G1	ATP6V1G1	9550																	1.09253e-13	19985.6	66587.6	3.33178
1557586_s_at	ATPase, H+ transporting, lysosomal 50/57kDa, V1 subunit H	ATP6V1H	51606																	0.00017853	1537.32	577.525	-2.66192
214594_x_at	ATPase, Class I, type 8B, member 1	ATP8B1	5205													1.02284e-05	11757.8	5083.07	-2.31313	6.24217e-05	21730.2	9950.45	-2.18384
216873_s_at	ATPase, Class I, type 8B, member 2	ATP8B2	57198																	1.68166e-05	1582.08	684.525	-2.3112
220416_at	ATPase, Class I, type 8B, member 4	ATP8B4	79895													8.06372e-07	725.85	337.3	-2.15194	5.79295e-10	2125.9	459.867	-4.62286
209903_s_at	ataxia telangiectasia and Rad3 related	ATR	545													2.97184e-08	1176.75	434.7	-2.70704	7.20926e-07	1382.65	635.5	-2.17569
1569796_s_at	attractin-like 1	ATRNL1	26033													0.000129878	1206.2	#DIV/0!	#DIV/0!	5.55106e-07	3694.65	#DIV/0!	#DIV/0!
203231_s_at	ataxin 1	ATXN1	6310																	2.64997e-05	1854	4450.55	2.40051
203232_s_at	ataxin 1	ATXN1	6310																	8.94127e-06	2366.95	7386.75	3.12079
208833_s_at	ataxin 10	ATXN10	25814													6.73242e-06	2938.4	698.95	-4.20402	3.7609e-06	4369.95	1169.07	-3.73798
208832_at	ataxin 10	ATXN10	25814																	3.09734e-05	1683.3	689.133	-2.44263
226095_s_at	ataxin 1-like	ATXN1L	342371																	1.28988e-07	#DIV/0!	2883.6	#DIV/0!
207798_s_at	ataxin 2-like	ATXN2L	11273																	0.0049436	#DIV/0!	1264.47	#DIV/0!
205415_s_at	ataxin 3	ATXN3	4287																	0.000975514	#DIV/0!	1844.1	#DIV/0!
227732_at	ataxin 7-like 1	ATXN7L1	222255																	0.000317374	2159.82	1065.03	-2.02796
224969_at	ataxin 7-like 3	ATXN7L3	56970																	0.00209039	#DIV/0!	2911.18	#DIV/0!
218580_x_at	aurora kinase A interacting protein 1 /// similar to Cyclin-L2 (Paneth cell-enhanced expression protein)	AURKAIP1 /// LOC727877	54998																	3.36849e-12	4174.18	9275.2	2.22204
225552_x_at	aurora kinase A interacting protein 1 /// similar to Cyclin-L2 (Paneth cell-enhanced expression protein)	AURKAIP1 /// LOC727877	54998																	4.97399e-14	4804.65	11492	2.39184
212599_at	autism susceptibility candidate 2	AUTS2	26053																	0.0021976	2873.35	626.45	-4.58672
205539_at	advillin	AVIL	10677									0.00433318	855.175	398.5	-2.14598	4.02415e-05	912.55	363.05	-2.51357
1568706_s_at	Advillin	AVIL	10677									0.000838055	960.3	#DIV/0!	#DIV/0!	0.000166708	1074.4	#DIV/0!	#DIV/0!
225557_at	AXIN1 up-regulated 1	AXUD1	64651					2.53224e-07	10535.7	36576.1	3.47164	1.14249e-10	5919.9	36895.1	6.23239	1.8457e-13	3190.6	38475.6	12.059	2.08209e-13	3283.38	30818.9	9.38636
227889_at	acyltransferase like 1	AYTL1	54947									3.19502e-09	6172.3	1600.38	-3.85678	1.04762e-13	7962.45	1004.33	-7.92816	8.7497e-10	7013.65	1673.83	-4.19019
201818_at	acyltransferase like 2	AYTL2	79888													2.17182e-06	30000.1	79011.5	2.6337	2.62398e-16	9285.12	91872.8	9.89463
212461_at	antizyme inhibitor 1	AZIN1	51582									1.08034e-06	21366.9	46815.4	2.19103	1.03359e-10	10660.5	36490.9	3.423	9.83486e-11	7407.75	24039.7	3.24521
201772_at	antizyme inhibitor 1	AZIN1	51582									1.77274e-06	26127.8	54300.1	2.07825	8.67615e-13	11372.7	54616.2	4.80242	1.55608e-14	7394	38238	5.17149
223374_s_at	beta-1,3-N-acetylgalactosaminyltransferase 1 (globoside blood group)	B3GALNT1	8706													1.15622e-05	673.025	#DIV/0!	#DIV/0!	4.79213e-05	2030.22	418.65	-4.84946
226233_at	beta-1,3-N-acetylgalactosaminyltransferase 2	B3GALNT2	148789									5.47588e-05	1321.1	427.6	-3.08957
222969_at	UDP-Gal:betaGlcNAc beta 1,3-galactosyltransferase, polypeptide 1	B3GALT1	8708																	7.75619e-06	1363.83	486.55	-2.80307
1553959_a_at	UDP-Gal:betaGal beta 1,3-galactosyltransferase polypeptide 6	B3GALT6	126792									0.000128294	2462.25	#DIV/0!	#DIV/0!
227083_at	beta 1,3-galactosyltransferase-like	B3GALTL	145173																	3.62193e-09	1292.73	308.8	-4.18631
227100_at	beta 1,3-galactosyltransferase-like	B3GALTL	145173																	8.8518e-06	1492.25	451.8	-3.3029
1554835_a_at	UDP-GlcNAc:betaGal beta-1,3-N-acetylglucosaminyltransferase 5	B3GNT5	84002													3.25666e-06	3550.57	12909.5	3.63589	5.63179e-09	2822.8	8889.88	3.14931
225612_s_at	UDP-GlcNAc:betaGal beta-1,3-N-acetylglucosaminyltransferase 5	B3GNT5	84002													2.73212e-06	15741.8	42488.6	2.69909	7.85396e-13	4610.2	35896.3	7.78628
1556134_a_at	UDP-GlcNAc:betaGal beta-1,3-N-acetylglucosaminyltransferase 5	B3GNT5	84002									0.00258624	454.775	1042	2.29124	3.3677e-05	315.2	1066.62	3.38396
213589_s_at	UDP-GlcNAc:betaGal beta-1,3-N-acetylglucosaminyltransferase-like 1	B3GNTL1	146712																	7.31187e-12	#DIV/0!	970.9	#DIV/0!
216627_s_at	UDP-Gal:betaGlcNAc beta 1,4- galactosyltransferase, polypeptide 1	B4GALT1	2683																	6.74507e-05	#DIV/0!	940.167	#DIV/0!
238987_at	UDP-Gal:betaGlcNAc beta 1,4- galactosyltransferase, polypeptide 1	B4GALT1	2683																	0.00420018	#DIV/0!	1504.33	#DIV/0!
210540_s_at	UDP-Gal:betaGlcNAc beta 1,4- galactosyltransferase, polypeptide 4	B4GALT4	8702					0.000219902	712.475	1906.35	2.67567	0.000610849	479.9	1256.05	2.61732
221484_at	UDP-Gal:betaGlcNAc beta 1,4- galactosyltransferase, polypeptide 5	B4GALT5	9334									9.64446e-05	5138.43	17146.3	3.33687	0.000134671	4334.05	12542.1	2.89385
221485_at	UDP-Gal:betaGlcNAc beta 1,4- galactosyltransferase, polypeptide 5	B4GALT5	9334					9.23614e-12	8988.38	29562	3.28891	2.6882e-13	4907.08	19303.2	3.93376	7.80993e-13	3793.82	15007.6	3.9558
206233_at	UDP-Gal:betaGlcNAc beta 1,4- galactosyltransferase, polypeptide 6	B4GALT6	9331													0.0054524	1948.6	628.625	-3.09978	0.000770911	5638.85	1107.65	-5.09082
235333_at	UDP-Gal:betaGlcNAc beta 1,4- galactosyltransferase, polypeptide 6	B4GALT6	9331													0.00134492	1225.3	327.6	-3.74023	0.000374676	3575.7	834.3	-4.28587
226859_at	DnaJ-like protein	bA16L21.2.1	548645																	0.000192105	#DIV/0!	1600.7	#DIV/0!
222446_s_at	beta-site APP-cleaving enzyme 2	BACE2	25825													3.6919e-07	919.25	336	-2.73586
221234_s_at	BTB and CNC homology 1, basic leucine zipper transcription factor 2	BACH2	60468													5.05439e-05	950.475	312.625	-3.0403	0.000176451	1311.53	492.5	-2.66299
236796_at	BTB and CNC homology 1, basic leucine zipper transcription factor 2	BACH2	60468													7.52206e-05	1301.25	519.175	-2.50638
209364_at	BCL2-antagonist of cell death	BAD	572													0.00327158	#DIV/0!	1881	#DIV/0!
202387_at	BCL2-associated athanogene	BAG1	573																	1.21054e-07	1924.4	4207.05	2.18616
209406_at	BCL2-associated athanogene 2	BAG2	9532																	2.27531e-05	1052.8	292.4	-3.60055
202984_s_at	BCL2-associated athanogene 5	BAG5	9529									0.00292555	3662.53	1800.58	-2.03409
207712_at	B melanoma antigen	BAGE	574													9.12784e-05	1155.53	395.25	-2.92353	1.61792e-06	3054.58	698.425	-4.37352
1555409_a_at	myeloid/lymphoid or mixed-lineage leukemia 3 /// B melanoma antigen family, member 5 /// B melanoma antigen family, member 3 /// B melanoma antigen family, member 2	BAGE2 /// BAGE3 /// BAGE5 /// MLL3	58508 /// 85316 /// 85318 /// 85319																	3.47557e-07	3036.98	1086.88	-2.79423
1555408_at	B melanoma antigen family, member 4 /// B melanoma antigen family, member 2	BAGE2 /// BAGE4	85317 /// 85319																	2.92713e-06	3800.33	1504.9	-2.5253
1559048_at	BAH domain and coiled-coil containing 1	BAHCC1	57597																	0.000408137	2152.88	1016	-2.11897
205638_at	brain-specific angiogenesis inhibitor 3	BAI3	577																	0.00860754	987.4	461.3	-2.14047
219667_s_at	B-cell scaffold protein with ankyrin repeats 1	BANK1	55024																	0.000123755	1544.32	408.5	-3.78048
222915_s_at	B-cell scaffold protein with ankyrin repeats 1	BANK1	55024													0.00565858	880.8	318.7	-2.76373	0.00147166	1460.33	511.3	-2.8561
1558662_s_at	B-cell scaffold protein with ankyrin repeats 1	BANK1	55024																	8.04596e-10	2648.15	#DIV/0!	#DIV/0!
228928_x_at	BTG3 associated nuclear protein	BANP	54971																	1.3276e-07	5778.62	12924.3	2.23657
219966_x_at	BTG3 associated nuclear protein /// similar to BTG3 associated nuclear protein isoform a	BANP /// LOC649800	54971																	3.0653e-07	6257.95	13233.1	2.11461
201419_at	BRCA1 associated protein-1 (ubiquitin carboxy-terminal hydrolase)	BAP1	8314																	1.42951e-06	#DIV/0!	2476.3	#DIV/0!
202391_at	brain abundant, membrane attached signal protein 1	BASP1	10409																	1.62044e-10	46980.3	164227	3.49567
211948_x_at	BAT2 domain containing 1	BAT2D1	23215																	9.3202e-07	4994.15	11450.4	2.29276
211946_s_at	BAT2 domain containing 1	BAT2D1	23215																	3.50416e-11	10876	25147	2.31216
214055_x_at	BAT2 domain containing 1	BAT2D1	23215																	1.60161e-09	5684.38	16525.6	2.90719
211947_s_at	BAT2 domain containing 1	BAT2D1	23215																	3.04685e-11	#DIV/0!	2533.95	#DIV/0!
201255_x_at	HLA-B associated transcript 3	BAT3	7917																	2.2502e-10	5133.9	13546.2	2.63858
210208_x_at	HLA-B associated transcript 3	BAT3	7917																	8.78629e-14	5892.6	21249.5	3.60613
213318_s_at	HLA-B associated transcript 3	BAT3	7917																	9.85081e-14	5397.45	19778.9	3.66449
225476_at	HLA-B associated transcript 4	BAT4	7918																	0.00316622	#DIV/0!	1444.83	#DIV/0!
217985_s_at	bromodomain adjacent to zinc finger domain, 1A	BAZ1A	11177																	2.6375e-08	5610.05	16001.5	2.8523
203080_s_at	bromodomain adjacent to zinc finger domain, 2B	BAZ2B	29994					6.28829e-05	8120.3	3723.77	-2.18066	0.000394553	15438.1	7357.02	-2.09842
211692_s_at	BCL2 binding component 3	BBC3	27113																	2.88656e-06	#DIV/0!	2090.35	#DIV/0!
219487_at	Bardet-Biedl syndrome 10	BBS10	79738					2.41347e-05	541.6	198.675	-2.72606	5.26286e-05	772.375	226.55	-3.40929	3.39419e-06	1003.23	228.65	-4.3876	4.94917e-06	1698.82	503.25	-3.37571
223227_at	Bardet-Biedl syndrome 2	BBS2	583									0.000341091	843.85	406.15	-2.07768	7.20205e-06	1351.8	468.825	-2.88338
212745_s_at	Bardet-Biedl syndrome 4	BBS4	585																	0.000307163	#DIV/0!	1296.75	#DIV/0!
235007_at	Bardet-Biedl syndrome 7	BBS7	55212													0.000741404	547.65	245.067	-2.2347	1.25051e-06	1225.08	448.8	-2.72967
225674_at	B-cell receptor-associated protein 29	BCAP29	55973																	1.08285e-05	2597.57	1225.3	-2.11995
203053_at	breast carcinoma amplified sequence 2	BCAS2	10286													4.70812e-05	4606.92	9514.2	2.0652	6.78353e-06	3846.5	9367.58	2.43535
227322_s_at	BRCA2 and CDKN1A interacting protein	BCCIP	56647													5.66191e-05	2043.28	983.525	-2.0775
234979_at	BCDIN3 domain containing	BCDIN3D	144233													1.27213e-06	815.6	282.5	-2.88708
202331_at	branched chain keto acid dehydrogenase E1, alpha polypeptide	BCKDHA	593					0.000685306	680.9	2231.43	3.27717	1.28252e-05	1022.37	4117.3	4.02722	2.02865e-06	1839.7	5171.82	2.81123	3.74738e-12	#DIV/0!	7090.92	#DIV/0!
202030_at	branched chain ketoacid dehydrogenase kinase	BCKDK	10295																	1.51398e-12	2060.8	4693.1	2.27732
205263_at	B-cell CLL/lymphoma 10	BCL10	8915																	9.90353e-18	4002.38	12921.8	3.22854
1557257_at	B-cell CLL/lymphoma 10	BCL10	8915													7.60051e-07	925.775	2423.95	2.61829
219497_s_at	B-cell CLL/lymphoma 11A (zinc finger protein)	BCL11A	53335																	2.57249e-07	3560.5	754.475	-4.71918
222891_s_at	B-cell CLL/lymphoma 11A (zinc finger protein)	BCL11A	53335													0.00102586	1426.15	612.733	-2.32752	3.00158e-09	3604.73	808.033	-4.46111
1559078_at	B-cell CLL/lymphoma 11A (zinc finger protein)	BCL11A	53335																	7.91158e-07	4483.57	1027.6	-4.36315
219498_s_at	B-cell CLL/lymphoma 11A (zinc finger protein)	BCL11A	53335																	2.89671e-07	2667.23	756.3	-3.52668
222895_s_at	B-cell CLL/lymphoma 11B (zinc finger protein)	BCL11B	64919																	5.23592e-05	2387.03	752.567	-3.17185
219528_s_at	B-cell CLL/lymphoma 11B (zinc finger protein)	BCL11B	64919																	4.20277e-05	1782.53	571.625	-3.11835
203685_at	B-cell CLL/lymphoma 2	BCL2	596													0.000931026	866.925	395.675	-2.191	0.000322558	1376.48	571.1	-2.41022
205681_at	BCL2-related protein A1	BCL2A1	597													1.7693e-08	27394	117369	4.28448	2.85396e-13	20428	157014	7.68623
223664_x_at	BCL2-like 13 (apoptosis facilitator)	BCL2L13	23786																	0.000212285	#DIV/0!	1967.7	#DIV/0!
204908_s_at	B-cell CLL/lymphoma 3	BCL3	602					3.05211e-10	9167.28	27446.7	2.99398	3.36531e-13	3941.65	16453.6	4.17429	1.04055e-12	3690.05	15895.6	4.3077	1.62831e-11	3074.75	10645.8	3.46234
204907_s_at	B-cell CLL/lymphoma 3	BCL3	602													1.24304e-06	709.4	1976.8	2.78658	0.000198126	#DIV/0!	1321.28	#DIV/0!
215990_s_at	B-cell CLL/lymphoma 6 (zinc finger protein 51)	BCL6	604																	6.69892e-07	4383.6	8902.77	2.03093
203140_at	B-cell CLL/lymphoma 6 (zinc finger protein 51)	BCL6	604																	1.44035e-10	18001.8	42552.9	2.36381
223566_s_at	BCL6 co-repressor	BCOR	54880																	0.000610981	1018.77	2356.97	2.31354
202315_s_at	breakpoint cluster region	BCR	613									0.00012719	1656.15	824.7	-2.00818	4.61636e-05	971.375	366.6	-2.64969
211715_s_at	3-hydroxybutyrate dehydrogenase, type 1	BDH1	622																	3.50281e-05	1649.93	#DIV/0!	#DIV/0!
218285_s_at	3-hydroxybutyrate dehydrogenase, type 2	BDH2	56898													0.0002336	678.5	#DIV/0!	#DIV/0!	5.40285e-06	1303.43	400.7	-3.25289
239367_at	brain-derived neurotrophic factor	BDNF	627																	0.0096631	1551.17	575.4	-2.69581
1567361_at	brain-derived neurotrophic factor opposite strand	BDNFOS	497258																	0.00231466	1706.85	311.233	-5.48415
226290_at	B double prime 1, subunit of RNA polymerase III transcription initiation factor IIIB	BDP1	55814																	5.30209e-07	1404.68	491.425	-2.85837
207671_s_at	bestrophin 1	BEST1	7439																	1.19581e-08	1422.27	4908.55	3.45122
1554443_s_at	bestrophin 1	BEST1	7439																	1.76864e-08	#DIV/0!	2724.88	#DIV/0!
1554442_at	bestrophin 1	BEST1	7439																	2.67759e-05	#DIV/0!	6057.9	#DIV/0!
201169_s_at	basic helix-loop-helix domain containing, class B, 2	BHLHB2	8553	1.32144e-05	5746.3	15435.5	2.68617	1.76716e-07	4159.2	17125.3	4.11744	2.30059e-11	4501.8	33716.4	7.48954	2.41589e-13	3050.67	38480	12.6136	1.44615e-15	5703.8	35896.8	6.29349
201170_s_at	basic helix-loop-helix domain containing, class B, 2	BHLHB2	8553					3.4472e-06	21567.6	64555.8	2.99319	2.53625e-06	21637.1	62728.9	2.89914	1.98857e-10	14030.2	82042.2	5.84755	5.08545e-13	12126.1	89346.8	7.36812
1569674_at	Basic helix-loop-helix domain containing, class B, 9	BHLHB9	80823																	0.0224191	1236.9	419.6	-2.94781
229437_at	BIC transcript	BIC	114614					0.00205564	194.6	1133.03	5.82233
220580_at	bicaudal C homolog 1 (Drosophila)	BICC1	80114																	0.000185355	1016.5	395.5	-2.57016
212702_s_at	bicaudal D homolog 2 (Drosophila)	BICD2	23299					1.40163e-05	5798.1	2069.78	-2.80132	7.92026e-06	6654.02	2273.42	-2.92687	0.000629921	3836.22	1627.35	-2.35734
209203_s_at	bicaudal D homolog 2 (Drosophila)	BICD2	23299					3.52488e-07	6027.1	1668.88	-3.61147	1.14406e-07	6974.8	1800.85	-3.87306
213154_s_at	bicaudal D homolog 2 (Drosophila)	BICD2	23299					4.61298e-06	10469	3504.78	-2.98705	6.05733e-07	12122.5	3343.65	-3.62554
1553021_s_at	bicaudal D homolog 2 (Drosophila)	BICD2	23299									0.000580945	1608.83	630.7	-2.55086
227143_s_at	BH3 interacting domain death agonist	BID	637																	2.14805e-07	10050.7	20854.4	2.07492
204493_at	BH3 interacting domain death agonist	BID	637																	4.71135e-10	5598.3	14494.2	2.58904
211725_s_at	BH3 interacting domain death agonist	BID	637																	4.02115e-08	10233.7	28015.8	2.73762
219191_s_at	bridging integrator 2	BIN2	51411									1.66369e-06	8248.67	4119	-2.00259	2.04733e-10	8637.4	2655.78	-3.25231	6.17477e-11	5698.7	1890.72	-3.01403
210538_s_at	baculoviral IAP repeat-containing 3	BIRC3	330					5.86335e-05	3820.35	12522.4	3.27782	1.66284e-05	2598.88	10472.8	4.02974	1.27035e-06	2218.3	9806.65	4.4208	0.000253035	3452.92	8527.17	2.46955
225859_at	baculoviral IAP repeat-containing 4	BIRC4	331																	3.18662e-07	2912.5	7115.15	2.44297
228363_at	baculoviral IAP repeat-containing 4	BIRC4	331																	9.88215e-11	3975.25	10043.7	2.52655
225858_s_at	baculoviral IAP repeat-containing 4	BIRC4	331																	7.2391e-10	3368.45	10654.9	3.16315
206536_s_at	baculoviral IAP repeat-containing 4	BIRC4	331													8.9383e-08	796.95	2168.93	2.72153
1569289_at	Basic, immunoglobulin-like variable motif containing	BIVM	54841																	0.011081	2310.12	594.933	-3.883
222761_at	basic, immunoglobulin-like variable motif containing	BIVM	54841													0.00153645	974.867	184.4	-5.2867	0.000810308	1820.8	883.2	-2.06159
207655_s_at	B-cell linker	BLNK	29760													0.0013534	890.85	351.333	-2.53563	4.32129e-06	3029.4	477.533	-6.34385
211729_x_at	biliverdin reductase A	BLVRA	644					0.000105225	5521.03	2367.18	-2.33233	0.000252245	7833.95	3694.32	-2.12054	7.51802e-06	6453.65	2335.45	-2.76334	0.000603779	3759.77	1850.42	-2.03184
203773_x_at	biliverdin reductase A	BLVRA	644									0.000387999	6443.7	3045.97	-2.11548	1.14933e-05	5738.3	2118.33	-2.70889
202201_at	biliverdin reductase B (flavin reductase (NADPH))	BLVRB	645																	0.00102125	#DIV/0!	1907.25	#DIV/0!
210462_at	basic leucine zipper nuclear factor 1 (JEM-1)	BLZF1	8548																	0.00030131	1268.3	#DIV/0!	#DIV/0!
37170_at	BMP2 inducible kinase	BMP2K	55589					9.3237e-05	2412.8	1129.68	-2.13584
219546_at	BMP2 inducible kinase	BMP2K	55589					0.000168928	13025.6	6132.05	-2.12419
59644_at	BMP2 inducible kinase	BMP2K	55589					6.97196e-05	13945.9	6876.85	-2.02795
205431_s_at	bone morphogenetic protein 5	BMP5	653																	0.000211597	1945.15	522.267	-3.72444
206176_at	bone morphogenetic protein 6	BMP6	654									1.37045e-06	15917.3	3941.9	-4.03798					0.00319728	1306.7	2881.03	2.20481
204832_s_at	bone morphogenetic protein receptor, type IA	BMPR1A	657																	0.00394184	3067.38	834.2	-3.67703
213578_at	bone morphogenetic protein receptor, type IA	BMPR1A	657																	0.00335121	996.4	350.2	-2.84523
225144_at	bone morphogenetic protein receptor, type II (serine/threonine kinase)	BMPR2	659																	0.00169327	1292.23	465.067	-2.7786
238516_at	bone morphogenetic protein receptor, type II (serine/threonine kinase)	BMPR2	659																	0.0122118	661	#DIV/0!	#DIV/0!
231106_at	BMS1 pseudogene 5 /// centaurin, gamma-like family, member 6 /// centaurin, gamma-like family, member 7	BMS1P5 /// CTGLF6 /// CTGLF7	399761													2.70475e-05	2036.25	815.425	-2.49716	0.00017957	3767.77	1702.83	-2.21265
239151_at	BMS1 pseudogene 5 /// hypothetical protein LOC643564	BMS1P5 /// LOC643564	642517													3.12994e-05	1193.78	449.5	-2.65578	6.86479e-06	2944.32	1022.48	-2.87961
235723_at	basonuclin 2	BNC2	54796																	0.00516213	3117.55	655.2	-4.75817
230722_at	basonuclin 2	BNC2	54796																	0.000240147	2565.68	635	-4.04043
238478_at	basonuclin 2	BNC2	54796																	0.00128118	1438.9	472.6	-3.04465
209308_s_at	BCL2/adenovirus E1B 19kDa interacting protein 2	BNIP2	663																	2.70799e-16	4231.85	12351.5	2.91871
201848_s_at	BCL2/adenovirus E1B 19kDa interacting protein 3	BNIP3	664	1.47977e-07	#DIV/0!	1492.28	#DIV/0!	2.45803e-13	180.1	5440.75	30.2096	5.59621e-12	166.4	5983.38	35.9578	9.86106e-10	#DIV/0!	6404.77	#DIV/0!	1.44322e-06	1515.6	6551.42	4.32266
201849_at	BCL2/adenovirus E1B 19kDa interacting protein 3	BNIP3	664	3.76047e-18	269.8	3941.15	14.6077	2.23554e-22	295.475	11908.6	40.3032	8.98594e-23	319.667	13499.9	42.231	1.3047e-19	625.575	13797.6	22.0558	6.61375e-16	1461.08	14182.5	9.70689
221479_s_at	BCL2/adenovirus E1B 19kDa interacting protein 3-like	BNIP3L	665					0.000689756	31611.2	72753.8	2.30152	0.00220829	38365.4	82021.5	2.1379	5.29421e-07	28952.2	114048	3.93918	6.22013e-14	16184.2	160741	9.93201
221478_at	BCL2/adenovirus E1B 19kDa interacting protein 3-like	BNIP3L	665					2.92268e-05	31755.9	79335.2	2.49828	0.000405571	35005.7	73512.8	2.10002	7.8624e-08	26056.6	97776.6	3.75248	5.33492e-16	11383.6	127466	11.1973
231500_s_at	BolA homolog 2 (E. coli)	BOLA2	552900													0.000573409	883.05	417.15	-2.11686	0.000148379	1539.42	753.3	-2.04357
241644_at	bolA homolog 2 (E. coli)	BOLA2	552900													0.00808271	653.3	#DIV/0!	#DIV/0!
205557_at	bactericidal/permeability-increasing protein	BPI	671																	1.61676e-08	9943.08	1969.8	-5.04776
230056_at	bromodomain PHD finger transcription factor	BPTF	2186																	0.0103638	705.667	333.767	-2.11425
232909_s_at	bromodomain PHD finger transcription factor	BPTF	2186													6.98715e-09	6289.92	2606.4	-2.41326
243829_at	v-raf murine sarcoma viral oncogene homolog B1	BRAF	673													5.4048e-09	2105.75	7226	3.43156	2.31162e-07	1313.05	3342.75	2.54579
206044_s_at	v-raf murine sarcoma viral oncogene homolog B1	BRAF	673									7.54159e-07	1268.42	2755.62	2.17248	3.3688e-06	1372.22	3208.03	2.33783
209922_at	BRCA1 associated protein	BRAP	8315																	8.79211e-11	#DIV/0!	1621.45	#DIV/0!
209923_s_at	BRCA1 associated protein	BRAP	8315																	6.11736e-09	#DIV/0!	2021.78	#DIV/0!
214727_at	breast cancer 2, early onset	BRCA2	675																	0.00265694	809.4	202.85	-3.99014
208685_x_at	bromodomain containing 2	BRD2	6046																	7.11983e-07	5659	11588.9	2.04787
214911_s_at	bromodomain containing 2	BRD2	6046																	1.69149e-08	6115.47	15463.9	2.52865
208686_s_at	bromodomain containing 2	BRD2	6046																	1.84292e-07	1670.25	5016.95	3.00371
203825_at	bromodomain containing 3	BRD3	8019					1.81591e-05	5872.23	2735.08	-2.14701
205550_s_at	brain and reproductive organ-expressed (TNFRSF1A modulator)	BRE	9577																	1.37023e-10	2349.2	5325.08	2.26676
211566_x_at	brain and reproductive organ-expressed (TNFRSF1A modulator)	BRE	9577																	6.5426e-07	#DIV/0!	2794.9	#DIV/0!
212645_x_at	brain and reproductive organ-expressed (TNFRSF1A modulator)	BRE	9577																	1.88555e-05	#DIV/0!	3247.1	#DIV/0!
223376_s_at	brain protein I3	BRI3	25798													8.84902e-06	32025.6	64134	2.00259	2.09088e-13	17628.1	71711.4	4.06802
231810_at	BRI3 binding protein	BRI3BP	140707					5.00087e-09	2160.85	643.75	-3.35666	9.21712e-10	3498.57	938.725	-3.72694	2.38566e-07	3703.57	1324.12	-2.797
215631_s_at	breast cancer metastasis suppressor 1	BRMS1	25855																	2.66721e-08	#DIV/0!	4963.83	#DIV/0!
224484_s_at	breast cancer metastasis-suppressor 1-like	BRMS1L	84312																	0.00011866	850.875	363.1	-2.34336
226580_at	breast cancer metastasis-suppressor 1-like	BRMS1L	84312													4.05765e-05	870.525	#DIV/0!	#DIV/0!	2.50202e-05	1834.58	#DIV/0!	#DIV/0!
225217_s_at	bromodomain and PHD finger containing, 3	BRPF3	27154					7.02529e-10	2997.68	10119.9	3.37592	1.23734e-05	1994.03	4153.28	2.08286
207369_at	bombesin-like receptor 3	BRS3	680																	0.0022286	1378.9	578.95	-2.38173
227775_at	bruno-like 6, RNA binding protein (Drosophila)	BRUNOL6	60677													0.00156044	467.225	1159.5	2.48167
244622_at	Bromodomain and WD repeat domain containing 1	BRWD1	54014																	0.00845207	1414.92	542.567	-2.60784
218090_s_at	bromodomain and WD repeat domain containing 2	BRWD2	55717													0.0141613	1309.48	522.067	-2.50825	0.00376754	1900.85	682.8	-2.7839
229694_at	bromodomain and WD repeat domain containing 2	BRWD2	55717													0.00172674	1489.4	572.8	-2.60021	0.00104951	2897.8	#DIV/0!	#DIV/0!
1553252_a_at	bromodomain and WD repeat domain containing 3	BRWD3	254065																	1.13373e-06	1705.85	4968.5	2.91262
235156_at	bromodomain and WD repeat domain containing 3	BRWD3	---																	0.000103595	#DIV/0!	1209.47	#DIV/0!
222200_s_at	BSD domain containing 1	BSDC1	55108																	8.57613e-07	2322.93	5692.25	2.45047
205715_at	bone marrow stromal cell antigen 1	BST1	683																	0.000350911	#DIV/0!	1757.07	#DIV/0!
201641_at	bone marrow stromal cell antigen 2	BST2	684													0.000148048	1529.25	403.8	-3.78715	2.83445e-05	1906.03	#DIV/0!	#DIV/0!
228570_at	BTB (POZ) domain containing 11	BTBD11	121551									6.34992e-06	792.125	310	-2.55524	1.99508e-10	1200.67	#DIV/0!	#DIV/0!
239687_at	BTB (POZ) domain containing 12	BTBD12	84464																	0.000103173	1312.93	577.1	-2.27505
202946_s_at	BTB (POZ) domain containing 3	BTBD3	22903																	0.00265782	1246.87	#DIV/0!	#DIV/0!
225389_at	BTB (POZ) domain containing 6	BTBD6	90135													2.43345e-08	3129.02	1434.73	-2.18092	2.36623e-10	3434.95	1379.12	-2.49067
224945_at	BTB (POZ) domain containing 7	BTBD7	55727													8.72261e-08	2683.43	1211.6	-2.21478
214116_at	biotinidase	BTD	686													0.000538932	833.6	371.8	-2.24207
226963_at	basic transcription factor 3-like 4	BTF3L4	91408																	3.10767e-10	3189.55	7784.05	2.44049
1559975_at	B-cell translocation gene 1, anti-proliferative	BTG1	694																	2.20001e-06	1163.57	348.8	-3.33594
200921_s_at	B-cell translocation gene 1, anti-proliferative	BTG1	694																	1.0656e-06	52872.9	133197	2.51919
200920_s_at	B-cell translocation gene 1, anti-proliferative	BTG1	694																	7.61161e-10	32103.3	118392	3.68784
215425_at	BTG family, member 3	BTG3	10950													0.00258985	700.775	196.2	-3.57174	3.5127e-05	2046.45	688.15	-2.97384
213134_x_at	BTG family, member 3	BTG3	10950					0.00108891	880.5	2796.38	3.17589
1554362_at	B-cell translocation gene 4	BTG4	54766																	0.00157496	1296.68	#DIV/0!	#DIV/0!
205504_at	Bruton agammaglobulinemia tyrosine kinase	BTK	695									0.000360671	1970.35	970.2	-2.03087	5.12745e-07	2029.1	690.633	-2.93803	2.24064e-07	2084.3	907.6	-2.2965
205299_s_at	butyrophilin, subfamily 2, member A2	BTN2A2	10385													3.07087e-06	561.6	1430.7	2.54754	1.51203e-05	#DIV/0!	1017.9	#DIV/0!
209770_at	butyrophilin, subfamily 3, member A1	BTN3A1	11119									0.00109125	15277.3	7478.33	-2.04288
212613_at	butyrophilin, subfamily 3, member A2	BTN3A2	11118													0.00434611	3785.75	1684.95	-2.2468	0.0021321	3503.7	1528.15	-2.29277
209846_s_at	butyrophilin, subfamily 3, member A2	BTN3A2	11118													0.00291914	6279.82	2776.6	-2.2617
204820_s_at	butyrophilin, subfamily 3, member A3 /// butyrophilin, subfamily 3, member A2	BTN3A2 /// BTN3A3	10384 /// 11118					0.00049821	13247	6389.43	-2.07328					5.12035e-05	13590.5	5711.23	-2.3796
204821_at	butyrophilin, subfamily 3, member A3	BTN3A3	10384									4.17167e-05	3944.8	1393.7	-2.83045	0.0011114	2723.35	1118	-2.43591	8.87609e-07	2291.47	717.8	-3.19236
38241_at	butyrophilin, subfamily 3, member A3	BTN3A3	10384					0.000610788	1999.9	981.875	-2.03682	2.72302e-05	3563.65	1500.35	-2.37521					0.000202086	1927.7	864.225	-2.23055
209974_s_at	BUB3 budding uninhibited by benzimidazoles 3 homolog (yeast)	BUB3	9184					0.000326668	2808.78	1383.58	-2.03009	8.32174e-05	3838.07	1773.32	-2.16434	0.000260797	3588.95	1615.4	-2.22171
201458_s_at	BUB3 budding uninhibited by benzimidazoles 3 homolog (yeast)	BUB3	9184									5.66332e-05	2744.15	1220.88	-2.24769
205690_s_at	BUD31 homolog (S. cerevisiae)	BUD31	8896																	2.09115e-13	4540.15	13137.7	2.89368
234243_at	brix domain containing 5	BXDC5	80135																	0.00685874	1962.7	597.5	-3.28485
205839_s_at	benzodiazapine receptor (peripheral) associated protein 1	BZRAP1	9256																	7.80198e-06	1295.1	433.7	-2.98617
200777_s_at	basic leucine zipper and W2 domains 1 /// similar to basic leucine zipper and W2 domains 1	BZW1 /// LOC151579	9689					4.32822e-12	15615.9	38657.8	2.47555	9.09913e-10	15343.2	31137.3	2.02939	2.15375e-15	10352.6	37192.1	3.59254	1.52558e-19	6920.38	35306.7	5.10185
200776_s_at	basic leucine zipper and W2 domains 1 /// similar to basic leucine zipper and W2 domains 1	BZW1 /// LOC151579	151579 /// 9689					1.07419e-08	17183.5	38994.4	2.26929	3.36822e-08	14523.4	31003.9	2.13476	2.67605e-14	8489.8	36542.9	4.30433	4.1506e-18	5980.55	36025.5	6.02377
224667_x_at	chromosome 10 open reading frame 104	C10orf104	119504																	5.1639e-08	43502	21565.1	-2.01724
229145_at	chromosome 10 open reading frame 104	C10orf104	119504									2.9401e-08	5997.55	13273.2	2.2131	1.33968e-10	5027.05	13331.8	2.652	6.43249e-14	3594.25	12766.4	3.55188
224664_at	chromosome 10 open reading frame 104	C10orf104	119504									1.37193e-10	19681.8	46143.4	2.34447	4.6859e-15	15438.8	57819.8	3.7451	2.26021e-19	9954.73	54611	5.48594
224665_at	chromosome 10 open reading frame 104	C10orf104	119504									1.6112e-09	8552.1	21398.5	2.50213	7.49375e-15	5439.43	23510.5	4.32224	2.03659e-19	3103.57	22606.8	7.28413
1557548_at	chromosome 10 open reading frame 108	C10orf108	414235																	0.00235586	768.4	354.7	-2.16634
220703_at	chromosome 10 open reading frame 110	C10orf110	55853																	0.0148935	831.875	379.267	-2.19338
229399_at	chromosome 10 open reading frame 118	C10orf118	55088																	0.000111358	964.525	1958.93	2.03097
227701_at	chromosome 10 open reading frame 118	C10orf118	55088																	7.79669e-07	2154.03	4451.32	2.06652
217905_at	chromosome 10 open reading frame 119	C10orf119	79892													0.000335785	2158.22	931.275	-2.31749	2.65129e-06	1939.48	698.7	-2.77583
213410_at	chromosome 10 open reading frame 137	C10orf137	26098									3.98441e-05	3423.4	1659.58	-2.06282	0.000209159	3487.12	1695.78	-2.05636
227777_at	chromosome 10 open reading frame 18	C10orf18	54906																	2.58351e-06	1509.95	672.25	-2.24611
238795_at	chromosome 10 open reading frame 18	C10orf18	54906													0.000140361	1012.7	488.9	-2.07138
212502_at	chromosome 10 open reading frame 22	C10orf22	84890													0.000366258	1262.05	580.1	-2.17557	3.54426e-06	2164.62	688.233	-3.14519
212500_at	chromosome 10 open reading frame 22	C10orf22	84890													1.72799e-06	828.025	217.5	-3.80701
202808_at	chromosome 10 open reading frame 26	C10orf26	54838									5.5365e-07	24579.2	11933.9	-2.05962
228374_at	chromosome 10 open reading frame 28	C10orf28	27291													0.000141125	#DIV/0!	3094.05	#DIV/0!	1.77937e-13	#DIV/0!	3281.35	#DIV/0!
210455_at	chromosome 10 open reading frame 28	C10orf28	27291													7.6333e-06	1061.85	2129.62	2.00558
212771_at	chromosome 10 open reading frame 38	C10orf38	221061													1.44198e-05	1114.08	462.133	-2.41072	1.97161e-06	2438.38	1026.2	-2.37612
226398_s_at	chromosome 10 open reading frame 4	C10orf4	118924													0.0111252	1492.05	512.9	-2.90905
227136_s_at	Chromosome 10 open reading frame 46	C10orf46	143384																	4.48067e-08	1903.8	506.2	-3.76096
225373_at	chromosome 10 open reading frame 54	C10orf54	64115																	1.11976e-06	12305.2	29460.7	2.39417
225372_at	chromosome 10 open reading frame 54	C10orf54	64115									2.60471e-05	24886.9	11253.1	-2.21155	0.000839787	9594.65	4092.22	-2.3446
1557531_a_at	chromosome 10 open reading frame 55	C10orf55	414236									0.00416196	253.1	778	3.07388	0.00037469	#DIV/0!	1050.6	#DIV/0!	3.4014e-06	#DIV/0!	647.175	#DIV/0!
228155_at	chromosome 10 open reading frame 58	C10orf58	84293																	0.00134978	1255.72	606.9	-2.06908
223824_at	chromosome 10 open reading frame 59	C10orf59	55328																	0.000856626	1423.53	529.175	-2.69008
203481_at	chromosome 10 open reading frame 6	C10orf6	55719									2.40317e-06	914.275	401.875	-2.27502	6.97009e-08	1375.75	589.5	-2.33376
1553863_at	chromosome 10 open reading frame 64	C10orf64	57705																	2.52208e-05	1446.97	#DIV/0!	#DIV/0!
239093_at	chromosome 10 open reading frame 65	C10orf65	112817													0.00536932	506.333	216.6	-2.33764
1553845_x_at	chromosome 10 open reading frame 67	C10orf67	256815													0.000555176	1280.55	517.35	-2.47521	1.04991e-05	2860.9	948.7	-3.0156
55662_at	chromosome 10 open reading frame 76	C10orf76	79591																	0.00667855	#DIV/0!	539.6	#DIV/0!
236027_at	chromosome 10 open reading frame 78	C10orf78	119392													1.64357e-05	1359.85	3864.65	2.84197	8.91282e-05	1462.95	3627.82	2.4798
238794_at	chromosome 10 open reading frame 78	C10orf78	119392													0.000573268	1106.48	2322.88	2.09935
1557544_at	chromosome 10 open reading frame 80	C10orf80	159686									2.46615e-05	777.925	1742.55	2.24
222852_at	chromosome 10 open reading frame 88	C10orf88	80007													0.00233947	882.575	436.1	-2.02379	0.0085277	1553.37	627.2	-2.47667
218213_s_at	chromosome 11 open reading frame 10	C11orf10	746													1.58996e-08	6998.83	19004.6	2.7154	7.16207e-15	5650.35	38523.7	6.81793
220560_at	chromosome 11 open reading frame 21	C11orf21	29125									8.39913e-06	3630.75	1475.15	-2.46128	2.68157e-09	5010.7	1068.08	-4.69134	6.85014e-10	5755.73	1338.72	-4.29941
1569349_at	chromosome 11 open reading frame 30	C11orf30	56946																	8.75549e-08	2916.68	954	-3.05731
228331_at	chromosome 11 open reading frame 31	C11orf31	280636													0.00183595	530.15	1098.1	2.0713
1559623_at	Chromosome 11 open reading frame 54	C11orf54	28970																	0.000710283	1199.5	558.967	-2.14592
223268_at	chromosome 11 open reading frame 54	C11orf54	28970																	1.24019e-07	3080.35	6401.52	2.07818
229851_s_at	chromosome 11 open reading frame 54	C11orf54	28970																	3.91037e-05	3798.05	8134.52	2.14176
223009_at	chromosome 11 open reading frame 59	C11orf59	55004																	3.98262e-17	6142.35	20246.6	3.29623
221208_s_at	chromosome 11 open reading frame 61	C11orf61	79684													0.00664314	655.225	170.3	-3.84748	0.00426218	1218.3	414.833	-2.93684
1554764_a_at	chromosome 11 open reading frame 64	C11orf64	283197																	0.0117112	1045.12	320.1	-3.265
235402_at	chromosome 11 open reading frame 66	C11orf66	220004																	0.0146622	1115.67	#DIV/0!	#DIV/0!
221534_at	chromosome 11 open reading frame 68	C11orf68	83638																	1.01879e-06	#DIV/0!	3661.35	#DIV/0!
218789_s_at	chromosome 11 open reading frame 71	C11orf71	54494													1.21102e-05	775.525	352.05	-2.20288
219806_s_at	chromosome 11 open reading frame 75	C11orf75	56935													0.00353464	2832.95	7381.05	2.60543	0.0116524	2496.4	6093.77	2.44103
223048_at	chromosome 11 open reading frame 79	C11orf79	54949																	8.94798e-11	2053.38	4555.42	2.21851
238593_at	chromosome 11 open reading frame 80	C11orf80	79703													8.44219e-05	695.475	165.567	-4.20057	0.000150969	1413.08	405	-3.48907
221652_s_at	chromosome 12 open reading frame 11	C12orf11	55726					5.25689e-07	810.9	2234.3	2.75533	1.92961e-09	896.467	3795.47	4.23382	1.40924e-09	1380.55	5284.73	3.82799	1.59399e-07	2311.57	6595.88	2.85341
229018_at	chromosome 12 open reading frame 26	C12orf26	84190													1.81058e-06	1189.03	525.4	-2.26309
213701_at	chromosome 12 open reading frame 29	C12orf29	91298																	0.00163127	2194.85	445.85	-4.92284
225888_at	chromosome 12 open reading frame 30	C12orf30	80018																	0.0100532	1140	#DIV/0!	#DIV/0!
224446_at	chromosome 12 open reading frame 31	C12orf31	84298																	1.21005e-05	1830.02	3893.18	2.12739
227152_at	chromosome 12 open reading frame 35	C12orf35	55196																	5.11245e-10	10518.6	26320.7	2.5023
218614_at	chromosome 12 open reading frame 35	C12orf35	55196																	3.57899e-12	16644.8	43884.8	2.63655
218374_s_at	chromosome 12 open reading frame 4	C12orf4	57102																	6.5369e-07	1691.85	537.525	-3.14748
222613_at	chromosome 12 open reading frame 4	C12orf4	57102													3.08526e-06	745.75	245.025	-3.04357	3.01502e-05	1358.28	504.933	-2.69001
219817_at	chromosome 12 open reading frame 47	C12orf47	51275					0.00121098	747.433	#DIV/0!	#DIV/0!
220060_s_at	chromosome 12 open reading frame 48	C12orf48	55010																	0.00145113	1626.95	331.2	-4.91229
224147_at	chromosome 12 open reading frame 48	C12orf48	55010																	0.00253581	1085.87	#DIV/0!	#DIV/0!
222767_s_at	chromosome 12 open reading frame 49	C12orf49	79794																	2.20683e-08	#DIV/0!	2502.12	#DIV/0!
244378_at	Chromosome 12 open reading frame 51	C12orf51	283450													0.00178968	584.875	270.35	-2.1634
224719_s_at	chromosome 12 open reading frame 57	C12orf57	113246													0.00280124	926.65	421.6	-2.19794	3.01775e-05	3141.9	955.6	-3.28788
218723_s_at	chromosome 13 open reading frame 15	C13orf15	28984																	0.000943823	3229.27	638.625	-5.05661
219471_at	chromosome 13 open reading frame 18	C13orf18	728970 /// 80183																	4.35436e-07	4032.53	13224.1	3.27935
44790_s_at	chromosome 13 open reading frame 18	C13orf18	728970 /// 80183																	1.71807e-08	2656.88	13668.1	5.14442
240667_at	Chromosome 13 open reading frame 21	C13orf21	387923																	0.00202236	718.367	#DIV/0!	#DIV/0!
225887_at	chromosome 13 open reading frame 23	C13orf23	80209													1.71524e-06	944.25	311.8	-3.02838	6.40467e-06	1040.7	357.667	-2.90969
218420_s_at	chromosome 13 open reading frame 23	C13orf23	80209													1.94231e-07	1078.2	332.6	-3.24173
1553141_at	chromosome 13 open reading frame 31	C13orf31	144811																	4.46126e-06	1551.43	458.475	-3.38388
219303_at	chromosome 13 open reading frame 7	C13orf7	79596																	0.000126502	1812.85	796.233	-2.27678
226194_at	chromosome 13 open reading frame 8	C13orf8	283489									2.10504e-07	741.975	356.5	-2.08128	2.24858e-10	1008.25	369.1	-2.73164	2.21597e-11	1574.1	549.8	-2.86304
223547_at	chromosome 14 open reading frame 100	C14orf100	51528																	6.00064e-08	1539.78	498.175	-3.09083
219166_at	chromosome 14 open reading frame 104	C14orf104	55172					0.00218584	545.5	#DIV/0!	#DIV/0!
241816_at	Chromosome 14 open reading frame 106	C14orf106	55320													0.00227861	2214.7	1085.25	-2.04073
206500_s_at	chromosome 14 open reading frame 106	C14orf106	55320					2.90253e-06	868.55	261.1	-3.3265
226630_at	chromosome 14 open reading frame 106	C14orf106	55320					2.04575e-06	2012.08	926.925	-2.1707
218139_s_at	chromosome 14 open reading frame 108	C14orf108	55745																	2.4525e-07	3984.1	1856.5	-2.14603
213246_at	chromosome 14 open reading frame 109	C14orf109	26175																	4.88619e-12	1817.2	10157.5	5.58963
217645_at	chromosome 14 open reading frame 112	C14orf112	51241													3.45898e-05	625.4	#DIV/0!	#DIV/0!
229514_at	chromosome 14 open reading frame 118	C14orf118	55668																	0.00171188	#DIV/0!	1489.9	#DIV/0!
219972_s_at	chromosome 14 open reading frame 135	C14orf135	100130173 /// 64430																	7.17179e-05	841.075	2104.43	2.50207
219563_at	chromosome 14 open reading frame 139	C14orf139	79686																	0.00016907	#DIV/0!	3746.38	#DIV/0!
214264_s_at	chromosome 14 open reading frame 143	C14orf143	90141													0.000168582	817.075	380.9	-2.14512	1.08115e-06	1458.83	528.75	-2.75901
232814_x_at	Chromosome 14 open reading frame 153	C14orf153	84334													1.94017e-05	7542.25	3324.72	-2.26853	4.43241e-06	13739.5	5482.17	-2.50621
225948_at	chromosome 14 open reading frame 153	C14orf153	84334																	7.01553e-05	#DIV/0!	1918.5	#DIV/0!
218298_s_at	chromosome 14 open reading frame 159	C14orf159	80017					1.13421e-07	6534.93	2521.15	-2.59204	2.27926e-09	10310.9	3395	-3.03709	1.91198e-12	8029.18	1672.45	-4.80085	2.9264e-07	3823.05	1533.3	-2.49335
219526_at	chromosome 14 open reading frame 169	C14orf169	79697													4.90553e-05	996.1	381.4	-2.61169	3.43036e-06	1535.2	615.567	-2.49396
227029_at	chromosome 14 open reading frame 24	C14orf24	283635									7.4012e-06	2351.7	5261.65	2.23738	2.85874e-06	1704.58	3614.15	2.12026	1.02443e-06	1135.67	2453.32	2.16025
235369_at	chromosome 14 open reading frame 28	C14orf28	122525													0.000397377	1493.33	744.825	-2.00493
212643_at	chromosome 14 open reading frame 32	C14orf32	93487									4.73797e-07	12908.2	26204.4	2.03006	3.44055e-12	8216.33	23340.2	2.84072	6.29553e-13	5114.27	15204.5	2.97295
212497_at	chromosome 14 open reading frame 32	C14orf32	93487									0.00100482	575.775	1483	2.57566	5.5163e-07	#DIV/0!	1375.57	#DIV/0!	1.87684e-05	#DIV/0!	1019.62	#DIV/0!
212644_s_at	chromosome 14 open reading frame 32	C14orf32	93487													5.91251e-08	3080.4	8092.77	2.62718
1561985_at	chromosome 14 open reading frame 39	C14orf39	317761																	0.000151123	805.075	#DIV/0!	#DIV/0!
242608_x_at	Chromosome 14 open reading frame 44	C14orf44	145483													1.2825e-06	8159	3532.5	-2.3097
220173_at	chromosome 14 open reading frame 45	C14orf45	80127																	0.0151816	1262.87	483.067	-2.61427
1563524_a_at	chromosome 14 open reading frame 85	C14orf85	319085																	0.00186067	926.2	344.767	-2.68645
234594_at	chromosome 14 open reading frame 85	C14orf85	319085	1.13642e-05	1260.83	428.725	-2.94087	0.00190843	1879.55	938.625	-2.00245
219009_at	chromosome 14 open reading frame 93	C14orf93	60686					8.32805e-05	625.475	278.7	-2.24426
218383_at	chromosome 14 open reading frame 94	C14orf94	54930					1.10781e-06	4663.75	1744.68	-2.67313	1.0619e-05	5013.12	2108.67	-2.37738
242649_x_at	chromosome 15 open reading frame 21	C15orf21	283651									8.03365e-05	490.4	1589.53	3.24128	2.31991e-05	322.3	1418.97	4.40265
217898_at	chromosome 15 open reading frame 24	C15orf24	56851																	9.50425e-12	3218.4	8224.62	2.5555
218791_s_at	chromosome 15 open reading frame 29	C15orf29	79768																	5.61434e-07	1840.5	9706.98	5.2741
222745_s_at	chromosome 15 open reading frame 29	C15orf29	79768																	6.23879e-12	7881.78	77876.2	9.88054
1556588_at	chromosome 15 open reading frame 37	C15orf37	283687																	8.93752e-09	1510.72	4885.68	3.23399
204494_s_at	chromosome 15 open reading frame 39	C15orf39	56905																	1.55846e-07	5032.77	11277.1	2.24073
1552310_at	chromosome 15 open reading frame 40	C15orf40	123207													0.000125023	1405.78	668.225	-2.10374
1568801_at	chromosome 15 open reading frame 44	C15orf44	81556													0.00383785	642.9	178.7	-3.59765	0.0161792	810.933	397.4	-2.0406
223484_at	chromosome 15 open reading frame 48	C15orf48	84419													5.76095e-07	5959.95	108823	18.2591	7.08734e-08	21482.1	145201	6.75916
208109_s_at	chromosome 15 open reading frame 5	C15orf5	81698																	0.00770887	2410.65	660.05	-3.65222
227380_x_at	Chromosome 16 open reading frame 13	C16orf13	84326																	0.00532936	1564.28	715.767	-2.18545
227378_x_at	chromosome 16 open reading frame 13	C16orf13	84326																	0.000187011	#DIV/0!	1826.2	#DIV/0!
225861_at	chromosome 16 open reading frame 14	C16orf14	84331					3.95963e-07	591.175	2333.93	3.94794	8.89154e-09	532.05	2964.32	5.57152	5.60938e-08	927.625	4266.12	4.59898	9.59263e-06	1608.8	3658.03	2.27376
1553715_s_at	chromosome 16 open reading frame 14	C16orf14	84331					1.41735e-05	#DIV/0!	2862.67	#DIV/0!	1.7126e-06	#DIV/0!	3328.02	#DIV/0!	2.79291e-06	#DIV/0!	4633.27	#DIV/0!	3.59657e-06	#DIV/0!	3792.78	#DIV/0!
221064_s_at	chromosome 16 open reading frame 28	C16orf28	64718																	0.000248453	#DIV/0!	2373.4	#DIV/0!
219315_s_at	chromosome 16 open reading frame 30	C16orf30	79652																	2.68486e-06	1280.5	441.2	-2.90231
218493_at	chromosome 16 open reading frame 33	C16orf33	79622													2.98065e-05	2193.8	6823.45	3.11033
213105_s_at	chromosome 16 open reading frame 42	C16orf42	115939																	0.000503192	#DIV/0!	1533.85	#DIV/0!
212736_at	chromosome 16 open reading frame 45	C16orf45	89927																	2.79288e-05	1661.6	637.4	-2.60684
230721_at	chromosome 16 open reading frame 52	C16orf52	730094													0.000680747	1278.28	636.75	-2.0075
227351_at	chromosome 16 open reading frame 52	C16orf52	730094									0.000861762	900.3	367.6	-2.44913
1554119_at	chromosome 16 open reading frame 57	C16orf57	79650																	0.00534562	1174.97	499.175	-2.35382
1568954_s_at	chromosome 16 open reading frame 72	C16orf72	29035																	1.05465e-08	3388.4	7095.92	2.09418
1553990_at	chromosome 16 open reading frame 79	C16orf79	283870													0.0119034	1295.2	610.5	-2.12154
224447_s_at	chromosome 17 open reading frame 37	C17orf37	84299																	1.31592e-09	3722.83	9708.15	2.60774
220606_s_at	chromosome 17 open reading frame 48	C17orf48	56985																	0.000118219	#DIV/0!	2150.27	#DIV/0!
224574_at	chromosome 17 open reading frame 49 /// similar to DNA segment, Chr 11, Brigham & Womens Genetics 0434 expressed	C17orf49 /// MGC71993	124944 /// 440400													2.71232e-10	1859.72	5741.82	3.08746	4.24572e-14	1056.85	5590.02	5.28933
226901_at	chromosome 17 open reading frame 58	C17orf58	284018					0.000119235	339.025	785.025	2.31554	1.48887e-05	576.55	1490.9	2.5859	0.000146131	753.1	1926.3	2.55783	9.44292e-05	1016.9	2811.75	2.76502
219435_at	chromosome 17 open reading frame 68	C17orf68	80169													6.64022e-06	851.3	2791.03	3.27854	4.81412e-10	#DIV/0!	2795.68	#DIV/0!
1553486_a_at	chromosome 17 open reading frame 78	C17orf78	284099																	0.0112514	1438.8	461.8	-3.11563
225096_at	chromosome 17 open reading frame 79	C17orf79	55352					7.32563e-05	627.7	1256.4	2.00159									0.000258025	1468	3021.25	2.05807
223351_at	chromosome 17 open reading frame 80	C17orf80	55028													1.61965e-05	1218.93	480.333	-2.53766
223286_at	chromosome 17 open reading frame 81	C17orf81	23587																	2.82919e-05	1087.8	#DIV/0!	#DIV/0!
222779_s_at	chromosome 17 open reading frame 85	C17orf85	55421													6.8776e-06	1578.3	3159.15	2.00162	0.00125235	#DIV/0!	1755.25	#DIV/0!
209574_s_at	chromosome 18 open reading frame 1	C18orf1	753																	0.000185898	1315.03	470.7	-2.79376
207996_s_at	chromosome 18 open reading frame 1	C18orf1	753													0.00164284	695.5	284.55	-2.44421
1560751_at	chromosome 18 open reading frame 16	C18orf16	147429													0.00350542	846.375	#DIV/0!	#DIV/0!	0.00934652	2135.4	733.675	-2.91055
242149_at	chromosome 18 open reading frame 19	C18orf19	125228					2.98167e-10	137.9	1240.2	8.99347	4.79212e-10	143.8	2108.68	14.6639	1.38828e-07	491.35	2369.55	4.82253	4.14051e-05	749.1	2664.82	3.55737
230739_at	chromosome 18 open reading frame 19	C18orf19	125228	1.2614e-07	301.375	1531.65	5.08221	2.30491e-15	251.033	4601.35	18.3296	2.46575e-17	291.1	8129.3	27.9261	6.27365e-16	484.4	9173.75	18.9384	3.60998e-12	1097.6	10220.6	9.31177
235022_at	chromosome 18 open reading frame 19	C18orf19	125228	2.48632e-09	332.967	2358.62	7.08367	5.03381e-16	224.1	7094.98	31.6599	1.27667e-16	248.433	11402.4	45.8973	3.06658e-17	414	16680	40.2897	1.72985e-15	1491.15	25310.8	16.974
1553934_at	chromosome 18 open reading frame 20	C18orf20	221241																	0.0139268	1219.28	503.4	-2.42208
224957_at	chromosome 18 open reading frame 32	C18orf32	497661																	1.87182e-11	6879.78	23775.2	3.45581
1559716_at	chromosome 18 open reading frame 37	C18orf37	125476																	2.33143e-06	2986.5	1089.37	-2.7415
224493_x_at	chromosome 18 open reading frame 45	C18orf45	85019																	8.49895e-06	10008.4	3948.05	-2.53502
244495_x_at	chromosome 18 open reading frame 45	C18orf45	85019													6.32596e-05	10158.4	4854.88	-2.09242	3.07254e-06	17084	7395.85	-2.30995
232222_at	zinc finger, CCHC domain containing 2 /// chromosome 18 open reading frame 49	C18orf49 /// ZCCHC2	400653													4.19892e-07	2589.6	966.467	-2.67945
238480_at	Chromosome 18 open reading frame 50	C18orf50	---																	0.00132978	1273.3	220.3	-5.77985
1570552_at	chromosome 18 open reading frame 50	C18orf50	619463																	0.000115938	1152	341.8	-3.37039
229442_at	chromosome 18 open reading frame 54	C18orf54	162681																	6.60257e-05	6497	1331.25	-4.88038
241733_at	Chromosome 18 open reading frame 54	C18orf54	162681																	0.000630374	1850.08	401.7	-4.60561
225863_s_at	chromosome 19 open reading frame 12	C19orf12	83636													3.473e-06	1107.75	448.6	-2.46935
223983_s_at	chromosome 19 open reading frame 12	C19orf12	83636													0.00190538	596.833	#DIV/0!	#DIV/0!
222266_at	Chromosome 19 open reading frame 2	C19orf2	8725													1.5886e-06	1686	455.4	-3.70224	1.0374e-06	3254.38	915.45	-3.55495
214173_x_at	chromosome 19 open reading frame 2	C19orf2	8725													0.000707779	1230.7	#DIV/0!	#DIV/0!	0.000495808	1723.17	515.1	-3.34531
226516_at	chromosome 19 open reading frame 28	C19orf28	126321									3.68611e-05	#DIV/0!	2329.07	#DIV/0!	0.00380679	#DIV/0!	2833.28	#DIV/0!
229650_s_at	chromosome 19 open reading frame 42	C19orf42	79086					0.000136699	1318.38	583.55	-2.25923					0.000245896	1530.17	686.625	-2.22855
200076_s_at	chromosome 19 open reading frame 50	C19orf50	79036																	1.59496e-12	3498.82	9836.85	2.81147
235568_at	chromosome 19 open reading frame 59	C19orf59	199675													0.00266099	1762.1	4151.6	2.35605
212575_at	chromosome 19 open reading frame 6	C19orf6	91304																	0.0122877	#DIV/0!	1041.43	#DIV/0!
213390_at	chromosome 19 open reading frame 7	C19orf7	23211									3.02139e-07	5031.42	2194.95	-2.29227	7.74401e-08	4138.6	1644.47	-2.51668
219283_at	C1GALT1-specific chaperone 1	C1GALT1C1	29071					1.21669e-07	5034.15	2476.73	-2.03258
220235_s_at	chromosome 1 open reading frame 103	C1orf103	55791																	1.77322e-14	2595.57	6526.55	2.51449
217893_s_at	chromosome 1 open reading frame 108	C1orf108	79647																	1.29326e-07	3420.88	8219.35	2.4027
222458_s_at	chromosome 1 open reading frame 108	C1orf108	79647													4.51164e-06	5004.35	10566.6	2.11148	1.06245e-08	2657.35	7016.8	2.64053
222459_at	chromosome 1 open reading frame 108	C1orf108	79647																	8.03385e-11	2982.5	7990.98	2.67929
220193_at	chromosome 1 open reading frame 113	C1orf113	79729					6.18046e-05	2308.3	6962.53	3.0163	4.44638e-09	2437.65	15927.1	6.5338	2.30449e-10	3116.43	32181.6	10.3264	2.81775e-11	4268.2	33284.2	7.79819
222495_at	chromosome 1 open reading frame 119 /// similar to K07F5.15	C1orf119 /// LOC727778	56900																	8.28557e-15	8446.92	29137	3.44942
219875_s_at	chromosome 1 open reading frame 121	C1orf121	51029																	0.00614201	#DIV/0!	594.425	#DIV/0!
203197_s_at	chromosome 1 open reading frame 123	C1orf123	54987									2.07706e-05	1113.25	#DIV/0!	#DIV/0!
223124_s_at	chromosome 1 open reading frame 128	C1orf128	57095																	1.17452e-08	#DIV/0!	3674.22	#DIV/0!
226242_at	chromosome 1 open reading frame 131	C1orf131	128061									3.39006e-07	2429	985.825	-2.46393	1.10484e-05	2264.23	934.9	-2.42189
1557192_at	chromosome 1 open reading frame 136	C1orf136	---													0.00436788	1578.88	540.775	-2.91965	0.000604979	3338.52	1027.15	-3.25028
225244_at	chromosome 1 open reading frame 142	C1orf142	116841																	0.00518596	#DIV/0!	1446.77	#DIV/0!
212003_at	chromosome 1 open reading frame 144	C1orf144	26099																	1.20443e-08	#DIV/0!	2685.7	#DIV/0!
212004_at	chromosome 1 open reading frame 144	C1orf144	26099													1.61163e-08	2623.65	5754.6	2.19336
218165_at	chromosome 1 open reading frame 149	C1orf149	64769																	1.43036e-07	2936.67	1456.58	-2.01615
213528_at	chromosome 1 open reading frame 156	C1orf156	92342													1.86605e-05	1499.38	565.5	-2.65141
219337_at	chromosome 1 open reading frame 159	C1orf159	54991																	0.00821857	1190.13	#DIV/0!	#DIV/0!
52078_at	chromosome 1 open reading frame 160	C1orf160	84065																	2.53274e-09	#DIV/0!	2948.8	#DIV/0!
228532_at	chromosome 1 open reading frame 162	C1orf162	128346																	5.43175e-06	3416.68	1400.55	-2.43952
219988_s_at	chromosome 1 open reading frame 164	C1orf164	55182													2.72891e-05	2087.45	805.467	-2.5916
1561976_at	chromosome 1 open reading frame 167	C1orf167	284498																	6.98591e-06	1914.63	693.4	-2.76122
222000_at	chromosome 1 open reading frame 174	C1orf174	339448																	3.2293e-06	3074.65	6597.05	2.14563
46167_at	tetratricopeptide repeat domain 4 /// chromosome 1 open reading frame 175	C1orf175 /// TTC4	7268																	0.0213884	1218.97	550.225	-2.21541
1563743_at	chromosome 1 open reading frame 180	C1orf180	439927													0.006136	599.95	#DIV/0!	#DIV/0!
218932_at	chromosome 1 open reading frame 181	C1orf181	54680													0.00581255	577.4	206.4	-2.79748	0.0051388	873.675	#DIV/0!	#DIV/0!
229608_at	chromosome 1 open reading frame 183	C1orf183	55924									0.00016158	4128.07	1786.55	-2.31064
1564164_at	chromosome 1 open reading frame 218	C1orf218	163486																	7.77388e-08	7369.88	1269.7	-5.80442
219696_at	chromosome 1 open reading frame 218	C1orf218	163486													3.21487e-06	2305.95	889.225	-2.59321	2.90707e-05	2695.4	1211.62	-2.22462
223548_at	chromosome 1 open reading frame 26	C1orf26	54823																	3.56411e-06	#DIV/0!	1229.72	#DIV/0!
207571_x_at	chromosome 1 open reading frame 38	C1orf38	9473																	1.8108e-07	6879.93	16356.3	2.3774
210785_s_at	chromosome 1 open reading frame 38	C1orf38	9473																	2.20126e-06	8949.85	21957.1	2.45334
223034_s_at	chromosome 1 open reading frame 43	C1orf43	25912																	1.77191e-15	13006.7	54114	4.16048
1555226_s_at	chromosome 1 open reading frame 43	C1orf43	25912																	2.65103e-16	4783.47	20504	4.28641
1555225_at	chromosome 1 open reading frame 43	C1orf43	25912																	2.32274e-07	#DIV/0!	950.833	#DIV/0!
219406_at	chromosome 1 open reading frame 50	C1orf50	79078																	0.00315958	#DIV/0!	1025.3	#DIV/0!
244103_at	chromosome 1 open reading frame 55	C1orf55	163859																	1.29795e-09	3272.3	9097.8	2.78025
223272_s_at	chromosome 1 open reading frame 57	C1orf57	84284																	0.00747047	#DIV/0!	831.467	#DIV/0!
241908_at	Chromosome 1 open reading frame 58	C1orf58	148362																	1.08807e-08	1377.5	3435.55	2.49405
226128_at	chromosome 1 open reading frame 58	C1orf58	---																	5.57198e-12	7741.77	19315.1	2.49492
239078_at	chromosome 1 open reading frame 58	C1orf58	148362																	0.000300422	#DIV/0!	1487.87	#DIV/0!
225841_at	chromosome 1 open reading frame 59	C1orf59	113802					2.23666e-07	1481.35	564.525	-2.62406	9.42768e-08	2377.25	752.375	-3.15966	7.46595e-12	3255.05	595.567	-5.46547	5.14581e-09	3559.93	945.6	-3.76473
209007_s_at	chromosome 1 open reading frame 63	C1orf63	57035																	1.34432e-08	11374.3	24183.4	2.12615
209006_s_at	chromosome 1 open reading frame 63	C1orf63	57035																	4.82387e-08	7453.57	17436.7	2.33937
242283_at	chromosome 1 open reading frame 67	C1orf67	127602 /// 200095 /// 644364													7.67132e-05	798.75	162.6	-4.91236	8.44213e-05	1466.8	391.225	-3.74925
1554660_a_at	chromosome 1 open reading frame 71	C1orf71	163882																	2.43329e-05	#DIV/0!	1642.3	#DIV/0!
225550_at	chromosome 1 open reading frame 71	C1orf71	163882																	0.00105575	#DIV/0!	1775.72	#DIV/0!
225551_at	chromosome 1 open reading frame 71	C1orf71	163882																	0.00154715	#DIV/0!	2472.7	#DIV/0!
222752_s_at	chromosome 1 open reading frame 75	C1orf75	55248																	8.93615e-06	1688.47	533.2	-3.16668
202559_x_at	chromosome 1 open reading frame 77	C1orf77	26097																	1.51435e-07	#DIV/0!	6289.25	#DIV/0!
223774_at	chromosome 1 open reading frame 79	C1orf79	85028									0.00092153	#DIV/0!	890.8	#DIV/0!	0.0026642	#DIV/0!	1386.78	#DIV/0!	0.00118008	#DIV/0!	2143.77	#DIV/0!
223773_s_at	chromosome 1 open reading frame 79	C1orf79	85028									0.000687668	756.167	1870.4	2.47353
220199_s_at	chromosome 1 open reading frame 80	C1orf80	64853																	1.40301e-08	3264.38	1351.03	-2.41622
1558692_at	chromosome 1 open reading frame 85	C1orf85	112770																	0.00592548	#DIV/0!	1243.25	#DIV/0!
1558693_s_at	chromosome 1 open reading frame 85	C1orf85	112770																	0.0174716	#DIV/0!	1193.97	#DIV/0!
203429_s_at	chromosome 1 open reading frame 9	C1orf9	51430																	1.04885e-05	3755.95	9442.67	2.51406
231835_at	chromosome 1 open reading frame 93	C1orf93	127281									4.83859e-06	2469.6	15615.8	6.32322	8.21362e-10	2321.2	40242.1	17.3368	1.25066e-13	2311.4	41408.2	17.9148
1553698_a_at	chromosome 1 open reading frame 96	C1orf96	126731													2.01032e-05	338.375	1529.43	4.51991	7.62955e-07	387.6	898.075	2.31701
225904_at	chromosome 1 open reading frame 96	C1orf96	126731													1.17104e-10	6927.35	19878.8	2.86961	3.56821e-16	3274.55	15441.9	4.71574
214214_s_at	complement component 1, q subcomponent binding protein	C1QBP	708																	0.00335879	1511.22	582.925	-2.59249
208910_s_at	complement component 1, q subcomponent binding protein	C1QBP	708													0.00284568	914.8	404.275	-2.26282
218983_at	complement component 1, r subcomponent-like	C1RL	51279													0.000733175	2359.6	1029.88	-2.29115
224693_at	chromosome 20 open reading frame 108	C20orf108	116151													1.4349e-07	1827.3	804.767	-2.2706	1.63461e-08	2663.85	1071.97	-2.48499
218448_at	chromosome 20 open reading frame 11	C20orf11	54994																	8.36007e-10	2103.95	5889.75	2.79938
225376_at	chromosome 20 open reading frame 11	C20orf11	54994									1.55653e-06	2681.78	1238.35	-2.1656
221954_at	Chromosome 20 open reading frame 111	C20orf111	51526																	2.53697e-10	2808.85	6556.35	2.33418
209020_at	chromosome 20 open reading frame 111	C20orf111	51526													4.5997e-08	12619.7	32483	2.57399	1.87156e-16	4065.73	28251.1	6.9486
226670_s_at	chromosome 20 open reading frame 119	C20orf119	80336													0.0150795	1924.3	956.775	-2.01124	0.000134567	#DIV/0!	1213.85	#DIV/0!
228031_at	chromosome 20 open reading frame 121	C20orf121	79183													0.00114771	1147	3149.68	2.74601	0.0228881	#DIV/0!	2147.88	#DIV/0!
1554041_at	chromosome 20 open reading frame 141	C20orf141	128653													0.0103457	623.567	#DIV/0!	#DIV/0!
233571_x_at	chromosome 20 open reading frame 149	C20orf149	79144																	0.00264199	#DIV/0!	1657.97	#DIV/0!
218010_x_at	chromosome 20 open reading frame 149	C20orf149	79144																	0.00347211	#DIV/0!	1095.37	#DIV/0!
1570070_at	chromosome 20 open reading frame 160	C20orf160	140706																	5.11441e-05	2056.77	721.325	-2.85137
231991_at	chromosome 20 open reading frame 160	C20orf160	140706									3.51273e-06	#DIV/0!	1048.47	#DIV/0!
225313_at	chromosome 20 open reading frame 177	C20orf177	63939	4.70208e-06	6502.85	2587.85	-2.51284	1.33188e-05	7335.25	3089.8	-2.37402	1.05374e-07	7042.2	2239.05	-3.14517	0.000292471	4381.43	1973.6	-2.22002
228291_s_at	chromosome 20 open reading frame 19	C20orf19	55857					4.77369e-06	1975.7	914.95	-2.15935	1.20297e-05	5963.5	2892.15	-2.06196
200856_x_at	nuclear receptor co-repressor 1 /// chromosome 20 open reading frame 191	C20orf191 /// NCOR1	100133918 /// 149934 /// 9611																	1.55632e-08	2922	1346.47	-2.17011
225825_at	chromosome 20 open reading frame 194	C20orf194	25943																	2.40606e-07	1715.93	629.1	-2.7276
1553311_at	chromosome 20 open reading frame 197	C20orf197	284756									5.86503e-07	500.15	#DIV/0!	#DIV/0!
226227_x_at	transaldolase 1 /// chromosome 20 open reading frame 199	C20orf199 /// TALDO1	441951													1.11884e-05	34424	93769	2.72394	7.53919e-14	14254.4	127935	8.97508
224915_x_at	transaldolase 1 /// chromosome 20 open reading frame 199	C20orf199 /// TALDO1	441951													4.6843e-06	30851.7	89787.4	2.91029	1.6896e-14	11856.4	119576	10.0854
226835_s_at	transaldolase 1 /// chromosome 20 open reading frame 199	C20orf199 /// TALDO1	441951													5.76117e-06	24782.5	78054	3.14956	6.85635e-14	9686.1	98547	10.1741
218586_at	chromosome 20 open reading frame 20	C20orf20	55257					2.09415e-06	763.1	1992.78	2.61142	1.4379e-06	1084.75	2995.03	2.76103	1.56922e-08	1022.85	3601.7	3.52124	4.85869e-08	1153.5	3559.45	3.08578
1553204_at	chromosome 20 open reading frame 200	C20orf200	253868																	4.34718e-05	2487.9	900.1	-2.76403
1553205_at	Chromosome 20 open reading frame 200	C20orf200	253868																	8.31433e-07	2095.38	879	-2.38382
50314_i_at	chromosome 20 open reading frame 27	C20orf27	54976																	0.000919126	1287.27	468.233	-2.7492
206656_s_at	chromosome 20 open reading frame 3	C20orf3	57136																	4.61804e-05	7742.33	3643.12	-2.12519
233842_x_at	chromosome 20 open reading frame 43	C20orf43	51507																	9.14308e-13	5551.05	11833.4	2.13174
234926_s_at	chromosome 20 open reading frame 43	C20orf43	51507																	1.61244e-11	6116.95	14750.8	2.41147
224128_at	chromosome 20 open reading frame 43	C20orf43	51507													0.00488113	#DIV/0!	680.6	#DIV/0!	2.38693e-05	#DIV/0!	572.9	#DIV/0!
233451_at	chromosome 20 open reading frame 54	C20orf54	113278																	0.000690772	1365.63	641.3	-2.12948
222045_s_at	chromosome 20 open reading frame 67	C20orf67	63935																	1.36993e-05	#DIV/0!	1399.83	#DIV/0!
221762_s_at	chromosome 20 open reading frame 67	C20orf67	63935																	8.19839e-05	#DIV/0!	1553.58	#DIV/0!
89948_at	chromosome 20 open reading frame 67	C20orf67	63935																	0.000602281	#DIV/0!	1708.25	#DIV/0!
222044_at	chromosome 20 open reading frame 67	C20orf67	63935													8.9104e-09	1702.2	4047.07	2.37756
225890_at	chromosome 20 open reading frame 72	C20orf72	92667					7.59429e-06	5163.1	2220.05	-2.32567
243689_s_at	Chromosome 20 open reading frame 80	C20orf80	284802													2.97669e-05	3066.28	953.05	-3.21733	2.89117e-06	9634.5	2475.12	-3.89253
234949_at	Chromosome 20 open reading frame 80	C20orf80	284802													2.0488e-05	11976.2	3161.75	-3.78783	5.24834e-05	19989.1	7041.1	-2.83892
228247_at	Chromosome 20 open reading frame 80 /// CDNA FLJ45377 fis, clone BRHIP3019956	C20orf80	284802																	0.00161234	2051.6	832.775	-2.46357
235535_x_at	FSHD region gene 1 /// chromosome 20 open reading frame 80 /// similar to FRG1 protein (FSHD region gene 1 protein)	C20orf80 /// FRG1 /// LOC642236 /// LOC730510	100134091 /// 2483 /// 284802 /// 642236																	0.00047366	4532.73	2093.8	-2.16483
1566927_at	chromosome 21 open reading frame 104	C21orf104	54748																	0.000160023	1693.23	778.433	-2.17518
1555373_at	chromosome 21 open reading frame 114	C21orf114	---													5.63339e-07	1355.73	559.725	-2.42213
232196_at	chromosome 21 open reading frame 13	C21orf13	150082													0.00233387	1134.35	487.15	-2.32854	0.00137723	1748.9	868.367	-2.01401
1562034_at	chromosome 21 open reading frame 134	C21orf134	727699																	0.00128342	1344.27	636.2	-2.11296
231491_at	chromosome 21 open reading frame 23	C21orf23	54088																	0.0128971	878	292.7	-2.99966
1559412_at	chromosome 21 open reading frame 34	C21orf34	388815													0.000355525	566.7	142.6	-3.97405	0.00254458	1239.3	508.5	-2.43717
240801_at	chromosome 21 open reading frame 37	C21orf37	54076													0.000317448	543.05	143	-3.79755	5.36331e-05	953.925	#DIV/0!	#DIV/0!
231303_at	chromosome 21 open reading frame 42	C21orf42	54072																	0.000212272	1105.92	356.6	-3.1013
219004_s_at	chromosome 21 open reading frame 45	C21orf45	54069																	0.00832604	1095	469.1	-2.33426
227421_at	chromosome 21 open reading frame 57	C21orf57	54059													0.00161923	1398.43	424.867	-3.29144
239208_s_at	Chromosome 21 open reading frame 57	C21orf57	54059													8.46744e-07	2045.72	624.175	-3.27749
242565_x_at	Chromosome 21 open reading frame 57	C21orf57	54059													0.000213568	1836.45	838.433	-2.19034
218123_at	chromosome 21 open reading frame 59	C21orf59	56683																	0.00123071	1986.53	915.05	-2.17096
226995_at	Chromosome 21 open reading frame 86	C21orf86	257103													0.000513478	691.1	#DIV/0!	#DIV/0!
1552895_a_at	chromosome 21 open reading frame 99	C21orf99	149992																	0.00951943	1350.25	509.325	-2.65106
223039_at	chromosome 22 open reading frame 13	C22orf13	83606																	9.07492e-11	4042.52	10126.8	2.50506
200042_at	chromosome 22 open reading frame 28	C22orf28	51493													0.00288384	1765.65	#DIV/0!	#DIV/0!	0.000103684	2699.55	#DIV/0!	#DIV/0!
226204_at	chromosome 22 open reading frame 29	C22orf29	79680									5.43049e-09	1071.12	403.2	-2.65656	1.18166e-07	1343.83	534.05	-2.51631	0.000242503	#DIV/0!	926.967	#DIV/0!
1556072_at	chromosome 22 open reading frame 37	C22orf37	200298													9.06746e-08	2228.02	6202.65	2.78392
212421_at	chromosome 22 open reading frame 9	C22orf9	23313									1.74521e-05	1140.55	516.475	-2.20834	2.16052e-07	2381.47	891.2	-2.67221	1.05727e-06	2563.22	1026.75	-2.49645
217118_s_at	chromosome 22 open reading frame 9	C22orf9	23313					1.22323e-08	1787.25	625.65	-2.85663	2.72223e-09	2939.8	932.6	-3.15226	7.11157e-06	3488.38	1611.32	-2.16491	3.1685e-07	3157.25	1312.25	-2.40598
1555100_at	chromosome 2 open reading frame 13	C2orf13	200558													0.00231444	624.825	242.533	-2.57624	0.0223878	1188.17	520.167	-2.2842
1554444_s_at	chromosome 2 open reading frame 18	C2orf18	54978																	1.95835e-05	2441.68	1108.07	-2.20355
225695_at	chromosome 2 open reading frame 18	C2orf18	54978																	0.000504874	#DIV/0!	1878.5	#DIV/0!
200070_at	chromosome 2 open reading frame 24	C2orf24	27013													2.79892e-10	3581.6	9860.85	2.7532	5.51518e-08	3581.08	7306.38	2.04027
207511_s_at	chromosome 2 open reading frame 24	C2orf24	27013													1.94625e-09	#DIV/0!	3312.98	#DIV/0!	1.56461e-14	#DIV/0!	2285.3	#DIV/0!
222832_s_at	chromosome 2 open reading frame 33	C2orf33	56947																	1.82096e-11	3187.43	6766.3	2.12281
223091_x_at	chromosome 2 open reading frame 33	C2orf33	56947																	0.00295562	#DIV/0!	1429.6	#DIV/0!
231921_at	chromosome 2 open reading frame 37	C2orf37	80067																	0.019801	864.2	297.6	-2.9039
219662_at	chromosome 2 open reading frame 49	C2orf49	79074																	4.66021e-05	#DIV/0!	1497.45	#DIV/0!
228067_at	chromosome 2 open reading frame 55	C2orf55	343990													0.000799834	1468.43	343.9	-4.26994
224575_at	chromosome 3 open reading frame 10	C3orf10	55845													5.23367e-09	7222.07	16527.8	2.28851	3.0112e-12	4955.18	14542.2	2.93476
219288_at	chromosome 3 open reading frame 14	C3orf14	57415																	0.00557131	2095.85	497.5	-4.21276
1554528_at	chromosome 3 open reading frame 15	C3orf15	89876																	0.00673378	2971.67	830.25	-3.57924
225281_at	chromosome 3 open reading frame 17	C3orf17	25871													9.76245e-08	3338	8793.75	2.63444
1558094_s_at	chromosome 3 open reading frame 19	C3orf19	51244																	4.11167e-05	#DIV/0!	2092.5	#DIV/0!
220942_x_at	chromosome 3 open reading frame 28	C3orf28	26355	7.24459e-08	1026.12	3231.88	3.14959	4.75554e-17	1274.82	19733.2	15.4791	1.43162e-17	1639.35	30899.4	18.8486	7.03476e-17	2428.5	39669	16.3348	6.81329e-17	3990.9	52471.4	13.1478
223193_x_at	chromosome 3 open reading frame 28	C3orf28	26355	2.55468e-09	928.45	2995.88	3.22675	4.91349e-19	1087.23	18004	16.5596	1.42925e-19	1467.9	27498.8	18.7334	1.13593e-18	2096.72	36290.9	17.3084	8.55473e-19	3325.12	46860.8	14.093
224345_x_at	chromosome 3 open reading frame 28	C3orf28	26355	7.69338e-09	942.675	3271.85	3.47081	1.23187e-17	1159.2	17748	15.3106	9.8641e-19	1403.22	26888.6	19.162	9.34324e-18	2039.58	34857.3	17.0905	2.48361e-18	2871.73	45575.1	15.8703
1553158_at	chromosome 3 open reading frame 34	C3orf34	84984																	0.00689767	#DIV/0!	1322.5	#DIV/0!
238969_at	chromosome 3 open reading frame 55	C3orf55	152078																	0.000897702	957.25	#DIV/0!	#DIV/0!
226464_at	chromosome 3 open reading frame 58	C3orf58	205428													1.48862e-09	3234.95	9943.95	3.07391	2.72189e-10	3641.72	10367.3	2.84682
209284_s_at	chromosome 3 open reading frame 63	C3orf63	23272													1.25512e-07	2844.12	1297.7	-2.19167	2.13238e-07	4585.25	1372.45	-3.34092
209285_s_at	chromosome 3 open reading frame 63	C3orf63	23272					0.000116887	968.2	435.325	-2.22409	3.07668e-07	1964.33	580.6	-3.38327	5.17813e-11	2638.82	441.45	-5.97763	3.28708e-07	2415.97	735.125	-3.28648
1563207_at	Chromosome 3 open reading frame 65	C3orf65	646600																	0.00240938	538.933	#DIV/0!	#DIV/0!
238081_at	chromosome 4 open reading frame 12	C4orf12	404201																	0.000855452	622.733	#DIV/0!	#DIV/0!
223157_at	chromosome 4 open reading frame 14	C4orf14	84273													2.71655e-07	2361.58	#DIV/0!	#DIV/0!
210054_at	chromosome 4 open reading frame 15	C4orf15	79441					4.59544e-08	1916.78	732.125	-2.6181	3.40445e-07	2740.23	1221.1	-2.24406
223204_at	chromosome 4 open reading frame 18	C4orf18	51313																	0.00636341	1342.42	299.533	-4.48172
218449_at	chromosome 4 open reading frame 20	C4orf20	55325	1.61086e-05	966.8	2190.53	2.26575	5.75526e-13	754.375	4750.43	6.29717	4.34356e-15	752.125	7039.18	9.35905	1.07322e-12	1222.12	8047.7	6.58501	5.33181e-11	1955.6	9076.57	4.64132
230319_at	Chromosome 4 open reading frame 31	C4orf31	---																	4.12965e-05	719.05	#DIV/0!	#DIV/0!
227856_at	chromosome 4 open reading frame 32	C4orf32	132720													4.72408e-07	1092.9	291.575	-3.74826
222336_at	chromosome 4 open reading frame 34	C4orf34	201895																	0.000482032	1339.28	663.4	-2.0188
224990_at	chromosome 4 open reading frame 34	C4orf34	201895																	1.743e-07	1919.3	5883.88	3.06564
1555096_at	chromosome 4 open reading frame 37	C4orf37	285555													0.000333586	1034.97	#DIV/0!	#DIV/0!	0.000113572	2448.12	739.25	-3.31163
1553711_a_at	chromosome 4 open reading frame 39	C4orf39	152756													0.000841425	742.075	257.5	-2.88184	0.0141891	1450	477.867	-3.03432
203600_s_at	chromosome 4 open reading frame 8	C4orf8	8603																	4.4716e-09	2340.47	5074.27	2.16806
220088_at	complement component 5a receptor 1	C5AR1	728																	9.00616e-09	15373.5	43286.3	2.81564
201310_s_at	chromosome 5 open reading frame 13	C5orf13	9315																	0.00083529	1708.2	733.025	-2.33034
229260_at	Chromosome 5 open reading frame 15	C5orf15	56951																	0.000105616	1248.17	396.8	-3.14558
203024_s_at	chromosome 5 open reading frame 15	C5orf15	56951													4.09833e-07	4499.05	10282.7	2.28553	1.92376e-11	3532.07	11652.9	3.29917
223882_at	chromosome 5 open reading frame 21	C5orf21	83989																	1.3043e-07	5587.25	1629.4	-3.42902
212936_at	chromosome 5 open reading frame 21	C5orf21	83989									3.07364e-06	1641.78	806.525	-2.03562	1.91863e-09	2215.3	811.85	-2.72871	1.25249e-10	4250.67	1431.35	-2.9697
203738_at	chromosome 5 open reading frame 22	C5orf22	55322													5.27639e-07	1889.72	867.9	-2.17735	4.48433e-08	2284.5	912.65	-2.50315
1552660_a_at	chromosome 5 open reading frame 22	C5orf22	55322													4.65744e-05	676.5	309.7	-2.18437	9.42425e-06	929.35	382.9	-2.42714
224875_at	chromosome 5 open reading frame 24	C5orf24	134553									0.00117923	901.2	389.425	-2.31418
228805_at	chromosome 5 open reading frame 25	C5orf25	375484																	3.66969e-09	1108.97	357.233	-3.10434
219029_at	chromosome 5 open reading frame 28	C5orf28	64417																	0.000293778	837.333	#DIV/0!	#DIV/0!
1552386_at	chromosome 5 open reading frame 29	C5orf29	202309													4.18982e-05	26589.1	10275.3	-2.58767	1.10012e-08	22961.7	5085.5	-4.51514
218588_s_at	chromosome 5 open reading frame 3	C5orf3	10827																	3.68769e-06	2977.23	1090.98	-2.72896
221823_at	chromosome 5 open reading frame 30	C5orf30	90355													3.43287e-05	1063.73	333.3	-3.19149	1.4097e-07	2212.82	735.8	-3.00737
224707_at	chromosome 5 open reading frame 32	C5orf32	84418													5.07004e-17	10151.2	53315.4	5.2521	8.67118e-21	5664.05	44279.1	7.81756
226946_at	chromosome 5 open reading frame 33	C5orf33	133686																	9.30225e-05	1619.15	696.525	-2.32461
227267_at	chromosome 5 open reading frame 37	C5orf37	134359													6.50766e-07	1744.15	831.05	-2.09873	2.26159e-08	2373.85	988.6	-2.40122
226306_at	chromosome 6 open reading frame 1	C6orf1	221491													9.8441e-08	2153.25	6459.12	2.99971	3.80772e-10	#DIV/0!	4688.9	#DIV/0!
220614_s_at	chromosome 6 open reading frame 103	C6orf103	79747																	0.018674	941.067	238	-3.95406
217924_at	chromosome 6 open reading frame 106	C6orf106	64771																	7.89234e-11	#DIV/0!	4740	#DIV/0!
217925_s_at	chromosome 6 open reading frame 106	C6orf106	64771																	8.42047e-10	#DIV/0!	4240.55	#DIV/0!
205457_at	chromosome 6 open reading frame 106	C6orf106	64771																	9.93794e-06	#DIV/0!	2674.17	#DIV/0!
226135_at	chromosome 6 open reading frame 107	C6orf107	54887																	0.0176691	1863.85	852.975	-2.18512
232777_s_at	chromosome 6 open reading frame 118	C6orf118	168090																	3.57736e-05	869.933	#DIV/0!	#DIV/0!
234097_s_at	chromosome 6 open reading frame 12	C6orf12	80862																	0.0199143	760.25	250.6	-3.03372
234457_at	chromosome 6 open reading frame 12	C6orf12	80862																	0.00228659	759.4	#DIV/0!	#DIV/0!
221787_at	chromosome 6 open reading frame 120	C6orf120	387263									3.63478e-06	2436.95	1056.03	-2.30766	3.62717e-05	2319.25	952.3	-2.43542
238860_at	chromosome 6 open reading frame 130	C6orf130	221443													1.1724e-05	1560.55	690.4	-2.26036
237619_at	chromosome 6 open reading frame 146	C6orf146	222826													0.0065566	524.6	234.433	-2.23774
1553274_a_at	chromosome 6 open reading frame 151	C6orf151	154007					2.26586e-08	3531.8	1494.25	-2.36359
220324_at	chromosome 6 open reading frame 155	C6orf155	79940																	0.00226342	9472.12	1643.03	-5.76505
213312_at	chromosome 6 open reading frame 162	C6orf162	57150													0.000285697	#DIV/0!	3643.3	#DIV/0!
223144_s_at	chromosome 6 open reading frame 166	C6orf166	55122																	5.14965e-18	2408.03	8826.92	3.66563
223145_s_at	chromosome 6 open reading frame 166	C6orf166	55122																	9.77866e-21	5060.3	26914.8	5.31882
223143_s_at	chromosome 6 open reading frame 166	C6orf166	55122																	3.26975e-12	1166.07	7010.07	6.01173
233050_at	chromosome 6 open reading frame 174	C6orf174	387104 /// 9729																	0.000684958	1476.03	#DIV/0!	#DIV/0!
1554019_s_at	chromosome 6 open reading frame 182	C6orf182	221017 /// 285753													0.000912239	681.4	267.933	-2.54317	0.0063201	1533.53	442.167	-3.46822
228875_at	chromosome 6 open reading frame 189	C6orf189	221303																	0.00439729	2415.22	561	-4.30521
226301_at	chromosome 6 open reading frame 192	C6orf192	116843													0.000113244	551.375	#DIV/0!	#DIV/0!	0.00145144	1113.18	517.5	-2.15106
223576_at	chromosome 6 open reading frame 203	C6orf203	51250													0.00266765	793.65	341	-2.32742
228007_at	chromosome 6 open reading frame 204	C6orf204	387119									0.000400058	2983.68	1426.1	-2.09219					0.000611901	2855.22	1425.5	-2.00296
218195_at	chromosome 6 open reading frame 211	C6orf211	79624																	1.83422e-06	2251.07	4862.92	2.16027
209829_at	chromosome 6 open reading frame 32	C6orf32	9750													5.80118e-06	5462.43	2201.85	-2.48083	2.84976e-08	4873.82	1536.22	-3.1726
220755_s_at	chromosome 6 open reading frame 48	C6orf48	50854																	0.000492066	6003.57	2797.52	-2.14603
218233_s_at	chromosome 6 open reading frame 49	C6orf49	100188893 /// 29964													0.000193125	5286.55	1949.65	-2.71154
223516_s_at	chromosome 6 open reading frame 49	C6orf49	100188893 /// 29964													0.0010293	2000.88	855.15	-2.33979
238385_at	Chromosome 6 open reading frame 58	C6orf58	352999																	1.4813e-05	820.433	297.9	-2.75406
220150_s_at	chromosome 6 open reading frame 60	C6orf60	79632													0.000107362	1400.27	344.267	-4.06739	0.000198864	2348.18	1076.55	-2.1812
213872_at	Chromosome 6 open reading frame 62	C6orf62	---																	1.43791e-09	21020.7	50518.6	2.40328
222309_at	Chromosome 6 open reading frame 62	C6orf62	81688													3.05828e-05	1205.28	2649.12	2.19794	1.08876e-12	595.033	2629.4	4.41891
222741_s_at	chromosome 6 open reading frame 64	C6orf64	55776													4.9005e-08	1207.67	506.925	-2.38235	4.82182e-08	1688.15	690.975	-2.44314
219006_at	chromosome 6 open reading frame 66	C6orf66	29078																	0.00907819	2087.7	908.75	-2.29733
225576_at	chromosome 6 open reading frame 72	C6orf72	116254													1.26879e-08	5401.5	11393.4	2.1093	2.61187e-15	2186.13	8515.2	3.8951
233206_at	chromosome 6 open reading frame 85	C6orf85	63027													0.0133036	328.5	724.7	2.20609
242055_at	Chromosome 6 open reading frame 86	C6orf86	---																	0.00250129	950.9	305.75	-3.11006
228217_s_at	chromosome 6 open reading frame 86	C6orf86	389362									0.000126096	1065.03	371.8	-2.86451	0.000501758	1152.3	419.1	-2.74946
224987_at	chromosome 6 open reading frame 89	C6orf89	221477																	0.0109792	#DIV/0!	955.575	#DIV/0!
224977_at	chromosome 6 open reading frame 89	C6orf89	221477									1.95422e-06	5002.55	2455.9	-2.03695
224808_s_at	chromosome 7 open reading frame 20	C7orf20	51608																	3.81715e-05	#DIV/0!	2131.9	#DIV/0!
204215_at	chromosome 7 open reading frame 23	C7orf23	79161					1.34791e-08	3212.25	1172.5	-2.73966	5.74341e-07	3530.53	1512.67	-2.33396	4.3627e-09	3153.9	1022.9	-3.08329	9.54476e-09	2570.8	934.4	-2.75128
215380_s_at	chromosome 7 open reading frame 24	C7orf24	79017													4.69074e-05	1217.75	#DIV/0!	#DIV/0!	1.25299e-12	2322.28	#DIV/0!	#DIV/0!
53202_at	chromosome 7 open reading frame 25	C7orf25	79020					0.00163657	573.65	255.867	-2.24199	3.0058e-05	679.175	246.1	-2.75975	3.15114e-05	757.95	275.1	-2.75518
221573_at	chromosome 7 open reading frame 25	C7orf25	79020									0.000199842	1396.08	605.6	-2.30528
201974_s_at	chromosome 7 open reading frame 28A /// chromosome 7 open reading frame 28B /// similar to CG14980-PB	C7orf28A /// C7orf28B /// LOC652200	51622																	4.83076e-06	1709.3	638.125	-2.67863
244641_at	chromosome 7 open reading frame 30	C7orf30	115416																	0.0107915	1746.73	499	-3.50047
230516_at	Chromosome 7 open reading frame 30	C7orf30	115416																	0.00092214	1062.92	529.125	-2.00884
229146_at	chromosome 7 open reading frame 31	C7orf31	136895																	7.59063e-05	1404.42	672.8	-2.08743
226018_at	chromosome 7 open reading frame 41	C7orf41	222166					4.26026e-06	1215.2	388.275	-3.12974	0.000103842	1639.17	549.975	-2.98045
220659_s_at	chromosome 7 open reading frame 43	C7orf43	55262					5.83477e-06	1842.5	734.55	-2.50834	2.50727e-07	2764.4	915.15	-3.02071	3.70461e-06	2074.27	685.55	-3.0257
232330_at	Chromosome 7 open reading frame 44	C7orf44	---									4.67313e-06	2729.72	1137.95	-2.39881	0.000350854	2141	943.3	-2.26969	5.76319e-06	1858.85	746.3	-2.49075
209446_s_at	chromosome 7 open reading frame 44	C7orf44	55744	1.73036e-14	647.275	7819.62	12.0808	7.85711e-19	387.3	11788.6	30.438	2.92345e-19	364.675	13590.6	37.2678	2.39005e-18	664.867	16850.6	25.3443	8.99856e-17	1224.25	17634.7	14.4045
209445_x_at	chromosome 7 open reading frame 44	C7orf44	55744					6.91132e-06	6363.85	2388.72	-2.66412	0.000168512	7631.35	3456.27	-2.20797
239490_at	chromosome 7 open reading frame 44	C7orf44	55744					0.000851972	1410.15	#DIV/0!	#DIV/0!
226434_at	chromosome 7 open reading frame 47	C7orf47	221908																	1.06582e-08	2596.7	5707.62	2.19803
221629_x_at	chromosome 8 open reading frame 30A	C8orf30A	51236																	3.48591e-06	3250.87	1170.3	-2.77781
219071_x_at	chromosome 8 open reading frame 30A	C8orf30A	51236																	2.82055e-05	4269.12	1643.32	-2.59786
218187_s_at	chromosome 8 open reading frame 33	C8orf33	65265													9.17694e-06	973.325	468.767	-2.07635	2.29576e-05	1661.43	828.267	-2.00592
235509_at	chromosome 8 open reading frame 38	C8orf38	137682													1.62073e-05	787.15	279.8	-2.81326	9.55163e-06	1210.58	426.2	-2.84039
219124_at	chromosome 8 open reading frame 41	C8orf41	80185																	0.0167799	#DIV/0!	1030.08	#DIV/0!
1555243_x_at	chromosome 8 open reading frame 59	C8orf59	401466																	0.000164925	2027.42	919.95	-2.20384
220712_at	chromosome 8 open reading frame 60	C8orf60	619426									7.12324e-09	4459.7	10588.4	2.37425	1.44145e-08	3695.48	8480.48	2.29483
1558790_s_at	chromosome 8 open reading frame 77	C8orf77	286103													0.000142225	636.9	136.25	-4.6745
218565_at	chromosome 9 open reading frame 114	C9orf114	51490													0.000137998	588.3	#DIV/0!	#DIV/0!
226027_at	chromosome 9 open reading frame 119	C9orf119	375757																	0.0152699	#DIV/0!	758.325	#DIV/0!
224860_at	chromosome 9 open reading frame 123	C9orf123	90871													6.09746e-06	1178.83	322.9	-3.65077	0.00196634	1431.45	537.4	-2.66366
213386_at	chromosome 9 open reading frame 125	C9orf125	84302																	6.24301e-06	1425	400.85	-3.55495
243610_at	chromosome 9 open reading frame 135	C9orf135	138255																	0.000506548	1862.35	655.6	-2.84068
1559293_x_at	Chromosome 9 open reading frame 14	C9orf14	158035																	0.0068231	1586.47	379.6	-4.17931
233589_x_at	chromosome 9 open reading frame 167	C9orf167	54863													0.00777235	824.05	378.05	-2.17974
227534_at	chromosome 9 open reading frame 21	C9orf21	195827					0.000407949	887	1827.38	2.06017	0.000488962	497.3	1815.65	3.65102	0.000443597	#DIV/0!	2638.95	#DIV/0!
223368_s_at	chromosome 9 open reading frame 32	C9orf32	28989									1.55028e-05	982.775	1993.22	2.02816	1.24145e-06	663.4	1519.2	2.29002	3.14466e-07	#DIV/0!	1902.97	#DIV/0!
223369_at	chromosome 9 open reading frame 32	C9orf32	28989																	0.000625886	#DIV/0!	1625.9	#DIV/0!
241696_at	Chromosome 9 open reading frame 39	C9orf39	54875																	0.000215266	1165.05	464.8	-2.50656
228324_at	chromosome 9 open reading frame 41	C9orf41	138199																	0.00867538	1702.17	725.65	-2.34572
223006_s_at	chromosome 9 open reading frame 5	C9orf5	23731													1.78226e-08	2149.07	563.8	-3.81177	0.000314105	2492.35	1187.8	-2.09829
223005_s_at	chromosome 9 open reading frame 5	C9orf5	23731																	0.00324629	1237.78	595.9	-2.07715
223007_s_at	chromosome 9 open reading frame 5	C9orf5	23731													1.98051e-06	1760.73	614.9	-2.86345
223008_s_at	chromosome 9 open reading frame 5	C9orf5	23731									0.00010411	888.675	334.7	-2.65514
240316_at	chromosome 9 open reading frame 57	C9orf57	138240																	0.00390479	916.133	438.6	-2.08877
223075_s_at	chromosome 9 open reading frame 58	C9orf58	83543																	9.81972e-05	1171.83	498	-2.35308
213900_at	chromosome 9 open reading frame 61	C9orf61	9413																	0.00124458	1510.38	526.3	-2.8698
235940_at	chromosome 9 open reading frame 64	C9orf64	84267					1.06671e-05	906	355.725	-2.54691	4.54141e-09	1214.9	338.533	-3.58872	4.05406e-08	966.8	264.1	-3.66073
224962_at	chromosome 9 open reading frame 69	C9orf69	90120									0.000175089	1269.4	541.2	-2.34553
225919_s_at	chromosome 9 open reading frame 72	C9orf72	203228																	9.509e-12	4429.23	21988.4	4.9644
1553133_at	chromosome 9 open reading frame 72	C9orf72	203228									0.00237579	13456.3	29324.4	2.17922	1.35826e-09	4844.85	29153.8	6.01748	8.95564e-10	2149.5	13708.9	6.37772
1553134_s_at	chromosome 9 open reading frame 72	C9orf72	203228													0.00227858	1864.77	5468.35	2.93244
219276_x_at	chromosome 9 open reading frame 82	C9orf82	79886													0.000421784	989.15	425.4	-2.32522
235866_at	chromosome 9 open reading frame 85	C9orf85	138241																	0.00302253	1444.03	526.933	-2.74043
223398_at	chromosome 9 open reading frame 89	C9orf89	84270									5.67449e-05	6182.95	12546.5	2.02922	1.15692e-06	3119.4	8628.8	2.76617
221865_at	chromosome 9 open reading frame 91	C9orf91	203197					0.00027854	774.575	1568.95	2.02556	5.3031e-08	960.1	3810.22	3.96857	6.99542e-08	1139.55	4118.07	3.61377	1.166e-05	1662.67	4326.3	2.60201
1558082_at	chromosome 9 open reading frame 93	C9orf93	203238																	0.0139627	966.625	409	-2.36339
1562761_at	chromosome 9 open reading frame 95	C9orf95	54981																	0.0114215	1070.7	424.125	-2.52449
1557666_s_at	chromosome 9 open reading frame 98	C9orf98	158067													2.75905e-05	1257.43	394.225	-3.18961
205949_at	carbonic anhydrase I	CA1	759													0.00955086	580.833	284.8	-2.03944	0.00256148	935.5	357.6	-2.61605
205950_s_at	carbonic anhydrase I	CA1	759													0.0118973	1120.9	364	-3.0794
206209_s_at	carbonic anhydrase IV	CA4	762					0.000621871	19707.3	7304.5	-2.69797	5.45214e-05	13225.5	3080.4	-4.29344	8.69707e-07	3398.15	504.3	-6.73835
206208_at	carbonic anhydrase IV	CA4	762					0.000626102	11023.6	4101.58	-2.68765	7.1854e-05	7121.38	1951.47	-3.64923	4.307e-06	1864.95	421.1	-4.42876
225914_s_at	calcium binding protein 39-like	CAB39L	81617																	3.54227e-06	1727.93	3495.57	2.02298
218168_s_at	chaperone, ABC1 activity of bc1 complex homolog (S. pombe)	CABC1	56997					1.25541e-06	8640.48	3356.2	-2.57448	5.40125e-05	13359.3	6375.52	-2.09541
202624_s_at	calcineurin binding protein 1	CABIN1	23523													1.08418e-06	3020.88	907.025	-3.33053	7.17659e-07	2444.15	999.6	-2.44513
37652_at	calcineurin binding protein 1	CABIN1	23523													6.22071e-05	3222.93	902.175	-3.57239
214933_at	calcium channel, voltage-dependent, P/Q type, alpha 1A subunit	CACNA1A	773													1.52016e-06	1030.05	354.9	-2.90237
1552863_a_at	calcium channel, voltage-dependent, gamma subunit 6	CACNG6	59285																	0.000350471	4121.75	1971.25	-2.09093
224137_at	calcium channel, voltage-dependent, gamma subunit 7	CACNG7	59284																	0.0010099	1065.22	402.9	-2.64389
209031_at	cell adhesion molecule 1	CADM1	23705													0.00659343	1204.33	#DIV/0!	#DIV/0!	0.003201	2870.87	1063.8	-2.69869
209032_s_at	cell adhesion molecule 1	CADM1	23705																	0.000758774	1632.72	748.2	-2.1822
1552754_a_at	cell adhesion molecule 2	CADM2	253559																	0.00571715	1847.4	466.233	-3.96239
1552752_a_at	cell adhesion molecule 2	CADM2	253559													0.000586807	629.725	272.725	-2.30901	4.00174e-06	1252.12	339	-3.69358
205626_s_at	calbindin 1, 28kDa	CALB1	793																	0.0162289	1025.12	390.4	-2.62583
205625_s_at	calbindin 1, 28kDa	CALB1	793																	0.00311018	980.8	#DIV/0!	#DIV/0!
209002_s_at	calcium binding and coiled-coil domain 1	CALCOCO1	57658																	0.000392618	#DIV/0!	5776.93	#DIV/0!
1560631_at	calcium binding and coiled-coil domain 2	CALCOCO2	10241																	0.00124632	1798.2	742.475	-2.4219
210817_s_at	calcium binding and coiled-coil domain 2	CALCOCO2	10241																	2.95647e-13	3976.72	11783.8	2.9632
206331_at	calcitonin receptor-like	CALCRL	10203																	0.000150279	1545.2	271.7	-5.68715
211985_s_at	calmodulin 1 (phosphorylase kinase, delta)	CALM1	801 /// 805 /// 808													7.31361e-05	3373.58	1549.2	-2.17762	1.07712e-06	3771.98	1423.85	-2.64914
211984_at	calmodulin 1 (phosphorylase kinase, delta)	CALM1	801 /// 805 /// 808									7.09716e-07	4236.18	1958.73	-2.16272	1.846e-06	2741.92	1258.1	-2.17942	3.41857e-07	3748.72	1570.3	-2.38727
241619_at	calmodulin 1 (phosphorylase kinase, delta)	CALM1	801 /// 805 /// 808													0.000337684	958.233	247.333	-3.87426
200622_x_at	calmodulin 3 (phosphorylase kinase, delta)	CALM3	801 /// 805 /// 808													4.97899e-08	4234.4	9327.33	2.20275	4.31796e-11	2902.55	6826.43	2.35187
200623_s_at	calmodulin 3 (phosphorylase kinase, delta)	CALM3	801 /// 805 /// 808																	2.38888e-05	#DIV/0!	1128.55	#DIV/0!
64408_s_at	calmodulin-like 4	CALML4	91860									0.00129123	812.5	366	-2.21995
221879_at	calmodulin-like 4	CALML4	91860					0.00047639	1357.23	#DIV/0!	#DIV/0!	3.1499e-05	1905.7	#DIV/0!	#DIV/0!
214315_x_at	calreticulin	CALR	811																	3.26803e-05	2605.22	6959.45	2.67134
212953_x_at	calreticulin	CALR	811																	6.88766e-05	#DIV/0!	6504.55	#DIV/0!
226959_at	calcium/calmodulin-dependent protein kinase ID	CAMK1D	283070									1.82956e-08	3756.32	1623.2	-2.31415	7.6157e-10	3790.55	1386.53	-2.73385	1.88626e-06	3734.95	1866.15	-2.00142
235626_at	calcium/calmodulin-dependent protein kinase ID	CAMK1D	57118									0.00101046	5119.48	2467.75	-2.07455	0.000236993	4376.45	1792.62	-2.44136
226382_at	calcium/calmodulin-dependent protein kinase ID /// hypothetical protein LOC283070	CAMK1D /// LOC283070	283070									2.0054e-11	5445.93	1792	-3.03902	7.63043e-12	4824.88	1446.55	-3.33544
217128_s_at	calcium/calmodulin-dependent protein kinase IG	CAMK1G	57172					0.000911318	470.6	1125.55	2.39173	0.00333645	#DIV/0!	842.7	#DIV/0!
215161_at	calcium/calmodulin-dependent protein kinase IG	CAMK1G	57172					3.66703e-05	#DIV/0!	1238.67	#DIV/0!	6.60882e-06	#DIV/0!	946.833	#DIV/0!
231042_s_at	Calcium/calmodulin-dependent protein kinase (CaM kinase) II delta	CAMK2D	817																	0.000768778	930.767	253.75	-3.66805
228555_at	Calcium/calmodulin-dependent protein kinase (CaM kinase) II delta	CAMK2D	817													3.51133e-05	660.4	216.8	-3.04613	0.000223887	1338	431.2	-3.10297
231793_s_at	calcium/calmodulin-dependent protein kinase (CaM kinase) II delta	CAMK2D	817																	0.00280536	1067.77	479.6	-2.22639
218309_at	calcium/calmodulin-dependent protein kinase II inhibitor 1	CAMK2N1	55450																	0.000290296	1157.77	504.2	-2.29624
210787_s_at	calcium/calmodulin-dependent protein kinase kinase 2, beta	CAMKK2	10645									0.000138003	1805.58	4096.7	2.26892	0.000596432	1923.6	4597.35	2.38997	0.000577395	1153.9	2721.92	2.35889
212252_at	calcium/calmodulin-dependent protein kinase kinase 2, beta	CAMKK2	10645					1.85043e-05	8493.2	18847.5	2.21913	1.57999e-05	6732.77	14659.9	2.1774	5.37678e-10	4604.15	18053.9	3.92123	5.75906e-09	3364.9	11149	3.31332
213812_s_at	calcium/calmodulin-dependent protein kinase kinase 2, beta	CAMKK2	10645													1.72505e-06	9760.57	28393.2	2.90897	1.10041e-06	5433.5	18229.1	3.35494
203538_at	calcium modulating ligand	CAMLG	819																	1.74184e-10	4258.9	9679.33	2.27273
210244_at	cathelicidin antimicrobial peptide	CAMP	820													1.92143e-06	5548.67	#DIV/0!	#DIV/0!	1.9727e-13	16284.8	#DIV/0!	#DIV/0!
212712_at	calmodulin regulated spectrin-associated protein 1	CAMSAP1	157922									0.00254521	679.825	295.65	-2.29942
212765_at	calmodulin regulated spectrin-associated protein 1-like 1	CAMSAP1L1	23271													0.000249491	1293.85	430.2	-3.00755	5.77635e-06	3220.2	771.575	-4.17354
217196_s_at	calmodulin regulated spectrin-associated protein 1-like 1	CAMSAP1L1	23271																	0.00936395	1206.63	393.9	-3.0633
1555370_a_at	calmodulin binding transcription activator 1	CAMTA1	23261													4.06253e-05	806.325	309.125	-2.60841	3.59922e-08	2958.88	611.05	-4.84228
239771_at	cullin-associated and neddylation-dissociated 1	CAND1	55832																	6.1153e-06	2071.93	707.875	-2.92696
208838_at	cullin-associated and neddylation-dissociated 1	CAND1	55832																	0.00166642	1182.33	574.925	-2.0565
46323_at	calcium activated nucleotidase 1	CANT1	124583																	1.28764e-11	2880.8	6629.93	2.30142
221732_at	calcium activated nucleotidase 1	CANT1	124583																	1.84595e-12	#DIV/0!	6240.73	#DIV/0!
1554327_a_at	calcium activated nucleotidase 1	CANT1	124583																	2.1257e-06	#DIV/0!	2703.78	#DIV/0!
200068_s_at	calnexin	CANX	821													6.73916e-06	12757	34127.9	2.67522	5.00189e-11	11318.9	55946.9	4.94277
238034_at	calnexin	CANX	821													9.21921e-05	4488.3	12577.2	2.80222	2.92484e-10	2863.25	20903.8	7.30074
208853_s_at	calnexin	CANX	821													2.11386e-06	5220.62	19901.1	3.81202	1.47924e-12	3146.3	29391.4	9.34157
208852_s_at	calnexin	CANX	821													4.57333e-06	4106.65	18909.2	4.60454	1.04626e-10	2388.05	26556.4	11.1205
212551_at	CAP, adenylate cyclase-associated protein, 2 (yeast)	CAP2	10486																	0.00330443	1143.42	487.65	-2.34477
234709_at	calpain 13	CAPN13	92291																	0.00792505	4890.3	1054.2	-4.63887
208683_at	calpain 2, (m/II) large subunit	CAPN2	824																	0.0103938	5508.75	1183.62	-4.65413
214888_at	calpain 2, (m/II) large subunit	CAPN2	824																	0.00110312	1397.1	600.067	-2.32824
210944_s_at	calpain 3, (p94)	CAPN3	825													0.000713568	1073.77	314.7	-3.41203
203357_s_at	calpain 7	CAPN7	23473													6.24956e-09	3060.3	6683.75	2.18402	6.83762e-13	2051.28	5981.7	2.91609
203356_at	calpain 7	CAPN7	23473													6.87728e-09	3388.18	10534.1	3.10908	2.94538e-11	1991.77	7175.48	3.60255
210641_at	calpain 9	CAPN9	10753																	0.0222871	1162.63	432.3	-2.68941
226990_at	cell cycle associated protein 1	CAPRIN1	4076																	9.53382e-08	2549.25	980.45	-2.60008
226285_at	cell cycle associated protein 1	CAPRIN1	4076																	0.000259198	1176.75	457.25	-2.57354
200722_s_at	cell cycle associated protein 1	CAPRIN1	4076																	1.64727e-07	2883.85	6401.02	2.21961
218456_at	caprin family member 2	CAPRIN2	65981									2.95699e-06	1069.4	411.375	-2.59957	1.09853e-07	1470.6	556.95	-2.64045	3.62898e-06	2390.82	1004	-2.3813
224370_s_at	calcyphosine 2	CAPS2	84698																	9.06403e-05	5556.33	974.2	-5.70347
201238_s_at	capping protein (actin filament) muscle Z-line, alpha 2	CAPZA2	830																	1.14247e-13	11884.5	34642.8	2.91496
224414_s_at	caspase recruitment domain family, member 6	CARD6	84674					0.000609216	1797.8	605.2	-2.97059
204950_at	caspase recruitment domain family, member 8	CARD8	22900													0.0002532	6013.5	2837.18	-2.11954
212971_at	cysteinyl-tRNA synthetase	CARS	833																	1.25729e-12	5304.02	11958.3	2.25457
240983_s_at	cysteinyl-tRNA synthetase	CARS	833																	7.09353e-07	#DIV/0!	1277.5	#DIV/0!
218153_at	cysteinyl-tRNA synthetase 2, mitochondrial (putative)	CARS2	79587									3.87824e-05	2899.57	1183.5	-2.45	6.34503e-07	3272.25	976.8	-3.34997	6.7029e-07	3829.47	1156.6	-3.31098
207842_s_at	cancer susceptibility candidate 3	CASC3	22794													6.69163e-11	15417.4	37354.2	2.42285	5.84136e-22	4775.55	31483.3	6.5926
228323_at	cancer susceptibility candidate 5	CASC5	57082																	0.00275505	926.75	328.55	-2.82073
219342_at	CAS1 domain containing 1	CASD1	64921																	7.24979e-07	3819.43	795.8	-4.79948
243500_at	CAS1 domain containing 1	CASD1	64921																	0.00602771	1193.88	568.1	-2.10152
226032_at	caspase 2, apoptosis-related cysteine peptidase (neural precursor cell expressed, developmentally down-regulated 2)	CASP2	835					1.14826e-10	3881.38	1443.58	-2.68872	3.78e-10	5511.35	2248.18	-2.45148	7.10459e-10	5040.55	1877.52	-2.68468
211464_x_at	caspase 6, apoptosis-related cysteine peptidase	CASP6	839																	0.00182983	1320.75	468.7	-2.8179
213373_s_at	caspase 8, apoptosis-related cysteine peptidase	CASP8	841													0.000263961	20013.8	9134.9	-2.19091
222201_s_at	CASP8 associated protein 2	CASP8AP2	9994					9.92504e-06	1499.22	642.675	-2.33279
210775_x_at	caspase 9, apoptosis-related cysteine peptidase	CASP9	842																	0.00378241	#DIV/0!	2727.45	#DIV/0!
207467_x_at	calpastatin	CAST	831									2.40695e-07	5547.55	12712.3	2.29151	8.33091e-16	4414.45	29852.5	6.76245	4.78177e-15	5087.52	27358.9	5.37764
208908_s_at	calpastatin	CAST	831									3.90238e-09	2041.28	8330.23	4.08089	9.26605e-15	2293.1	20714.5	9.03342	1.891e-15	2556.2	21215.1	8.29945
212586_at	calpastatin	CAST	831													0.00033072	2967.95	6200.77	2.08925
211922_s_at	catalase	CAT	847													1.71143e-06	15353.6	4882.35	-3.14472	2.29648e-09	17299.6	3759.12	-4.60202
201432_at	catalase	CAT	847													1.0223e-06	44958.3	17103.6	-2.62859	1.10891e-10	54210.2	12697.6	-4.26932
238363_at	Catalase	CAT	847					0.00144684	2003.72	976.325	-2.05231					6.48216e-05	3775.88	1302.92	-2.898	0.00119327	3916.53	1746.55	-2.24244
217588_at	cation channel, sperm associated 2 /// cation channel, sperm associated 2 pseudogene 1	CATSPER2 /// CATSPER2P1	117155 /// 440278																	0.00044441	1300.97	401.3	-3.24188
203323_at	caveolin 2	CAV2	858																	0.00873196	756.633	314.7	-2.4043
203324_s_at	caveolin 2	CAV2	858																	0.00502806	676.85	#DIV/0!	#DIV/0!
238549_at	core-binding factor, runt domain, alpha subunit 2; translocated to, 2	CBFA2T2	9139													6.51519e-06	2820.07	5903.65	2.09344	1.03967e-08	2405.62	6197.08	2.57608
209145_s_at	core-binding factor, runt domain, alpha subunit 2; translocated to, 2	CBFA2T2	9139																	0.00214217	#DIV/0!	555.933	#DIV/0!
225231_at	Cas-Br-M (murine) ecotropic retroviral transforming sequence	CBL	867																	4.19336e-05	6978.95	14386.5	2.06141
225234_at	Cas-Br-M (murine) ecotropic retroviral transforming sequence	CBL	867																	0.000324085	3169.2	7057.42	2.22688
209682_at	Cas-Br-M (murine) ecotropic retroviral transforming sequence b	CBLB	868					0.000627524	1016.95	499	-2.03798
220018_at	Cas-Br-M (murine) ecotropic retroviral transforming sequence-like 1	CBLL1	79872																	9.77055e-07	964.933	2596.93	2.6913
213626_at	carbonyl reductase 4	CBR4	84869					0.00020744	1026.97	488.15	-2.10381	7.11885e-06	1212.45	476.6	-2.54396	7.23033e-06	1247.2	464.45	-2.68533	1.09483e-05	1654.17	632.8	-2.61406
201518_at	chromobox homolog 1 (HP1 beta homolog Drosophila )	CBX1	10951					3.71823e-07	2984.1	967.8	-3.08338	5.34829e-06	5051.28	1965.3	-2.57023	7.82026e-05	4745.88	1999.55	-2.37347
201091_s_at	chromobox homolog 3 (HP1 gamma homolog, Drosophila) /// similar to chromobox homolog 3	CBX3 /// LOC653972	11335 /// 653972																	2.28892e-06	4051.23	8780.55	2.16738
227558_at	chromobox homolog 4 (Pc class homolog, Drosophila)	CBX4	8535																	4.84931e-12	10854.2	23103.9	2.12856
225323_at	coiled-coil and C2 domain containing 1B	CC2D1B	200014													0.000328652	1050.5	2535.62	2.41373	1.25504e-05	#DIV/0!	1599.33	#DIV/0!
227748_at	cysteine conjugate-beta lyase 2	CCBL2	56267													0.000155045	3113.38	1459.32	-2.13343
1554606_at	coiled-coil domain containing 100	CCDC100	153241									0.00130783	593.2	275.475	-2.15337	0.000105376	850.2	374.575	-2.26977	9.25342e-05	1207.75	474.9	-2.54317
226449_at	coiled-coil domain containing 100	CCDC100	153241					1.00626e-06	1218.3	535.225	-2.27624	3.55859e-06	1729.28	786.2	-2.19954	1.6885e-05	1951.12	942.433	-2.07031
48117_at	coiled-coil domain containing 101	CCDC101	112869									4.09965e-08	777.85	2377.55	3.05657	5.17277e-09	1317.2	4466.62	3.391	3.20468e-07	1288.95	3581.55	2.77866
221822_at	coiled-coil domain containing 101	CCDC101	112869									2.05969e-05	#DIV/0!	2217.32	#DIV/0!	3.82235e-07	#DIV/0!	4296.07	#DIV/0!	3.30876e-08	#DIV/0!	3513.8	#DIV/0!
224968_at	coiled-coil domain containing 104	CCDC104	112942									3.14075e-06	575.425	2504.15	4.35183	4.73137e-09	603.35	4072.73	6.75019	2.9789e-11	#DIV/0!	3426.88	#DIV/0!
229063_s_at	coiled-coil domain containing 107	CCDC107	203260									0.000105165	#DIV/0!	711.033	#DIV/0!	4.16534e-05	#DIV/0!	1188.6	#DIV/0!	0.0230764	#DIV/0!	998.975	#DIV/0!
227157_at	coiled-coil domain containing 111	CCDC111	201973									7.79338e-06	1054.73	501.075	-2.10492	3.44858e-13	1692.17	444.85	-3.80392	1.09836e-11	2195.57	636.475	-3.44959
235208_at	coiled-coil domain containing 112	CCDC112	153733													3.79334e-06	815.825	239.75	-3.40282	8.70027e-06	1217.32	458.9	-2.6527
226011_at	coiled-coil domain containing 12	CCDC12	151903													5.37433e-06	1619.58	643.65	-2.51624
1553894_at	coiled-coil domain containing 122	CCDC122	160857																	0.00539178	769.675	335.35	-2.29514
229082_at	coiled-coil domain containing 125	CCDC125	202243									3.90326e-05	1861.78	474.25	-3.92572
1553955_at	coiled-coil domain containing 128	CCDC128	129285																	8.63862e-09	2887.38	6048.12	2.09468
231653_at	coiled-coil domain containing 129	CCDC129	223075													0.00695387	552.65	#DIV/0!	#DIV/0!	0.0103435	1267.15	466.467	-2.71649
1553736_at	coiled-coil domain containing 131	CCDC131	196441																	3.83401e-06	1465.2	434.15	-3.37487
226031_at	coiled-coil domain containing 132	CCDC132	55610									0.00118928	704.95	235.75	-2.99024	1.27252e-06	1134.28	300.7	-3.77212	1.28104e-07	1885.7	#DIV/0!	#DIV/0!
232945_at	Coiled-coil domain containing 139	CCDC139	150962																	0.000419203	2512.97	659.025	-3.81317
225017_at	coiled-coil domain containing 14	CCDC14	64770													7.37374e-07	1208.3	333.575	-3.62227	3.43071e-06	2542.8	779.55	-3.26188
1561477_at	coiled-coil domain containing 144A	CCDC144A	9720																	0.000108112	1179.2	436.5	-2.70149
1561271_at	coiled-coil domain containing 144C	CCDC144C	348254																	0.0035423	2942.12	927.25	-3.17296
241360_at	coiled-coil domain containing 15	CCDC15	80071																	0.00587896	1344.6	420.55	-3.19724
232362_at	coiled-coil domain containing 18	CCDC18	343099																	3.7108e-05	1030.05	304.367	-3.38424
220308_at	coiled-coil domain containing 19	CCDC19	25790													0.000242659	#DIV/0!	848.4	#DIV/0!
226723_at	coiled-coil domain containing 23	CCDC23	374969																	6.47788e-05	#DIV/0!	2866.03	#DIV/0!
1553849_at	coiled-coil domain containing 26	CCDC26	137196																	0.00122608	2020.67	624.95	-3.23333
209479_at	coiled-coil domain containing 28A	CCDC28A	25901																	3.83826e-13	3649.8	12956.4	3.54989
1558648_at	coiled-coil domain containing 32	CCDC32	90416																	4.99592e-05	3086.57	1249.35	-2.47054
1563090_at	coiled-coil domain containing 33	CCDC33	80125																	4.88547e-06	2197.83	852.933	-2.57679
226287_at	coiled-coil domain containing 34	CCDC34	91057													3.91182e-05	668.025	294.433	-2.26885	1.11008e-08	1843.98	433.4	-4.25467
1553666_at	coiled-coil domain containing 34	CCDC34	91057																	0.0132909	2142.88	606.85	-3.53114
1569690_at	coiled-coil domain containing 36	CCDC36	339834																	5.12216e-05	1274.12	504.95	-2.52327
233326_at	coiled-coil domain containing 39	CCDC39	339829																	0.011617	646.067	#DIV/0!	#DIV/0!
219644_at	coiled-coil domain containing 41	CCDC41	51134																	1.11382e-05	1068.58	382.35	-2.79476
225705_at	coiled-coil domain containing 45	CCDC45	90799																	2.70949e-09	1190.55	2595.27	2.1799
1557886_at	coiled-coil domain containing 46	CCDC46	201134																	0.00517255	1244.07	#DIV/0!	#DIV/0!
222432_s_at	coiled-coil domain containing 47	CCDC47	57003													2.41854e-10	2620.8	8299.6	3.16682	7.39501e-11	3956.5	9469.17	2.39332
217814_at	coiled-coil domain containing 47	CCDC47	57003													1.39264e-07	3039.92	6773.95	2.22833	8.60959e-13	1819.73	6326.08	3.47639
218655_s_at	coiled-coil domain containing 49	CCDC49	54883																	6.41599e-12	2417.62	6584.17	2.72341
222706_at	coiled-coil domain containing 49	CCDC49	54883																	3.48254e-08	#DIV/0!	2265.38	#DIV/0!
225297_at	coiled-coil domain containing 5 (spindle associated)	CCDC5	115106					0.000343291	706.925	307.133	-2.30169	0.00432132	929.175	457.075	-2.03287					7.22169e-07	1837.4	566.2	-3.24514
225331_at	coiled-coil domain containing 50	CCDC50	152137																	0.000697205	1315.83	520.7	-2.52705
235051_at	coiled-coil domain containing 50	CCDC50	152137																	0.00208556	1127.13	#DIV/0!	#DIV/0!
234995_at	coiled-coil domain containing 52	CCDC52	152185																	0.000112325	1970.8	615.35	-3.20273
215094_at	coiled-coil domain containing 52	CCDC52	152185																	0.00905818	928.267	300.1	-3.09319
223236_at	coiled-coil domain containing 55	CCDC55	84081																	2.97537e-12	2791.25	7358.7	2.63635
222792_s_at	coiled-coil domain containing 59	CCDC59	29080																	2.78979e-06	2764.53	6291.9	2.27594
218936_s_at	coiled-coil domain containing 59	CCDC59	29080																	2.89114e-11	3589.05	9031.35	2.51636
204716_at	coiled-coil domain containing 6	CCDC6	8030																	0.00399186	1356.45	#DIV/0!	#DIV/0!
231567_s_at	coiled-coil domain containing 62	CCDC62	84660																	4.08075e-05	1725.12	698.6	-2.4694
212886_at	coiled-coil domain containing 69	CCDC69	26112									1.08387e-07	8662.58	3761.18	-2.30316
1553102_a_at	coiled-coil domain containing 69	CCDC69	26112									2.54802e-07	8083.15	3721.68	-2.17191
1554785_at	coiled-coil domain containing 82	CCDC82	79780																	7.75403e-08	2076.03	447.433	-4.63985
223300_s_at	coiled-coil domain containing 82	CCDC82	79780																	2.01406e-05	1838	3681.67	2.00309
1562648_at	Coiled-coil domain containing 88A	CCDC88A	55704																	1.87736e-06	2108.1	400.725	-5.26071
225045_at	coiled-coil domain containing 88A	CCDC88A	55704													0.00284173	1038.6	#DIV/0!	#DIV/0!	0.000492199	2822.82	554.733	-5.08862
219387_at	coiled-coil domain containing 88A	CCDC88A	55704													0.000681056	820.425	239.35	-3.42772	0.00127506	1934.53	706.875	-2.73674
239233_at	coiled-coil domain containing 88A	CCDC88A	55704																	0.0225657	789.375	297.3	-2.65515
223663_at	coiled-coil domain containing 88B	CCDC88B	283234																	0.000615481	#DIV/0!	4363	#DIV/0!
218545_at	coiled-coil domain containing 91	CCDC91	55297																	4.56576e-05	1964	578.15	-3.39704
1570571_at	Coiled-coil domain containing 91	CCDC91	55297																	0.00220283	843.5	375.133	-2.24853
219774_at	coiled-coil domain containing 93	CCDC93	54520									2.38449e-05	1239.57	3184.88	2.56933	2.7885e-07	1181.95	4222.32	3.57234	6.95804e-07	1473.17	4460.77	3.028
209689_at	coiled-coil domain containing 93	CCDC93	54520																	5.7326e-08	1336.4	4090.3	3.06069
209688_s_at	coiled-coil domain containing 93	CCDC93	54520													0.000530801	2377.2	5091.82	2.14194	5.9647e-10	1715.75	7189.9	4.19053
243282_at	Coiled-coil domain containing 93	CCDC93	54520													2.15686e-05	#DIV/0!	1971.5	#DIV/0!	3.02952e-09	#DIV/0!	2815.97	#DIV/0!
205476_at	chemokine (C-C motif) ligand 20	CCL20	6364					1.30581e-06	#DIV/0!	11577.4	#DIV/0!
224240_s_at	chemokine (C-C motif) ligand 28	CCL28	56477																	0.0065139	1552.78	734.825	-2.11312
205114_s_at	chemokine (C-C motif) ligand 3 /// chemokine (C-C motif) ligand 3-like 1 /// chemokine (C-C motif) ligand 3-like 3 /// similar to Small inducible cytokine A3-like 1 precursor (Tonsillar lymphocyte LD78 beta protein) (LD78-beta(1-70)) (G0/G1 switch regulatory protein 19-2) (G0S19-2 protein) (PAT 464.2) /// similar to chemokine (C-C motif) ligand 3-like 3	CCL3 /// CCL3L1 /// CCL3L3 /// LOC728830 /// LOC730422	414062 /// 6348 /// 6349 /// 728830									0.00089253	6616.05	28841.5	4.35932	0.00114921	6647.75	34019.9	5.11751	0.000116896	5809.4	23037.5	3.96556
204103_at	chemokine (C-C motif) ligand 4	CCL4	6351					0.00143309	15910.2	46602.9	2.92912	0.00136379	9263.25	30063.4	3.24545
1405_i_at	chemokine (C-C motif) ligand 5	CCL5	6352																	0.00234094	16491.7	3268.27	-5.046
1555759_a_at	chemokine (C-C motif) ligand 5	CCL5	6352																	0.000731451	10807.5	2295.93	-4.70726
223164_at	cerebral cavernous malformation 2	CCM2	83605					5.03244e-07	7277.38	3264.95	-2.22894	2.45111e-06	8239.42	4009.8	-2.05482	1.58242e-05	7157.9	3264.53	-2.19263
213226_at	cyclin A2	CCNA2	890																	0.0111028	1055.7	343.1	-3.07695
201955_at	cyclin C	CCNC	892																	0.000214487	3337.27	1461	-2.28424
201700_at	cyclin D3	CCND3	896									5.57637e-08	8223.45	3371.9	-2.43882	5.73016e-07	7486.9	3013.72	-2.48427	5.20185e-11	5806.9	1654.1	-3.51061
223084_s_at	cyclin D-type binding-protein 1	CCNDBP1	23582																	2.38753e-08	9806.62	19668.5	2.00563
205034_at	cyclin E2	CCNE2	9134																	4.18948e-08	1754.4	437.875	-4.00662
202770_s_at	cyclin G2	CCNG2	901																	7.45757e-11	15145.7	61755.4	4.07742
202769_at	cyclin G2	CCNG2	901																	1.806e-07	24187	106443	4.40082
211559_s_at	cyclin G2	CCNG2	901													2.55325e-05	23125.2	61329.1	2.65204	2.9294e-12	7506.68	42449.4	5.65488
208656_s_at	cyclin I	CCNI	10983																	4.68723e-12	31448.7	100630	3.19981
208655_at	Cyclin I	CCNI	10983																	6.15847e-12	25218.2	84452.6	3.34887
219470_x_at	cyclin J	CCNJ	54619																	7.83469e-05	835.275	272.3	-3.06748
229091_s_at	cyclin J	CCNJ	54619																	0.00110062	599.85	229.133	-2.61791
225824_at	cyclin K	CCNK	8812																	3.00883e-13	5658.57	15372.7	2.71671
241495_at	cyclin L1	CCNL1	57018																	0.000303019	2649.98	1292.3	-2.05059
220046_s_at	cyclin L1	CCNL1	57018													1.17817e-06	17402.8	37275.7	2.14194	9.02231e-13	10566.5	44430.6	4.20486
1555411_a_at	cyclin L1	CCNL1	57018													4.80592e-07	16047.3	37993.2	2.36758	6.83544e-15	7447.9	42534.8	5.71097
225555_x_at	Cyclin L2	CCNL2	54998													0.00789782	764.4	317.9	-2.40453
221427_s_at	cyclin L2 /// similar to Cyclin-L2 (Paneth cell-enhanced expression protein)	CCNL2 /// LOC727877	81669																	2.84739e-07	#DIV/0!	4965.73	#DIV/0!
214638_s_at	cyclin T2	CCNT2	905																	0.022984	#DIV/0!	1446.92	#DIV/0!
224651_at	cyclin Y	CCNY	219771					9.6255e-08	15156.5	7125.97	-2.12694	5.08854e-09	15488.7	6209.9	-2.49419					9.06621e-10	3126.88	8291.6	2.65172
224652_at	cyclin Y	CCNY	219771					0.000577557	7128.43	2745.4	-2.5965	3.17524e-05	8044.7	2294.6	-3.50593					4.70011e-05	#DIV/0!	2309.57	#DIV/0!
224647_at	cyclin Y	CCNY	219771					3.41941e-09	16973.3	7545.02	-2.2496	1.57657e-10	18278.2	7263.75	-2.51636	1.72119e-07	13238.9	6223.02	-2.12741
224649_x_at	cyclin Y	CCNY	219771					1.65343e-07	4038.97	1547.62	-2.60979	9.43197e-09	5236.8	1541.67	-3.39682
228810_at	cyclin Y-like 1	CCNYL1	151195													8.8143e-08	712.025	1876.65	2.63565
214152_at	cell cycle progression 1	CCPG1	9236					5.81785e-05	4066.7	2030.35	-2.00296	7.52614e-09	6067.3	1973.85	-3.07384	2.55146e-10	3962.8	1011.47	-3.91788	4.37103e-11	2732.7	711.033	-3.84328
222156_x_at	cell cycle progression 1	CCPG1	9236					3.61647e-06	4209.65	1758.1	-2.39443	6.13638e-09	7448.9	2126.38	-3.5031	6.00454e-09	4405.45	1425.5	-3.09046	5.58848e-09	2047	641.925	-3.18885
221511_x_at	cell cycle progression 1	CCPG1	9236					1.5469e-07	5729.27	2711.2	-2.11319	1.35795e-10	9171.98	3212.88	-2.85476	3.01517e-12	6248.32	1853.32	-3.37141	1.64063e-12	3365.65	1234.43	-2.72647
214151_s_at	cell cycle progression 1	CCPG1	9236									2.84873e-07	5202.3	2172.12	-2.39503	2.68888e-10	4582.62	1374.12	-3.33494
221156_x_at	cell cycle progression 1	CCPG1	9236									0.000864428	14326.4	6344.27	-2.25816
205099_s_at	chemokine (C-C motif) receptor 1	CCR1	1230																	0.000204375	9522.52	28533.4	2.99641
205098_at	chemokine (C-C motif) receptor 1	CCR1	1230																	1.54188e-07	11128.8	45350.2	4.07504
206978_at	chemokine (C-C motif) receptor 2 /// similar to C-C chemokine receptor type 2 (C-C CKR-2) (CC-CKR-2) (CCR-2) (CCR2) (Monocyte chemoattractant protein 1 receptor) (MCP-1-R) (CD192 antigen)	CCR2 /// LOC729230	1231 /// 729230													0.00853153	941.825	402.8	-2.3382	1.85106e-05	1478.57	354.6	-4.16967
208304_at	chemokine (C-C motif) receptor 3	CCR3	1232					0.000364505	23293.5	9088.73	-2.5629
206337_at	chemokine (C-C motif) receptor 7	CCR7	1236																	5.7723e-05	3411.32	1175.4	-2.90227
220351_at	chemokine (C-C motif) receptor-like 1	CCRL1	51554													0.00377591	794.7	305.65	-2.60003	0.0167463	1950.02	710.4	-2.74497
211434_s_at	chemokine (C-C motif) receptor-like 2 /// similar to chemokine (C-C motif) receptor-like 2	CCRL2 /// LOC727811	727811 /// 9034					0.000246779	8658.95	25847	2.98501	3.17364e-05	11423.5	38810.4	3.39741	6.20669e-07	10130.3	54545.5	5.38438	4.4766e-11	4945.75	60029.4	12.1376
203522_at	copper chaperone for superoxide dismutase	CCS	9973																	5.00616e-07	#DIV/0!	2314	#DIV/0!
201947_s_at	chaperonin containing TCP1, subunit 2 (beta)	CCT2	10576													0.000214319	2050.57	655.975	-3.126
201946_s_at	chaperonin containing TCP1, subunit 2 (beta)	CCT2	10576													0.000142814	726.933	325.7	-2.23191
200910_at	chaperonin containing TCP1, subunit 3 (gamma)	CCT3	7203									8.61439e-08	1131.65	475	-2.38242	3.64173e-08	1450.2	569.5	-2.54644
200877_at	chaperonin containing TCP1, subunit 4 (delta)	CCT4	10575													0.000223825	2852.68	1340.17	-2.1286
201327_s_at	chaperonin containing TCP1, subunit 6A (zeta 1)	CCT6A	908									6.39678e-07	1427.75	535.225	-2.66757	2.63098e-09	2237.95	546	-4.09881
227301_at	chaperonin containing TCP1, subunit 6A (zeta 1) pseudogene 1	CCT6AP1	643253 /// 649553																	7.60469e-07	1907.6	5281.57	2.7687
229900_at	CD109 molecule	CD109	135228																	0.00216436	1005.95	#DIV/0!	#DIV/0!
215049_x_at	CD163 molecule	CD163	9332																	0.00639241	#DIV/0!	4279.25	#DIV/0!
208653_s_at	CD164 molecule, sialomucin	CD164	8763																	6.34266e-10	4296.48	12419	2.89051
205831_at	CD2 molecule	CD2	914																	1.22458e-07	3625.45	799.1	-4.53692
1553395_a_at	CD200 receptor 1	CD200R1	131450																	9.88264e-06	2443.5	1107.32	-2.20667
204581_at	CD22 molecule /// myelin associated glycoprotein	CD22 /// MAG	933									6.85989e-05	#DIV/0!	702.533	#DIV/0!	9.47776e-05	#DIV/0!	2531.65	#DIV/0!	0.001114	#DIV/0!	2770.03	#DIV/0!
217422_s_at	CD22 molecule /// myelin associated glycoprotein	CD22 /// MAG	933													0.00926743	#DIV/0!	1922.9	#DIV/0!	0.000312741	#DIV/0!	2329.75	#DIV/0!
266_s_at	CD24 molecule	CD24	100133941																	2.12807e-05	8016.75	2963.85	-2.70484
216379_x_at	CD24 molecule	CD24	100133941																	1.09987e-05	19842.6	7443.17	-2.66588
208651_x_at	CD24 molecule	CD24	100133941																	3.20218e-05	5699.25	2186.25	-2.60686
209771_x_at	CD24 molecule	CD24	100133941																	3.72452e-05	22430	8722.88	-2.5714
209772_s_at	CD24 molecule	CD24	100133941																	0.000407194	3241.5	1354.57	-2.393
223834_at	CD274 molecule	CD274	29126																	0.00567703	1811.93	727.05	-2.49217
206545_at	CD28 molecule	CD28	940																	2.20666e-05	1465.25	408.65	-3.58559
203593_at	CD2-associated protein	CD2AP	23607																	0.000553331	4783.27	1530.3	-3.12571
202257_s_at	CD2 (cytoplasmic tail) binding protein 2	CD2BP2	10421																	1.54616e-14	#DIV/0!	3241.23	#DIV/0!
209933_s_at	CD300a molecule	CD300A	11314					0.000195909	19957.9	42768.1	2.14292	7.19189e-06	26100.2	73389.1	2.81182	1.94707e-06	36420.4	110950	3.04635	4.04184e-11	24508.1	142648	5.82045
217078_s_at	CD300a molecule	CD300A	11314									5.76467e-07	8730.55	34569.1	3.95955	7.62319e-09	11265.7	57862.2	5.13613	3.43905e-13	6240.58	70098.5	11.2327
1553043_a_at	CD300 molecule-like family member f	CD300LF	146722					1.09333e-05	18687.6	8241.98	-2.26737
203799_at	CD302 molecule	CD302	9936					6.0676e-05	22445.1	7778.38	-2.88558	2.26032e-08	30949.5	6726.3	-4.60127	2.58523e-10	27219.2	3582.62	-7.59757	7.12758e-10	9893.05	1567.25	-6.31236
242197_x_at	CD36 molecule (thrombospondin receptor)	CD36	948													0.00746834	593.2	#DIV/0!	#DIV/0!	0.00627476	1251.63	444.5	-2.81582
228766_at	CD36 molecule (thrombospondin receptor)	CD36	948													0.00197648	587.025	#DIV/0!	#DIV/0!
213539_at	CD3d molecule, delta (CD3-TCR complex)	CD3D	915													0.000598261	1330.22	#DIV/0!	#DIV/0!	1.28861e-06	3743.78	919.1	-4.07331
205456_at	CD3e molecule, epsilon (CD3-TCR complex)	CD3E	916																	0.00299501	1472.77	476.6	-3.09015
35150_at	CD40 molecule, TNF receptor superfamily member 5	CD40	958																	0.00127132	2559.93	1139.3	-2.24693
216056_at	CD44 molecule (Indian blood group)	CD44	960																	0.00129704	3413.15	954.075	-3.57744
217523_at	CD44 molecule (Indian blood group)	CD44	960																	0.00341044	3380.85	1330.43	-2.54118
1565868_at	CD44 molecule (Indian blood group)	CD44	960																	0.00987901	893.75	407.4	-2.19379
210916_s_at	CD44 molecule (Indian blood group)	CD44	960													0.00961837	2753.2	6203.95	2.25336
212014_x_at	CD44 molecule (Indian blood group)	CD44	960									0.00410673	9050.8	18737.8	2.07029	0.000804538	3532.32	8958.62	2.53618
209835_x_at	CD44 molecule (Indian blood group)	CD44	960									0.00275792	10165.9	22908.3	2.25344	0.000637704	3488.25	9264.52	2.65592
204490_s_at	CD44 molecule (Indian blood group)	CD44	960													0.000745579	2921.12	7860.68	2.69098
1557905_s_at	CD44 molecule (Indian blood group)	CD44	960													0.000138948	2682.02	8197.05	3.05629
211574_s_at	CD46 molecule, complement regulatory protein	CD46	4179									4.51166e-06	19189.1	9504.15	-2.01903
226016_at	CD47 molecule	CD47	961																	5.74675e-11	5679.05	1732.07	-3.27876
204118_at	CD48 molecule	CD48	962													7.50731e-05	13312.4	39211.9	2.94552	1.56559e-05	11495.3	39263.3	3.41559
34210_at	CD52 molecule	CD52	1043																	2.15015e-05	8609.25	1651.82	-5.21196
204661_at	CD52 molecule	CD52	1043													0.000273802	5408.37	1112.6	-4.86102	5.03273e-05	7594.33	2442.4	-3.10937
242946_at	CD53 molecule	CD53	963																	1.46591e-09	2440.95	5281.35	2.16365
203416_at	CD53 molecule	CD53	963																	7.37903e-09	32806.2	84504.8	2.57588
1555950_a_at	CD55 molecule, decay accelerating factor for complement (Cromer blood group)	CD55	1604																	9.45386e-07	7434.8	30109.7	4.04983
201925_s_at	CD55 molecule, decay accelerating factor for complement (Cromer blood group)	CD55	1604																	4.7616e-08	6570.38	26796	4.0783
201926_s_at	CD55 molecule, decay accelerating factor for complement (Cromer blood group)	CD55	1604																	1.49595e-08	4891.95	24580.1	5.02459
222061_at	CD58 molecule	CD58	965													4.55381e-10	2062.58	5646.45	2.73757	9.50032e-15	1485.4	4060.85	2.73384
205173_x_at	CD58 molecule	CD58	965																	2.15587e-14	10177.6	39456.1	3.87674
216942_s_at	CD58 molecule	CD58	965													9.0075e-10	11821.2	29187	2.46905	6.85778e-15	4851.18	19126.4	3.94264
211744_s_at	CD58 molecule	CD58	965													7.06231e-09	14774.4	33461.8	2.26485	3.56259e-15	5649.27	23026.8	4.07607
200663_at	CD63 molecule	CD63	967													2.85132e-09	32147.2	78702.4	2.44819	1.13094e-14	21452.3	86442.8	4.02954
203507_at	CD68 molecule	CD68	1973 /// 968													0.0112323	#DIV/0!	1278.47	#DIV/0!	0.00031288	#DIV/0!	1507.03	#DIV/0!
209795_at	CD69 molecule	CD69	969									0.00112017	2329.93	7234.43	3.105	0.00250103	956	3736.72	3.90871
209619_at	CD74 molecule, major histocompatibility complex, class II invariant chain	CD74	972																	8.16878e-07	9751.32	3162.35	-3.08357
205297_s_at	CD79b molecule, immunoglobulin-associated beta	CD79B	974																	1.90343e-06	2148.57	#DIV/0!	#DIV/0!
1554519_at	CD80 molecule	CD80	941																	0.002239	1336.07	531.2	-2.51519
207176_s_at	CD80 molecule	CD80	941																	3.34934e-05	1788.62	#DIV/0!	#DIV/0!
200675_at	CD81 molecule	CD81	975													0.000105755	4055.28	1975.1	-2.0532
203904_x_at	CD82 molecule	CD82	3732																	3.436e-09	5506.6	14028.2	2.54752
204440_at	CD83 molecule	CD83	9308					2.04232e-06	5121.05	15773	3.08004	5.79037e-08	4785.55	19418.2	4.05767	1.25753e-07	7632.05	30396.6	3.98276	2.4415e-09	6676.48	33236.9	4.97821
205988_at	CD84 molecule	CD84	8832					0.00226712	915.35	348	-2.63032
205758_at	CD8a molecule	CD8A	925																	8.75347e-09	3387.88	#DIV/0!	#DIV/0!
1553562_at	CD8b molecule	CD8B	652565 /// 926 /// 927																	0.0171194	1099.33	485.267	-2.26542
201005_at	CD9 molecule	CD9	928																	2.46053e-05	7421.07	32711.6	4.40793
206761_at	CD96 molecule	CD96	10225																	0.00398662	1020.53	448.7	-2.27442
202910_s_at	CD97 molecule	CD97	976																	1.31036e-05	4494.82	1461.23	-3.07607
205627_at	cytidine deaminase	CDA	978																	4.46781e-07	4149.8	14416.1	3.47394
233647_s_at	cytidine and dCMP deaminase domain containing 1	CDADC1	81602													1.5267e-07	922.75	2177.97	2.36031
228516_at	congenital dyserythropoietic anemia, type I	CDAN1	146059					1.92364e-05	702.275	344.525	-2.03839
201725_at	cell division cycle 123 homolog (S. cerevisiae)	CDC123	8872					3.5163e-06	7256.93	2765.72	-2.62388	9.67558e-08	8778.08	2821.1	-3.11158	9.73565e-09	6557.9	1645.95	-3.98426
210742_at	CDC14 cell division cycle 14 homolog A (S. cerevisiae)	CDC14A	8556																	4.8207e-08	1743.28	507.9	-3.43232
205288_at	CDC14 cell division cycle 14 homolog A (S. cerevisiae)	CDC14A	8556																	8.36303e-05	1065.75	440.9	-2.41721
202717_s_at	cell division cycle 16 homolog (S. cerevisiae)	CDC16	8881													0.00434749	1447.72	588.5	-2.46003
203213_at	cell division cycle 2, G1 to S and G2 to M	CDC2	983													0.0116595	599.833	#DIV/0!	#DIV/0!	9.52939e-05	2106.93	193.5	-10.8885
202892_at	cell division cycle 23 homolog (S. cerevisiae)	CDC23	8697													0.00022905	811.2	337.85	-2.40107	0.000110682	1246.72	477.725	-2.60971
223651_x_at	cell division cycle 23 homolog (S. cerevisiae)	CDC23	8697													5.16085e-06	1100.92	396.2	-2.77871	6.89115e-05	1625.5	631.025	-2.57597
201853_s_at	cell division cycle 25 homolog B (S. pombe)	CDC25B	994																	4.70066e-05	1847.7	#DIV/0!	#DIV/0!
225422_at	cell division cycle 26 homolog (S. cerevisiae)	CDC26	246184 /// 729948 /// 730314													6.42353e-08	5344.85	12929.9	2.41914	3.48355e-12	3865.3	14362.6	3.71577
217878_s_at	cell division cycle 27 homolog (S. cerevisiae)	CDC27	996																	3.2547e-10	4822	1571.62	-3.06816
214236_at	Cell division cycle 27 homolog (S. cerevisiae)	CDC27	996																	1.85036e-05	8910.67	3041.18	-2.93001
207428_x_at	cell division cycle 2-like 1 (PITSLRE proteins) /// cell division cycle 2-like 2 (PITSLRE proteins)	CDC2L1 /// CDC2L2	728642 /// 984																	1.39696e-12	2078.03	5263.25	2.5328
210474_s_at	cell division cycle 2-like 1 (PITSLRE proteins) /// cell division cycle 2-like 2 (PITSLRE proteins)	CDC2L1 /// CDC2L2	728642 /// 984																	1.18659e-09	#DIV/0!	3258.27	#DIV/0!
215329_s_at	cell division cycle 2-like 1 (PITSLRE proteins) /// cell division cycle 2-like 2 (PITSLRE proteins)	CDC2L1 /// CDC2L2	728642 /// 984																	2.68838e-09	#DIV/0!	4644.05	#DIV/0!
212401_s_at	cell division cycle 2-like 2 (PITSLRE proteins)	CDC2L2	728642																	1.67751e-10	6427.6	15344.1	2.38722
207318_s_at	cell division cycle 2-like 5 (cholinesterase-related cell division controller)	CDC2L5	8621									1.012e-07	4351.85	2099.75	-2.07256	1.98641e-07	4044.75	1793.38	-2.25538
207319_s_at	cell division cycle 2-like 5 (cholinesterase-related cell division controller)	CDC2L5	8621													6.1671e-07	1384	624.425	-2.21644
212899_at	cell division cycle 2-like 6 (CDK8-like)	CDC2L6	23097																	2.58635e-06	2518.93	5431.88	2.15643
212897_at	cell division cycle 2-like 6 (CDK8-like)	CDC2L6	23097																	4.77488e-07	#DIV/0!	3546.3	#DIV/0!
214464_at	CDC42 binding protein kinase alpha (DMPK-like)	CDC42BPA	8476																	0.0143858	848.525	289.833	-2.92763
209288_s_at	CDC42 effector protein (Rho GTPase binding) 3	CDC42EP3	10602									0.000657049	22317.2	44997.2	2.01625	7.04298e-07	16600.4	48670.6	2.9319
209287_s_at	CDC42 effector protein (Rho GTPase binding) 3	CDC42EP3	10602									0.000220631	5808.7	15522.3	2.67225	7.84823e-06	4074.5	13948	3.42325
209055_s_at	CDC5 cell division cycle 5-like (S. pombe)	CDC5L	988																	4.28701e-11	1855.4	4483.48	2.41645
204510_at	cell division cycle 7 homolog (S. cerevisiae)	CDC7	8317													0.00545524	960.425	#DIV/0!	#DIV/0!	9.26503e-05	2264	#DIV/0!	#DIV/0!
230060_at	cell division cycle associated 7	CDCA7	83879													2.13303e-05	606.2	#DIV/0!	#DIV/0!
225081_s_at	cell division cycle associated 7-like	CDCA7L	55536													0.00241011	1625.78	617.7	-2.63198
234932_s_at	CUB domain containing protein 1	CDCP1	64866													0.000592784	568.025	189.4	-2.99908
226056_at	Cdc42 GTPase-activating protein	CDGAP	57514									4.87475e-07	#DIV/0!	1247.6	#DIV/0!
220115_s_at	cadherin 10, type 2 (T2-cadherin)	CDH10	1008																	2.09178e-06	1865.6	515.3	-3.62042
206898_at	cadherin 19, type 2	CDH19	28513																	0.010215	1812.4	554.333	-3.26951
1569679_at	cadherin-like 22	CDH22	64405																	0.000261797	2816.83	1093.88	-2.5751
224527_at	cadherin-like 23	CDH23	64072																	0.00365102	#DIV/0!	646.433	#DIV/0!
214803_at	cadherin 6, type 2, K-cadherin (fetal kidney)	CDH6	---													0.0102467	1114.73	#DIV/0!	#DIV/0!	0.0119499	2496.07	#DIV/0!	#DIV/0!
217574_at	cadherin 8, type 2	CDH8	1006																	0.0141992	1589.05	344	-4.61933
207729_at	cadherin 9, type 2 (T1-cadherin)	CDH9	1007																	0.00546372	1306.8	#DIV/0!	#DIV/0!
201253_s_at	CDP-diacylglycerol--inositol 3-phosphatidyltransferase (phosphatidylinositol synthase)	CDIPT	10423					9.59666e-09	21011	7723.18	-2.72052	3.18315e-07	27358.2	12680.3	-2.15754	1.98952e-07	24371.5	9415.6	-2.58842
204252_at	cyclin-dependent kinase 2	CDK2	1017									4.54513e-07	1761.4	5150.95	2.92435	6.33005e-09	863.275	4231.95	4.9022
211804_s_at	cyclin-dependent kinase 2	CDK2	1017									0.000282546	614.6	2553.28	4.15437	2.43254e-06	354.6	1854.88	5.23089
201938_at	CDK2-associated protein 1	CDK2AP1	8099									5.89033e-07	2862.82	1067.85	-2.68092	1.18638e-09	3878.8	913.375	-4.24667	1.55407e-08	3718.12	1115.57	-3.33292
204995_at	cyclin-dependent kinase 5, regulatory subunit 1 (p35)	CDK5R1	8851													0.00464154	1825.47	685.9	-2.66143
235287_at	cyclin-dependent kinase 6	CDK6	1021																	0.00458061	751.933	359.9	-2.08928
224847_at	cyclin-dependent kinase 6	CDK6	1021									0.000546691	976.4	#DIV/0!	#DIV/0!
211297_s_at	cyclin-dependent kinase 7 (MO15 homolog, Xenopus laevis, cdk-activating kinase)	CDK7	1022													3.61725e-05	4188.57	8561.72	2.04407	2.3473e-08	2242.2	6492.17	2.89545
1553113_s_at	cyclin-dependent kinase 8	CDK8	1024																	0.0011912	869.867	297.5	-2.92392
236331_at	cyclin-dependent kinase-like 2 (CDC2-related kinase)	CDKL2	8999																	0.00211895	2480.53	452	-5.48789
202284_s_at	cyclin-dependent kinase inhibitor 1A (p21, Cip1)	CDKN1A	1026									0.000401709	7264.9	29978	4.12642	1.93835e-06	2588.88	32598.8	12.5919	3.51939e-06	2582.97	19035.3	7.36956
213183_s_at	Cyclin-dependent kinase inhibitor 1C (p57, Kip2)	CDKN1C	1028													0.000157428	726.167	#DIV/0!	#DIV/0!
222063_s_at	CDP-diacylglycerol synthase (phosphatidate cytidylyltransferase) 1	CDS1	1040																	0.0062461	1306.73	545.4	-2.39592
212864_at	CDP-diacylglycerol synthase (phosphatidate cytidylyltransferase) 2	CDS2	8760					2.88559e-08	3410.8	1169.55	-2.91634	2.98538e-06	5639.12	2461.82	-2.29063
233630_at	CDP-diacylglycerol synthase (phosphatidate cytidylyltransferase) 2	CDS2	8760					5.29479e-05	1277.12	503.8	-2.53498
212862_at	CDP-diacylglycerol synthase (phosphatidate cytidylyltransferase) 2	CDS2	8760					9.74401e-07	3888.25	1889.42	-2.0579
213554_s_at	CDV3 homolog (mouse)	CDV3	55573																	8.50456e-09	2683.5	6549.3	2.44058
207205_at	carcinoembryonic antigen-related cell adhesion molecule 4	CEACAM4	1089									0.000228864	2368.28	953.325	-2.48423
201884_at	carcinoembryonic antigen-related cell adhesion molecule 5	CEACAM5	1048													0.000146534	660.175	238.125	-2.77239	0.00231593	1059.8	416.55	-2.54423
203757_s_at	carcinoembryonic antigen-related cell adhesion molecule 6 (non-specific cross reacting antigen)	CEACAM6	4680									0.00107592	1059.08	516.133	-2.05194					3.5775e-14	6561.33	1007.5	-6.51249
211657_at	carcinoembryonic antigen-related cell adhesion molecule 6 (non-specific cross reacting antigen)	CEACAM6	4680													8.6289e-06	3337.97	1277.8	-2.61228	4.23766e-09	6904.55	1598.35	-4.3198
206676_at	carcinoembryonic antigen-related cell adhesion molecule 8	CEACAM8	1088													9.25962e-09	6267.47	1876.1	-3.34069	8.82951e-15	17133.3	2087.5	-8.20756
204039_at	CCAAT/enhancer binding protein (C/EBP), alpha	CEBPA	1050													9.11056e-05	2182.9	499.133	-4.37338
212501_at	CCAAT/enhancer binding protein (C/EBP), beta	CEBPB	1051																	4.20947e-10	38507.5	121471	3.15447
203973_s_at	CCAAT/enhancer binding protein (C/EBP), delta	CEBPD	1052					0.00256767	35811.3	16755.5	-2.13729	2.89397e-06	32301	8954.18	-3.60736	0.000192504	26627.3	10382.9	-2.56454
213006_at	CCAAT/enhancer binding protein (C/EBP), delta	CEBPD	1052					0.00239138	2452.9	949.3	-2.5839	3.23886e-05	1711.4	406.2	-4.2132
214523_at	CCAAT/enhancer binding protein (C/EBP), epsilon	CEBPE	1053																	1.33101e-06	3485.55	1340	-2.60116
223729_at	cat eye syndrome chromosome region, candidate 2	CECR2	27443																	0.00117754	1396.88	567.65	-2.4608
218592_s_at	cat eye syndrome chromosome region, candidate 5	CECR5	27440					1.70942e-07	308.75	1079.8	3.49733	1.54264e-10	263.2	1390.62	5.28353	0.000511492	799.475	1710.68	2.13975	0.000124674	1520.9	3726.6	2.45026
204029_at	cadherin, EGF LAG seven-pass G-type receptor 2 (flamingo homolog, Drosophila)	CELSR2	1952													0.00301045	1044.2	473.3	-2.20621	0.000578083	1346.47	355.3	-3.78966
212437_at	centromere protein B, 80kDa	CENPB	1059																	0.000419375	941.033	#DIV/0!	#DIV/0!
204739_at	centromere protein C 1	CENPC1	1060																	0.00519626	1575.2	749.85	-2.10069
223513_at	centromere protein J	CENPJ	55835													7.38999e-06	504.35	#DIV/0!	#DIV/0!	9.07705e-06	1042.53	271.6	-3.83846
222848_at	centromere protein K	CENPK	64105																	0.00102292	909.125	228.6	-3.97692
242207_at	centromere protein P	CENPP	100128361													7.81563e-06	595.25	294	-2.02466
219294_at	centromere protein Q	CENPQ	55166																	5.96209e-07	910.15	#DIV/0!	#DIV/0!
90265_at	centaurin, alpha 1	CENTA1	11033																	2.45826e-10	5275.33	2038.1	-2.58835
219358_s_at	centaurin, alpha 2	CENTA2	55803													2.20231e-05	985.475	405.567	-2.42987	1.84897e-05	1499.52	691.7	-2.16788
205213_at	centaurin, beta 1	CENTB1	9744																	0.00544832	#DIV/0!	1951.53	#DIV/0!
212476_at	centaurin, beta 2	CENTB2	23527																	2.76077e-07	7329.17	15284.4	2.08541
1552472_a_at	centaurin, beta 2	CENTB2	23527																	2.46127e-12	3197.32	8710.52	2.72432
214102_at	centaurin, delta 1	CENTD1	116984													5.32256e-07	1189.85	510.375	-2.33133
34206_at	centaurin, delta 2	CENTD2	116985																	1.9474e-14	5603.07	15266.8	2.72473
212516_at	centaurin, delta 2	CENTD2	116985																	1.52512e-11	3202.6	10494	3.27671
225789_at	centaurin, gamma 3	CENTG3	116988													0.000114669	2044.1	10512.7	5.14294	5.31222e-06	3228.5	8682.8	2.68942
231299_at	centaurin, gamma 3	CENTG3	116988													0.000282071	#DIV/0!	1821.62	#DIV/0!
242916_at	centrosomal protein 110kDa	CEP110	11064																	3.00129e-06	3594.28	1084.72	-3.31354
205642_at	centrosomal protein 110kDa	CEP110	11064													0.00352451	1313.97	464.9	-2.82634
215170_s_at	centrosomal protein 152kDa	CEP152	22995																	3.84893e-05	940.375	428.95	-2.19227
204251_s_at	centrosomal protein 164kDa	CEP164	22897																	0.00243499	#DIV/0!	570.433	#DIV/0!
1558953_s_at	centrosomal protein 164kDa	CEP164	22897													2.54265e-05	1748.68	705.5	-2.47863
212746_s_at	centrosomal protein 170kDa	CEP170	9859																	0.000111588	2216.1	4922	2.22102
1552717_s_at	centrosomal protein 170kDa /// centrosomal protein 170kDa-like	CEP170 /// CEP170L	645455 /// 9859																	4.54999e-06	#DIV/0!	2459.9	#DIV/0!
205250_s_at	centrosomal protein 290kDa	CEP290	80184																	0.000336787	1244.5	347.2	-3.58439
213165_at	centrosomal protein 350kDa	CEP350	9857																	5.99301e-09	3650.12	7612.4	2.08552
219242_at	centrosomal protein 63kDa	CEP63	80254					3.3683e-08	17762.5	6961.18	-2.55165									1.729e-06	3573.32	8098.37	2.26634
222151_s_at	centrosomal protein 63kDa	CEP63	80254					3.57304e-06	10024	4615.98	-2.17158									4.77282e-07	2567.7	6308.65	2.45693
212677_s_at	centrosomal protein 68kDa	CEP68	23177													5.94764e-09	1772.07	569.35	-3.11245	1.2049e-06	1988.22	774.9	-2.56578
212675_s_at	centrosomal protein 68kDa	CEP68	23177													6.80861e-07	1024.52	396.775	-2.58213
224150_s_at	centrosomal protein 70kDa	CEP70	80321																	0.000250342	793.767	241.2	-3.29091
52285_f_at	centrosomal protein 76kDa	CEP76	79959																	0.000136843	953.275	267.233	-3.5672
228774_at	centrosomal protein 78kDa	CEP78	84131																	3.86224e-05	2001.3	555.8	-3.60076
1561884_at	choline/ethanolamine phosphotransferase 1	CEPT1	10390																	0.00122294	2001.75	752.375	-2.66057
219375_at	choline/ethanolamine phosphotransferase 1	CEPT1	10390													0.000117037	1112.4	2415.15	2.17112
218421_at	ceramide kinase	CERK	64781													6.46617e-09	6425.55	23976.2	3.73139	1.35841e-10	4718.88	21136.7	4.47918
220335_x_at	carboxylesterase 3 (brain)	CES3	23491																	7.32222e-07	6496.17	3080.8	-2.1086
209194_at	centrin, EF-hand protein, 2	CETN2	1069																	0.00174648	#DIV/0!	2633.82	#DIV/0!
209662_at	centrin, EF-hand protein, 3 (CDC31 homolog, yeast)	CETN3	1070					9.64092e-06	823.9	340.4	-2.42039	1.31955e-06	806.25	291.375	-2.76705	6.64174e-06	1174.47	478.075	-2.45668	4.3162e-05	1634.8	749.6	-2.1809
210701_at	craniofacial development protein 1	CFDP1	10428									2.11303e-05	512.733	1808.65	3.52747	0.000645179	1014.4	2461.68	2.42673	9.97954e-05	1292.1	2886.62	2.23406
203166_at	craniofacial development protein 1	CFDP1	10428					2.05983e-06	920.925	3013	3.27171	3.95554e-08	1758.53	8205.25	4.66598	1.90896e-11	2009.03	15760.5	7.84483	7.35775e-13	1904.73	12390.7	6.50522
236588_at	Craniofacial development protein 1	CFDP1	10428									0.00169483	311.075	667.425	2.14554
206910_x_at	complement factor H-related 2	CFHR2	3080																	3.37681e-06	2747.5	670	-4.10075
233496_s_at	cofilin 2 (muscle)	CFL2	1073																	0.000163736	2136.4	393.475	-5.42957
224352_s_at	cofilin 2 (muscle)	CFL2	1073													0.00822512	566.6	#DIV/0!	#DIV/0!
208485_x_at	CASP8 and FADD-like apoptosis regulator	CFLAR	8837																	4.63499e-05	4769.25	9734.33	2.04106
210563_x_at	CASP8 and FADD-like apoptosis regulator	CFLAR	8837																	1.54782e-06	6972.17	14260.8	2.04539
210564_x_at	CASP8 and FADD-like apoptosis regulator	CFLAR	8837																	3.20066e-05	4964.05	10870.1	2.18977
237367_x_at	CASP8 and FADD-like apoptosis regulator	CFLAR	8837																	7.75512e-07	#DIV/0!	2598.17	#DIV/0!
214618_at	CASP8 and FADD-like apoptosis regulator	CFLAR	---													0.00135969	468.067	1239.1	2.64727
214906_x_at	hypothetical gene CG018	CG018	90634																	0.0036599	#DIV/0!	742.275	#DIV/0!
217972_at	coiled-coil-helix-coiled-coil-helix domain containing 3	CHCHD3	54927																	7.77451e-05	2264.92	1008.47	-2.24589
229595_at	coiled-coil-helix-coiled-coil-helix domain containing 4	CHCHD4	131474	6.52958e-06	602.6	289.1	-2.0844									4.78868e-05	1325.15	600.175	-2.20794
1562892_at	Coiled-coil-helix-coiled-coil-helix domain containing 5	CHCHD5	84269													0.000735425	780.033	384.3	-2.02975
218642_s_at	coiled-coil-helix-coiled-coil-helix domain containing 7	CHCHD7	79145													1.10537e-05	1749.27	727.267	-2.40527	0.0194405	#DIV/0!	1421.2	#DIV/0!
204258_at	chromodomain helicase DNA binding protein 1	CHD1	1105													3.31723e-07	9374.83	21959.5	2.34239	5.11305e-06	5684.83	11900.7	2.09342
235791_x_at	chromodomain helicase DNA binding protein 1	CHD1	1105																	0.000228356	3993.18	8480.52	2.12375
212539_at	chromodomain helicase DNA binding protein 1-like	CHD1L	9557																	0.00026169	1346.63	663	-2.03112
238070_at	Chromodomain helicase DNA binding protein 1-like	CHD1L	9557																	0.00570562	1168.17	#DIV/0!	#DIV/0!
203461_at	chromodomain helicase DNA binding protein 2	CHD2	1106																	1.49234e-05	1239.47	609.1	-2.03493
228999_at	chromodomain helicase DNA binding protein 2	CHD2	1106									5.59479e-07	10553.9	23711.4	2.24669	1.24705e-10	5475.55	19284.3	3.52189	7.33234e-06	4011.47	8162.9	2.03489
243134_at	Chromodomain helicase DNA binding protein 2	CHD2	---													1.32516e-09	2012.8	5171.78	2.56944	4.24931e-13	1240.85	4187.45	3.37466
225077_at	chromodomain helicase DNA binding protein 2	CHD2	1106																	7.36701e-13	4795.22	17143.3	3.57507
225951_s_at	Chromodomain helicase DNA binding protein 2	CHD2	1106													9.10683e-07	35546.6	113051	3.18037	6.57164e-12	18178.3	100587	5.53335
1554015_a_at	chromodomain helicase DNA binding protein 2	CHD2	1106													6.43358e-05	4304.05	10429.5	2.42317	1.03862e-10	#DIV/0!	5266.95	#DIV/0!
1554014_at	chromodomain helicase DNA binding protein 2	CHD2	1106													0.00034209	2109.43	6858.8	3.2515
244443_at	Chromodomain helicase DNA binding protein 2	CHD2	1106													1.01558e-08	1324.05	4522.4	3.41558
208806_at	chromodomain helicase DNA binding protein 3	CHD3	1107																	0.00111026	#DIV/0!	1303.58	#DIV/0!
234681_s_at	chromodomain helicase DNA binding protein 6	CHD6	84181																	0.00139345	712.233	#DIV/0!	#DIV/0!
1559591_s_at	choline dehydrogenase	CHDH	55349													0.00179174	1206	465.3	-2.59188	2.06584e-07	3030.93	722.75	-4.1936
205394_at	CHK1 checkpoint homolog (S. pombe)	CHEK1	1111																	0.000743693	863.833	220.3	-3.92117
202230_s_at	calcium homeostasis endoplasmic reticulum protein	CHERP	10523																	1.4927e-11	3238.98	10219.5	3.15518
218803_at	checkpoint with forkhead and ring finger domains	CHFR	55743																	4.94295e-10	4655.2	10376	2.2289
223931_s_at	checkpoint with forkhead and ring finger domains	CHFR	55743																	2.78677e-05	#DIV/0!	3877.9	#DIV/0!
223061_at	chitinase domain containing 1	CHID1	66005													0.00585118	533	#DIV/0!	#DIV/0!
204591_at	cell adhesion molecule with homology to L1CAM (close homolog of L1)	CHL1	10752																	0.00533683	1118.73	#DIV/0!	#DIV/0!
226350_at	choroideremia-like (Rab escort protein 2)	CHML	1122													2.38602e-05	603.975	111.4	-5.42168	7.80229e-05	833.975	#DIV/0!	#DIV/0!
218177_at	chromatin modifying protein 1B	CHMP1B	57132					6.45136e-08	10038.1	4652.35	-2.15765	1.04836e-08	12671.6	5140.4	-2.4651
202121_s_at	chromatin modifying protein 2A	CHMP2A	27243													3.4981e-10	22052.3	49686.3	2.25311	3.90637e-18	8975.95	43523.3	4.84889
202538_s_at	chromatin modifying protein 2B	CHMP2B	25978													6.76042e-14	9855.88	25563.9	2.59377	7.9848e-20	4969.65	21433.8	4.31293
202536_at	chromatin modifying protein 2B	CHMP2B	25978													2.5842e-09	8495	23112.8	2.72075	4.51783e-14	4524.12	19597.9	4.33186
202537_s_at	chromatin modifying protein 2B	CHMP2B	25978													1.61741e-12	10829.7	28929.8	2.67134	3.46459e-20	4488.45	25980.8	5.78836
218572_at	chromatin modifying protein 4A	CHMP4A	29082																	1.85209e-10	1779.88	3674.55	2.0645
218571_s_at	chromatin modifying protein 4A	CHMP4A	29082																	5.54487e-07	2207.8	5158.73	2.33659
225498_at	chromatin modifying protein 4B	CHMP4B	128866													2.45831e-11	15548.2	43154.3	2.77551	3.8601e-16	8482.47	36618.9	4.317
225119_at	chromatin modifying protein 4B	CHMP4B	128866									2.50709e-05	952.9	2603.03	2.73169
219356_s_at	chromatin modifying protein 5	CHMP5	51510																	3.27188e-12	5991.72	16753.2	2.79606
1557769_at	Chimerin (chimaerin) 2	CHN2	---																	0.010685	815.633	313	-2.60586
218566_s_at	cysteine and histidine-rich domain (CHORD)-containing 1	CHORDC1	26973																	2.15443e-07	4239.85	1485.57	-2.85401
214665_s_at	calcium binding protein P22	CHP	11261																	1.16295e-09	5967.15	15625.1	2.61851
207993_s_at	calcium binding protein P22	CHP	11261													4.84124e-07	1723.5	4226.18	2.45209
1559739_at	Choline phosphotransferase 1	CHPT1	56994													0.000164244	748.525	273.5	-2.73684
226368_at	Carbohydrate (chondroitin 4) sulfotransferase 11	CHST11	50515					4.51668e-06	12722.4	5851.53	-2.17421									5.33126e-08	4445.57	12244	2.7542
226372_at	Carbohydrate (chondroitin 4) sulfotransferase 11	CHST11	50515																	1.13653e-13	5975.57	26323.5	4.40517
219634_at	carbohydrate (chondroitin 4) sulfotransferase 11	CHST11	50515													2.51377e-11	9359.33	25876.3	2.76476	4.40319e-19	2887.1	18275.3	6.32998
218927_s_at	carbohydrate (chondroitin 4) sulfotransferase 12	CHST12	55501									0.000160633	819.425	#DIV/0!	#DIV/0!	8.16027e-06	1522.85	#DIV/0!	#DIV/0!	7.74624e-07	2710.15	591.2	-4.58415
222786_at	carbohydrate (chondroitin 4) sulfotransferase 12	CHST12	55501									0.00327747	510.233	248.8	-2.05078
239647_at	carbohydrate (chondroitin 4) sulfotransferase 13	CHST13	166012					4.94265e-05	1649.75	423.033	-3.89981	3.1751e-06	2619.25	350.5	-7.4729	2.1941e-07	3502.15	424.3	-8.25395	4.96785e-06	2475.85	#DIV/0!	#DIV/0!
226314_at	carbohydrate (N-acetylgalactosamine 4-0) sulfotransferase 14	CHST14	113189													0.000529373	724.367	#DIV/0!	#DIV/0!	0.00371286	1644.4	720.3	-2.28294
203921_at	carbohydrate (N-acetylglucosamine-6-O) sulfotransferase 2	CHST2	9435					0.000823928	958.375	2651.27	2.76643					0.00124758	759.567	2608	3.43354
206756_at	carbohydrate (N-acetylglucosamine 6-O) sulfotransferase 7	CHST7	56548																	9.94152e-12	3137.37	21551.4	6.86926
203044_at	carbohydrate (chondroitin) synthase 1	CHSY1	22856																	9.24954e-08	6449.9	24020.6	3.72417
233268_s_at	churchill domain containing 1	CHURC1	91612																	7.60519e-05	3747.2	7945.1	2.12028
217501_at	cytosolic iron-sulfur protein assembly 1 homolog (S. cerevisiae)	CIAO1	9391									6.39317e-08	2767.68	1216.62	-2.27488
201953_at	calcium and integrin binding 1 (calmyrin)	CIB1	10519																	9.97381e-05	5688.12	11536.6	2.0282
224914_s_at	cytokine induced protein 29 kDa /// DnaJ (Hsp40) homolog, subfamily C, member 14	CIP29 /// DNAJC14	84324																	8.20869e-08	2276.72	4699.45	2.06413
209571_at	CBF1 interacting corepressor	CIR	9541																	2.03003e-07	2600.38	7121.38	2.7386
226689_at	CDGSH iron sulfur domain 2	CISD2	493856									0.000178857	1639.28	3668.85	2.23809	5.02461e-06	1603.5	3999.45	2.4942	4.72275e-07	1823.35	5371.4	2.9459
226686_at	CDGSH iron sulfur domain 2	CISD2	493856									8.0033e-05	1458.28	3186.83	2.18534	2.74961e-06	959.05	3444.85	3.59194	4.15344e-06	1079.73	3245.4	3.00577
209357_at	Cbp/p300-interacting transactivator, with Glu/Asp-rich carboxy-terminal domain, 2	CITED2	10370																	3.45974e-08	2221.5	5497.2	2.47454
207980_s_at	Cbp/p300-interacting transactivator, with Glu/Asp-rich carboxy-terminal domain, 2	CITED2	10370													7.12234e-07	1843.65	3932.52	2.13301
218252_at	cytoskeleton associated protein 2	CKAP2	26586					0.000879323	655.125	306.175	-2.13971									9.94544e-10	1577.12	447.2	-3.52667
200998_s_at	cytoskeleton-associated protein 4	CKAP4	10970													1.19944e-05	3089.8	6704.88	2.17
200999_s_at	cytoskeleton-associated protein 4	CKAP4	10970													5.59597e-08	4636.48	10748.6	2.31827
204170_s_at	CDC28 protein kinase regulatory subunit 2	CKS2	1164													0.000497479	1550.45	4598.25	2.96575	4.92825e-06	1739.42	8017.02	4.60901
212308_at	cytoplasmic linker associated protein 2	CLASP2	23122													4.82676e-05	522.325	239.4	-2.18181	5.72654e-08	1006.18	304.775	-3.30137
212306_at	cytoplasmic linker associated protein 2	CLASP2	23122																	1.20352e-07	2572.1	1169.03	-2.20021
206207_at	Charcot-Leyden crystal protein	CLC	1178									2.46541e-09	28986.6	6542.9	-4.43023	4.79344e-15	54320.4	4730.43	-11.4832	1.21651e-17	90909.3	4933.85	-18.4256
206165_s_at	chloride channel, calcium activated, family member 2	CLCA2	9635																	0.000300754	774.2	#DIV/0!	#DIV/0!
201734_at	Chloride channel 3	CLCN3	1182													7.39969e-05	1855.88	900.35	-2.06128	5.68192e-07	2773.4	1075.72	-2.57817
206704_at	chloride channel 5 (nephrolithiasis 2, X-linked, Dent disease)	CLCN5	1184																	5.41239e-05	1119	402.167	-2.78243
38069_at	chloride channel 7	CLCN7	1186													1.37953e-05	4717.82	12203	2.58658	6.93183e-11	3322.05	15626.5	4.70388
209235_at	chloride channel 7	CLCN7	1186																	4.45992e-05	#DIV/0!	3921.4	#DIV/0!
1554749_s_at	chloride channel Kb	CLCNKB	1188																	0.00345443	1599.97	738.8	-2.16563
205328_at	claudin 10	CLDN10	9071																	5.81739e-05	1332.73	462.3	-2.88283
214598_at	claudin 8	CLDN8	9073																	0.000793783	1581.18	397.375	-3.97905
1552398_a_at	C-type lectin domain family 12, member A	CLEC12A	160364 /// 387837													0.00978903	4595.15	1529.55	-3.00425
209732_at	C-type lectin domain family 2, member B	CLEC2B	9976																	1.23997e-14	30705.8	147781	4.81281
220132_s_at	C-type lectin domain family 2, member D	CLEC2D	29121																	2.06591e-06	1546.75	531.95	-2.9077
219859_at	C-type lectin domain family 4, member E	CLEC4E	26253																	2.08006e-05	2753.02	6610.33	2.40111
222934_s_at	C-type lectin domain family 4, member E	CLEC4E	26253													9.34775e-10	26936.8	93009.3	3.45288	1.79182e-15	16000.3	117316	7.33208
221698_s_at	C-type lectin domain family 7, member A	CLEC7A	64581									0.00118699	52123.6	21761.2	-2.39526	0.00372068	90637.4	35054.3	-2.58563
1555756_a_at	C-type lectin domain family 7, member A	CLEC7A	64581									0.00281234	45024.4	20194.7	-2.22952
1554406_a_at	C-type lectin domain family 7, member A	CLEC7A	64581									0.00408807	15651.2	7502.38	-2.08617
1555214_a_at	C-type lectin domain family 7, member A	CLEC7A	64581					0.00251835	7695.38	2227.05	-3.45541
205830_at	calmegin	CLGN	1047																	0.00322124	3503.38	736.625	-4.75598
208659_at	chloride intracellular channel 1	CLIC1	1192																	2.6327e-11	16274.5	44705.3	2.74696
201560_at	chloride intracellular channel 4	CLIC4	25932									1.31482e-07	1929	16659.9	8.63653	7.54526e-08	1286.05	12948.1	10.0681	0.0127278	2617.93	6150.9	2.34953
221881_s_at	chloride intracellular channel 4	CLIC4	25932													0.00149802	#DIV/0!	2655.35	#DIV/0!	0.0193585	#DIV/0!	1444.67	#DIV/0!
201559_s_at	chloride intracellular channel 4	CLIC4	25932													1.69055e-05	845.7	3998.38	4.72789
201975_at	CAP-GLY domain containing linker protein 1	CLIP1	6249																	1.04655e-08	1315.52	3994.15	3.03616
219944_at	CAP-GLY domain containing linker protein family, member 4	CLIP4	79745																	0.00149158	1086.97	419.75	-2.58958
226425_at	CAP-GLY domain containing linker protein family, member 4	CLIP4	79745																	0.00214688	1597.43	655.275	-2.43779
214683_s_at	CDC-like kinase 1	CLK1	1195													3.18932e-08	13380.6	32277.8	2.41229	1.3085e-13	7697.65	28899.7	3.75435
203229_s_at	CDC-like kinase 2	CLK2	1196													6.86783e-05	4435.5	9643.65	2.1742	8.76157e-11	#DIV/0!	10382.9	#DIV/0!
202140_s_at	CDC-like kinase 3	CLK3	1198													5.47103e-14	5053.65	14030.2	2.77625	4.00977e-20	2674.97	13184.3	4.92877
225759_x_at	calmin (calponin-like, transmembrane)	CLMN	79789													0.000120041	681.667	#DIV/0!	#DIV/0!	0.000402743	1336.27	424.1	-3.15083
210859_x_at	ceroid-lipofuscinosis, neuronal 3, juvenile (Batten, Spielmeyer-Vogt disease)	CLN3	1201									7.19935e-06	3465.88	6973.2	2.01196	4.07909e-13	3235.57	12460.3	3.85104	1.42473e-14	2842.9	11950.1	4.20348
209275_s_at	ceroid-lipofuscinosis, neuronal 3, juvenile (Batten, Spielmeyer-Vogt disease)	CLN3	1201													4.85466e-10	3223.47	12220.4	3.79107	9.14214e-13	2809.55	14439.8	5.13954
1567079_at	ceroid-lipofuscinosis, neuronal 6, late infantile, variant	CLN6	54982									6.74995e-05	#DIV/0!	517.567	#DIV/0!
223912_s_at	ceroid-lipofuscinosis, neuronal 8 (epilepsy, progressive with mental retardation)	CLN8	2055									7.13918e-05	475.433	1436.43	3.02131	5.20628e-07	1030.6	2408.17	2.33667	2.96937e-13	#DIV/0!	3789.2	#DIV/0!
222874_s_at	ceroid-lipofuscinosis, neuronal 8 (epilepsy, progressive with mental retardation)	CLN8	2055									0.00133176	512.275	1495.53	2.91938	7.18364e-05	#DIV/0!	2792.35	#DIV/0!	2.61027e-08	#DIV/0!	3832.2	#DIV/0!
229958_at	ceroid-lipofuscinosis, neuronal 8 (epilepsy, progressive with mental retardation)	CLN8	2055													0.0021963	#DIV/0!	2506.53	#DIV/0!	2.84466e-06	#DIV/0!	3322.12	#DIV/0!
219341_at	ceroid-lipofuscinosis, neuronal 8 (epilepsy, progressive with mental retardation)	CLN8	2055																	0.00205727	#DIV/0!	1579.17	#DIV/0!
209143_s_at	chloride channel, nucleotide-sensitive, 1A	CLNS1A	1207													0.00197604	1308.35	556.425	-2.35135	0.00193471	2114.78	835.95	-2.52979
204980_at	clock homolog (mouse)	CLOCK	9575													4.27093e-07	1025.73	#DIV/0!	#DIV/0!	2.97385e-05	1933.57	897.7	-2.15391
223020_at	CLPTM1-like	CLPTM1L	81037																	8.98e-13	2554.5	10282.4	4.02522
204809_at	ClpX caseinolytic peptidase X homolog (E. coli)	CLPX	10845																	2.7113e-06	2481.35	5293.75	2.13342
1560434_x_at	clathrin, light chain (Lca)	CLTA	1211																	6.8931e-06	3510.03	1113.97	-3.1509
204050_s_at	clathrin, light chain (Lca)	CLTA	1211																	6.1686e-07	3823.78	8834.38	2.31038
200960_x_at	clathrin, light chain (Lca)	CLTA	1211																	1.12335e-09	5327.83	14955.2	2.807
216295_s_at	clathrin, light chain (Lca)	CLTA	1211													1.20621e-06	5358.85	11866.4	2.21436	4.36769e-09	3422.05	9724.77	2.8418
210498_at	clathrin, heavy chain (Hc)	CLTC	1213																	0.000631074	1625.53	568.05	-2.86159
200614_at	clathrin, heavy chain (Hc)	CLTC	1213																	6.46708e-20	10031.1	31234.2	3.11374
205518_s_at	cytidine monophosphate-N-acetylneuraminic acid hydroxylase (CMP-N-acetylneuraminate monooxygenase)	CMAH	8418									0.000785811	661.475	273.5	-2.41856
241065_x_at	Cytidine monophosphate N-acetylneuraminic acid synthetase	CMAS	55907													0.00362872	1320.47	434.425	-3.03959	0.00299102	2193.07	785.75	-2.79106
234981_x_at	carboxymethylenebutenolidase homolog (Pseudomonas)	CMBL	134147													1.46616e-05	33712.4	16585.2	-2.03268	3.10617e-05	58585.8	28795.5	-2.03455
225009_at	CKLF-like MARVEL transmembrane domain containing 4	CMTM4	146223													0.000222504	881.35	343.8	-2.56355
217947_at	CKLF-like MARVEL transmembrane domain containing 6	CMTM6	54918																	1.39287e-07	37158.1	79905.4	2.15042
223047_at	CKLF-like MARVEL transmembrane domain containing 6	CMTM6	54918																	1.03234e-08	23402.2	51476.9	2.19966
1552587_at	cyclic nucleotide binding domain containing 1	CNBD1	168975													0.00158975	583.25	285.925	-2.03987
206158_s_at	CCHC-type zinc finger, nucleic acid binding protein	CNBP	7555																	4.49782e-14	18407.7	71642.1	3.89197
217752_s_at	CNDP dipeptidase 2 (metallopeptidase M20 family)	CNDP2	55748									1.01891e-05	2122.1	973.175	-2.18059	2.10592e-05	2542.73	1131.67	-2.24687
206417_at	cyclic nucleotide gated channel alpha 1	CNGA1	1259																	0.00289219	1299.8	553.333	-2.34904
201653_at	cornichon homolog (Drosophila)	CNIH	10175																	0.00154854	2589.32	1179.95	-2.19444
228306_at	cornichon homolog 4 (Drosophila)	CNIH4	29097													0.000209565	836	#DIV/0!	#DIV/0!	3.81683e-08	1394.7	#DIV/0!	#DIV/0!
229116_at	connector enhancer of kinase suppressor of Ras 2	CNKSR2	22866																	0.0100285	2410.12	#DIV/0!	#DIV/0!
220739_s_at	cyclin M3	CNNM3	26505									2.64944e-06	3797.55	1701.8	-2.23149
218900_at	cyclin M4	CNNM4	26504																	0.00194535	#DIV/0!	776.567	#DIV/0!
1554052_at	CCR4-NOT transcription complex, subunit 1	CNOT1	23019																	1.34988e-06	#DIV/0!	2506.43	#DIV/0!
222182_s_at	CCR4-NOT transcription complex, subunit 2	CNOT2	4848													1.59558e-06	5881.07	12265	2.08551	2.34164e-07	4156.93	9145.48	2.20006
203239_s_at	CCR4-NOT transcription complex, subunit 3	CNOT3	4849																	5.50433e-13	1148.7	3869.43	3.36853
211141_s_at	CCR4-NOT transcription complex, subunit 3	CNOT3	4849																	5.70577e-06	#DIV/0!	803.875	#DIV/0!
229143_at	CCR4-NOT transcription complex, subunit 3	CNOT3	4849																	3.08529e-05	#DIV/0!	597.65	#DIV/0!
217970_s_at	CCR4-NOT transcription complex, subunit 6	CNOT6	57472																	1.82935e-07	1864.03	#DIV/0!	#DIV/0!
227119_at	CCR4-NOT transcription complex, subunit 6-like	CNOT6L	246175													2.77257e-06	4200.48	1935.92	-2.16975	5.19363e-11	7242.6	2085.78	-3.47238
202162_s_at	CCR4-NOT transcription complex, subunit 8	CNOT8	9337													1.323e-10	5229.68	12251.4	2.34266	5.73415e-13	3419.85	10205	2.98406
202164_s_at	CCR4-NOT transcription complex, subunit 8	CNOT8	9337													3.28093e-10	6339.2	16242.6	2.56226	1.33313e-13	3601.3	12259.1	3.40408
202163_s_at	CCR4-NOT transcription complex, subunit 8	CNOT8	9337													4.68614e-07	4557.6	9946.88	2.18248	1.27832e-09	#DIV/0!	8144.05	#DIV/0!
206586_at	cannabinoid receptor 2 (macrophage)	CNR2	1269																	9.74108e-08	2633.25	1007.25	-2.6143
1554784_at	contactin 1	CNTN1	1272																	0.00171528	986.6	153.4	-6.43155
227209_at	Contactin 1	CNTN1	1272																	0.00837281	991.733	261.2	-3.79684
211203_s_at	contactin 1	CNTN1	1272													0.0153552	844.5	#DIV/0!	#DIV/0!
233202_at	contactin associated protein-like 3	CNTNAP3	79937													5.39608e-05	996.875	332.7	-2.99632	2.01813e-05	1695.47	615.933	-2.75269
223796_at	contactin associated protein-like 3 /// contactin associated protein-like 3B /// similar to Contactin-associated protein-like 3 precursor (Cell recognition molecule Caspr3)	CNTNAP3 /// CNTNAP3B /// LOC728577	389722 /// 643827 /// 653355 /// 728577 /// 79937									4.99607e-05	1655.38	541.175	-3.05885	9.81493e-07	1596.17	402.35	-3.96713	2.2835e-05	2674.82	810.85	-3.29879
201913_s_at	Coenzyme A synthase	COASY	80347																	0.00281759	#DIV/0!	2287.2	#DIV/0!
203642_s_at	COBL-like 1	COBLL1	22837													0.000906696	1228.27	314.433	-3.90629	5.83313e-06	2464.25	497.15	-4.95675
231813_s_at	component of oligomeric golgi complex 1	COG1	9382													0.00964908	600.867	289.033	-2.07888
203073_at	component of oligomeric golgi complex 2	COG2	22796													7.22228e-06	996.575	359.233	-2.77417	1.14226e-07	1802.97	436.533	-4.13021
225769_at	component of oligomeric golgi complex 6	COG6	57511													0.000356635	1438.62	564.8	-2.54714	9.71054e-06	2852.15	812.175	-3.51174
216993_s_at	collagen, type XI, alpha 2	COL11A2	1302																	6.51357e-05	2008.2	932.3	-2.15403
216865_at	collagen, type XIV, alpha 1 (undulin)	COL14A1	7373																	0.0230454	942.033	450.567	-2.09077
203477_at	collagen, type XV, alpha 1	COL15A1	1306									0.000817015	72	963.7	13.3847					0.00765664	#DIV/0!	1138.88	#DIV/0!
209082_s_at	collagen, type XVIII, alpha 1	COL18A1	80781													2.2648e-05	1615.5	587.55	-2.74955
202403_s_at	collagen, type I, alpha 2	COL1A2	1278													0.00192785	855.167	#DIV/0!	#DIV/0!
215076_s_at	collagen, type III, alpha 1 (Ehlers-Danlos syndrome type IV, autosomal dominant)	COL3A1	1281																	0.000398659	2334.23	375.275	-6.22004
211161_s_at	collagen, type III, alpha 1 (Ehlers-Danlos syndrome type IV, autosomal dominant)	COL3A1	1281																	0.00177218	1063.75	292.3	-3.63924
232458_at	Collagen, type III, alpha 1 (Ehlers-Danlos syndrome type IV, autosomal dominant)	COL3A1	1281																	0.0106998	1878.02	#DIV/0!	#DIV/0!
223466_x_at	collagen, type IV, alpha 3 (Goodpasture antigen) binding protein	COL4A3BP	10087																	1.58928e-10	3944.1	12844.7	3.25668
219625_s_at	collagen, type IV, alpha 3 (Goodpasture antigen) binding protein	COL4A3BP	10087																	2.08579e-13	2914.77	14118.8	4.8439
223465_at	collagen, type IV, alpha 3 (Goodpasture antigen) binding protein	COL4A3BP	10087													3.9013e-10	5922.5	15968.5	2.69624	2.60003e-17	2352.75	13752	5.84507
221729_at	collagen, type V, alpha 2	COL5A2	1290																	0.00292547	1340.12	286	-4.68575
213622_at	collagen, type IX, alpha 2	COL9A2	1298													2.32466e-05	958.85	429.133	-2.23439
221019_s_at	collectin sub-family member 12	COLEC12	81035													0.00062938	559.2	1551.17	2.77392
226024_at	copper metabolism (Murr1) domain containing 1	COMMD1	150684													0.00113242	625.833	267.25	-2.34175	0.000813777	770.067	279	-2.7601
222637_at	COMM domain containing 10	COMMD10	51397													4.106e-06	1582	588.025	-2.69036	1.87293e-09	3431.72	803.725	-4.26978
223491_at	COMM domain containing 2	COMMD2	51122					3.06845e-06	2373.62	993.725	-2.38861
209132_s_at	COMM domain containing 4	COMMD4	54939													0.000385263	#DIV/0!	2757.17	#DIV/0!	1.04648e-06	#DIV/0!	3538.08	#DIV/0!
206441_s_at	COMM domain containing 4	COMMD4	54939																	0.000510118	#DIV/0!	2216.85	#DIV/0!
224815_at	COMM domain containing 7	COMMD7	149951													2.11905e-06	2018.93	662.967	-3.04529	2.45105e-06	2480.87	776.25	-3.19596
208818_s_at	catechol-O-methyltransferase	COMT	1312																	0.00106384	1185.68	#DIV/0!	#DIV/0!
208684_at	coatomer protein complex, subunit alpha	COPA	1314																	4.96153e-11	4481.68	10641	2.37433
201359_at	coatomer protein complex, subunit beta 1	COPB1	1315																	7.62002e-10	5355.75	11533.1	2.15341
201358_s_at	coatomer protein complex, subunit beta 1	COPB1	1315																	8.81772e-12	8953.62	20501.9	2.28979
201098_at	coatomer protein complex, subunit beta 2 (beta prime)	COPB2	9276																	4.23568e-17	3395.22	14407.1	4.24334
201264_at	coatomer protein complex, subunit epsilon	COPE	11316													0.00115383	3956.35	9150.7	2.31291	6.97588e-12	#DIV/0!	12332.4	#DIV/0!
202467_s_at	COP9 constitutive photomorphogenic homolog subunit 2 (Arabidopsis)	COPS2	9318																	3.13627e-09	3275.45	7630.92	2.32973
214260_at	COP9 constitutive photomorphogenic homolog subunit 8 (Arabidopsis)	COPS8	10920																	0.00104741	1548.77	259	-5.97979
217726_at	coatomer protein complex, subunit zeta 1	COPZ1	22818																	0.0101449	#DIV/0!	5216.95	#DIV/0!
219397_at	coenzyme Q10 homolog B (S. cerevisiae)	COQ10B	80219																	1.50616e-16	3539.57	11817.8	3.33878
210820_x_at	coenzyme Q7 homolog, ubiquinone (yeast)	COQ7	10229																	0.000151612	#DIV/0!	1246.42	#DIV/0!
239260_at	corin, serine peptidase	CORIN	10699									1.05818e-07	#DIV/0!	2174.57	#DIV/0!	0.00240514	#DIV/0!	1744.93	#DIV/0!	0.00165492	#DIV/0!	2394.07	#DIV/0!
239261_s_at	corin, serine peptidase	CORIN	10699													1.16961e-05	#DIV/0!	1913.45	#DIV/0!	0.0014989	#DIV/0!	2503.35	#DIV/0!
220356_at	corin, serine peptidase	CORIN	10699									0.000130574	#DIV/0!	531.775	#DIV/0!
209083_at	coronin, actin binding protein, 1A	CORO1A	11151													1.97433e-07	45995	21910.2	-2.09925	1.02885e-09	29703.4	11904.2	-2.49521
222409_at	coronin, actin binding protein, 1C	CORO1C	23603													0.000257746	4975.32	10409.6	2.09225	2.29917e-10	1686.13	7723.93	4.58087
221676_s_at	coronin, actin binding protein, 1C	CORO1C	23603													1.614e-07	10794.4	28393.2	2.63036	1.07148e-14	3967.5	23288.3	5.86977
211727_s_at	COX11 homolog, cytochrome c oxidase assembly protein (yeast)	COX11	1353													3.615e-05	1546.7	511.35	-3.02474	8.95012e-07	3213.75	861.75	-3.72933
235533_at	COX19 cytochrome c oxidase assembly homolog (S. cerevisiae)	COX19	90639													2.81354e-05	1194.82	542.325	-2.20315
202698_x_at	cytochrome c oxidase subunit IV isoform 1	COX4I1	1327																	9.03325e-11	16833.4	41811	2.48381
200086_s_at	cytochrome c oxidase subunit IV isoform 1	COX4I1	1327																	7.93289e-12	10635.8	31305.5	2.9434
213758_at	cytochrome c oxidase subunit IV isoform 1	COX4I1	1327																	4.36217e-07	#DIV/0!	1815.17	#DIV/0!
200925_at	cytochrome c oxidase subunit VIa polypeptide 1	COX6A1	1337																	9.19715e-13	6336.68	19372.6	3.05722
201754_at	cytochrome c oxidase subunit VIc	COX6C	1345													0.000296038	3014.43	1165.2	-2.58705	1.40538e-06	5290.2	1302.05	-4.06298
201256_at	cytochrome c oxidase subunit VIIa polypeptide 2 like	COX7A2L	9167													3.65778e-07	4653.57	10031.2	2.1556	6.42768e-07	5072.25	10460.5	2.06229
202110_at	cytochrome c oxidase subunit VIIb	COX7B	1349																	7.12171e-11	6805.6	13629.8	2.00273
227253_at	ceruloplasmin (ferroxidase)	CP	1356																	0.00264225	1777.48	776.825	-2.28813
201941_at	carboxypeptidase D	CPD	1362																	2.93572e-13	5036.9	18701	3.71281
201940_at	carboxypeptidase D	CPD	1362																	4.14184e-11	3347.8	12699.6	3.79341
201943_s_at	carboxypeptidase D	CPD	1362													4.91309e-05	8386.82	17201.3	2.05099	7.12356e-14	2790.53	15100.3	5.41127
201942_s_at	carboxypeptidase D	CPD	1362													0.000141273	4581.8	13376.5	2.91949
235462_at	Cytoplasmic polyadenylation element binding protein 2	CPEB2	132864																	2.81851e-06	1309.83	497	-2.63546
1555250_a_at	cytoplasmic polyadenylation element binding protein 3	CPEB3	22849																	1.97475e-06	1430.17	424.6	-3.36829
205773_at	cytoplasmic polyadenylation element binding protein 3	CPEB3	22849																	4.80438e-06	859.2	#DIV/0!	#DIV/0!
224829_at	cytoplasmic polyadenylation element binding protein 4	CPEB4	80315																	4.98263e-07	1751.9	5240.72	2.99145
235019_at	carboxypeptidase M	CPM	1368																	0.000491933	1140.57	517.9	-2.20231
225129_at	copine II	CPNE2	221184									3.90798e-06	1911.75	824.65	-2.31826					1.46453e-08	974.825	383.6	-2.54125
228365_at	copine VIII	CPNE8	144402																	0.000281982	896.7	#DIV/0!	#DIV/0!
204920_at	carbamoyl-phosphate synthetase 1, mitochondrial	CPS1	1373																	0.000897184	1514.17	386.7	-3.91561
225986_x_at	cleavage and polyadenylation specific factor 2, 100kDa	CPSF2	53981													2.63e-05	8847.75	3130	-2.82676	0.000612947	14323.9	7157.38	-2.00127
225082_at	cleavage and polyadenylation specific factor 3, 73kDa	CPSF3	51692													0.00418934	914.833	#DIV/0!	#DIV/0!	8.23797e-07	1261.8	#DIV/0!	#DIV/0!
224312_x_at	cleavage and polyadenylation specific factor 3-like	CPSF3L	54973																	1.00161e-10	#DIV/0!	2809.53	#DIV/0!
233563_s_at	cleavage and polyadenylation specific factor 3-like	CPSF3L	54973																	2.60235e-09	#DIV/0!	1890.67	#DIV/0!
233625_x_at	cleavage and polyadenylation specific factor 3-like	CPSF3L	54973																	0.000218065	#DIV/0!	3606.7	#DIV/0!
217994_x_at	cleavage and polyadenylation specific factor 3-like	CPSF3L	54973																	0.000634037	#DIV/0!	3277.2	#DIV/0!
206688_s_at	cleavage and polyadenylation specific factor 4, 30kDa	CPSF4	10898																	8.90016e-05	#DIV/0!	2474.75	#DIV/0!
204264_at	carnitine palmitoyltransferase II	CPT2	1376					4.4562e-06	1157.58	576.6	-2.00759	1.08102e-09	1226.22	474.767	-2.5828
217239_x_at	Immunoglobulin heavy chain, partial, clone VH3-7 /// Carboxypeptidase, vitellogenic-like	CPVL	---																	0.000781649	1179.87	475.1	-2.48341
206244_at	complement component (3b/4b) receptor 1 (Knops blood group)	CR1	1378																	2.5232e-06	#DIV/0!	1739.78	#DIV/0!
244313_at	complement component (3b/4b) receptor 1 (Knops blood group)	CR1	1378													8.14787e-07	3038.88	1167.03	-2.60395
1563897_at	Cellular retinoic acid binding protein 1	CRABP1	1381																	0.00118973	696.167	#DIV/0!	#DIV/0!
225172_at	Crm, cramped-like (Drosophila)	CRAMP1L	57585 /// 90861													3.23137e-05	1588.58	769.475	-2.06449
214513_s_at	cAMP responsive element binding protein 1	CREB1	1385																	7.61574e-07	2101.12	4279.95	2.03698
204312_x_at	cAMP responsive element binding protein 1	CREB1	1385																	2.58564e-07	2298.35	5464.02	2.37737
204314_s_at	cAMP responsive element binding protein 1	CREB1	1385																	1.50731e-09	3363.5	9014	2.67995
204313_s_at	cAMP responsive element binding protein 1	CREB1	1385																	2.08703e-11	3674.92	11498.3	3.12887
209432_s_at	cAMP responsive element binding protein 3	CREB3	10488									3.51976e-08	#DIV/0!	2829.97	#DIV/0!	1.15629e-09	#DIV/0!	3465.9	#DIV/0!
229228_at	cAMP responsive element binding protein 5	CREB5	9586					0.000242742	4984.5	1407.15	-3.54227	0.000137739	8062.35	1960.1	-4.11323	1.27082e-06	9055.5	1446.08	-6.26212
205931_s_at	cAMP responsive element binding protein 5	CREB5	9586					2.88746e-05	3010.1	775.15	-3.88325	1.13722e-05	4334.8	938.175	-4.62046
202160_at	CREB binding protein (Rubinstein-Taybi syndrome)	CREBBP	1387																	2.36698e-08	7521.33	16120.9	2.14336
211808_s_at	CREB binding protein (Rubinstein-Taybi syndrome)	CREBBP	1387																	0.0136029	#DIV/0!	904.867	#DIV/0!
201990_s_at	cAMP responsive element binding protein-like 2	CREBL2	1389													5.90754e-05	2376.3	937.95	-2.5335	1.0799e-05	2189.35	832.475	-2.62993
225595_at	CREB/ATF bZIP transcription factor	CREBZF	58487																	0.000559311	6989.83	1547.6	-4.51656
225594_at	CREB/ATF bZIP transcription factor	CREBZF	58487																	2.76334e-06	2781.25	1304.97	-2.13127
201200_at	cellular repressor of E1A-stimulated genes 1	CREG1	8804																	2.23659e-11	9043.65	27312	3.02001
207630_s_at	cAMP responsive element modulator	CREM	1390																	0.00288145	1836.3	4255.6	2.31749
230511_at	cAMP responsive element modulator	CREM	1390																	0.00405898	#DIV/0!	1147.25	#DIV/0!
209967_s_at	cAMP responsive element modulator	CREM	1390													7.84806e-05	2411.62	10291.7	4.26755
202552_s_at	cysteine rich transmembrane BMP regulator 1 (chordin-like)	CRIM1	51232																	0.000827998	1313.38	339.975	-3.86315
228496_s_at	Cysteine rich transmembrane BMP regulator 1 (chordin-like)	CRIM1	51232									0.000357539	890.825	415.2	-2.14553	4.62936e-11	1876.08	325.6	-5.7619	2.16397e-07	1969.53	718.2	-2.74231
202551_s_at	cysteine rich transmembrane BMP regulator 1 (chordin-like)	CRIM1	51232									0.000174195	828.567	#DIV/0!	#DIV/0!	5.51503e-05	1427.53	368.2	-3.87706	0.00124681	1809.88	#DIV/0!	#DIV/0!
227942_s_at	cysteine-rich PDZ-binding protein	CRIPT	9419																	1.83131e-07	#DIV/0!	5189.1	#DIV/0!
216314_at	cysteine-rich secretory protein 1	CRISP1	167																	0.00924406	1190.2	379.6	-3.13541
207802_at	cysteine-rich secretory protein 3	CRISP3	10321													3.76333e-06	3234.3	#DIV/0!	#DIV/0!	8.16005e-09	7355.62	#DIV/0!	#DIV/0!
223475_at	cysteine-rich secretory protein LCCL domain containing 1	CRISPLD1	83690																	0.00353532	3125.8	747.7	-4.18055
202224_at	v-crk sarcoma virus CT10 oncogene homolog (avian)	CRK	1398																	9.85359e-09	2584.43	5511.68	2.13265
202225_at	v-crk sarcoma virus CT10 oncogene homolog (avian)	CRK	---																	1.95733e-11	2853.07	6982.77	2.44746
202226_s_at	v-crk sarcoma virus CT10 oncogene homolog (avian)	CRK	1398																	1.44496e-09	#DIV/0!	4811.47	#DIV/0!
212180_at	v-crk sarcoma virus CT10 oncogene homolog (avian)-like	CRKL	1399																	1.67214e-21	3409.23	15130.2	4.438
206184_at	v-crk sarcoma virus CT10 oncogene homolog (avian)-like	CRKL	1399																	0.000169719	#DIV/0!	2071.05	#DIV/0!
211038_s_at	ciliary rootlet coiled-coil, rootletin-like 1	CROCCL1	84809													4.52529e-05	2176.08	1077.6	-2.01937
204573_at	carnitine O-octanoyltransferase	CROT	54677													0.000831724	596.825	247.75	-2.40898	1.26937e-05	1406.52	444.65	-3.16322
221988_at	Cofactor required for Sp1 transcriptional activation, subunit 7, 70kDa	CRSP7	79086																	0.000892259	#DIV/0!	1298.85	#DIV/0!
1555889_a_at	cartilage associated protein	CRTAP	10491																	2.16234e-07	3341.9	1549.8	-2.15634
201380_at	cartilage associated protein	CRTAP	10491													2.95181e-06	622.05	218.7	-2.84431
226307_at	CREB regulated transcription coactivator 2	CRTC2	200186					4.01165e-06	4848.6	11337	2.3382	4.11137e-07	4928.25	12784.6	2.59415	7.57338e-10	2882.23	11112.8	3.85565
218648_at	CREB regulated transcription coactivator 3	CRTC3	64784																	2.09454e-05	3231	1463.05	-2.2084
209674_at	cryptochrome 1 (photolyase-like)	CRY1	1407													2.69782e-09	4059.85	15153.2	3.73244	6.69659e-12	2432.93	12645.6	5.19769
1552347_at	crystallin, zeta (quinone reductase)-like 1	CRYZL1	9946													1.54138e-07	1959.92	928.075	-2.11182
1554767_s_at	crystallin, zeta (quinone reductase)-like 1	CRYZL1	9946					2.50766e-05	558.5	233.525	-2.39161
201161_s_at	cold shock domain protein A	CSDA	8531																	3.90125e-06	#DIV/0!	3468.27	#DIV/0!
219939_s_at	cold shock domain containing E1, RNA-binding	CSDE1	7812																	5.26524e-15	7596.95	26735.9	3.51929
222975_s_at	cold shock domain containing E1, RNA-binding	CSDE1	7812																	2.18861e-16	6915.57	26969.4	3.8998
203104_at	colony stimulating factor 1 receptor, formerly McDonough feline sarcoma viral (v-fms) oncogene homolog	CSF1R	1436													0.000416986	2936.53	882.875	-3.3261
1553297_a_at	colony stimulating factor 3 receptor (granulocyte)	CSF3R	1441																	4.62253e-06	25885.8	53210.1	2.05557
203591_s_at	colony stimulating factor 3 receptor (granulocyte)	CSF3R	1441																	1.5476e-07	15989.5	41470	2.59358
221799_at	chondroitin sulfate glucuronyltransferase	CSGlcA-T	54480													1.0223e-06	3380.93	1600.58	-2.11232
55093_at	chondroitin sulfate glucuronyltransferase	CSGlcA-T	54480									2.38467e-07	5517.3	2706.68	-2.03841
1570169_at	CUB and Sushi multiple domains 2	CSMD2	114784																	0.0143569	991.133	#DIV/0!	#DIV/0!
1553080_at	casein alpha s2-like A	CSN1S2A	286828																	3.78796e-05	1436.55	538.35	-2.66843
207951_at	casein beta	CSN2	1447													0.00762615	849.1	308.633	-2.75116	0.00658921	1567.53	441.75	-3.54844
240221_at	Casein kinase 1, alpha 1	CSNK1A1	1452																	4.52204e-05	1059.53	2268.6	2.14113
213086_s_at	casein kinase 1, alpha 1	CSNK1A1	1452																	1.62347e-11	6696.32	14488.4	2.16364
243338_at	Casein kinase 1, alpha 1	CSNK1A1	---													3.59892e-05	1248.72	2606.4	2.08725	1.26727e-06	1165.08	2685.18	2.30472
208867_s_at	casein kinase 1, alpha 1	CSNK1A1	1452																	3.73249e-06	1733.2	4259.38	2.45752
1556006_s_at	Casein kinase 1, alpha 1	CSNK1A1	1452																	1.32523e-10	1227.5	3252.6	2.64978
213860_x_at	casein kinase 1, alpha 1	CSNK1A1	1452													9.44862e-10	10519.4	22526.8	2.14145	1.39028e-12	8591.3	23712.6	2.76007
208865_at	casein kinase 1, alpha 1	CSNK1A1	1452																	1.40496e-16	6483.43	18925.9	2.91912
1556007_s_at	Casein kinase 1, alpha 1	CSNK1A1	---																	3.88958e-09	2297.8	6770.65	2.94658
206562_s_at	casein kinase 1, alpha 1	CSNK1A1	1452																	1.34409e-10	3041.72	9132.4	3.00238
207945_s_at	casein kinase 1, delta	CSNK1D	1453																	4.93833e-10	2981.15	7668.17	2.57222
227767_at	casein kinase 1, gamma 3	CSNK1G3	1456													3.99132e-08	1879.35	521.875	-3.60115	1.36656e-10	4284.55	857.45	-4.99685
212073_at	casein kinase 2, alpha 1 polypeptide /// casein kinase 2, alpha 1 polypeptide pseudogene	CSNK2A1 /// CSNK2A1P	1457 /// 283106									0.000229457	898.4	#DIV/0!	#DIV/0!
201390_s_at	casein kinase 2, beta polypeptide	CSNK2B	1460 /// 58496																	2.22389e-14	5746.85	17440.6	3.03481
227105_at	centrosome and spindle pole associated protein 1	CSPP1	79848																	0.00127819	585.6	240.9	-2.43088
207030_s_at	cysteine and glycine-rich protein 2	CSRP2	1466																	0.00775596	1717.55	456.233	-3.76463
228543_at	CSRP2 binding protein	CSRP2BP	57325																	0.00458084	554.833	1479.6	2.66675
210140_at	cystatin F (leukocystatin)	CST7	8530																	0.0105842	4867.25	2356.6	-2.06537
204971_at	cystatin A (stefin A)	CSTA	1475																	2.78265e-09	9953.88	26610.9	2.67342
201201_at	cystatin B (stefin B)	CSTB	1476													2.62076e-05	14073.6	49553.8	3.52104	9.89073e-08	11392.8	66969.3	5.8782
202190_at	cleavage stimulation factor, 3' pre-RNA, subunit 1, 50kDa	CSTF1	1477																	6.4858e-05	#DIV/0!	1238.6	#DIV/0!
238821_at	Cleavage stimulation factor, 3' pre-RNA, subunit 2, 64kDa	CSTF2	1478																	0.00378302	699.15	176.15	-3.96906
212905_at	cleavage stimulation factor, 3' pre-RNA, subunit 2, 64kDa, tau variant	CSTF2T	23283													0.00429223	887.95	413.75	-2.1461	0.000969371	949	472.8	-2.00719
229665_at	cleavage stimulation factor, 3' pre-RNA, subunit 3, 77kDa	CSTF3	1479																	3.33662e-09	4362.35	859.575	-5.07501
229666_s_at	cleavage stimulation factor, 3' pre-RNA, subunit 3, 77kDa	CSTF3	1479													2.8985e-06	1503.85	566.225	-2.65592	5.09491e-10	3555.92	801.575	-4.43617
203947_at	cleavage stimulation factor, 3' pre-RNA, subunit 3, 77kDa	CSTF3	1479													1.90984e-07	1497.6	633.267	-2.36488
220957_at	cutaneous T-cell lymphoma-associated antigen 1	CTAGE1	64693																	2.86132e-06	876.45	416.6	-2.10382
204055_s_at	CTAGE family, member 5	CTAGE5	4253													0.000479665	1373.03	586.2	-2.34225	0.000141898	1747.97	850.2	-2.05596
1557714_at	C-terminal binding protein 1	CTBP1	1487																	8.87646e-05	1558.33	429.7	-3.62656
218923_at	chitobiase, di-N-acetyl-	CTBS	1486																	3.326e-09	5264.73	10719.5	2.03609
218924_s_at	chitobiase, di-N-acetyl-	CTBS	1486																	6.62684e-12	8350.77	22874.5	2.7392
1552368_at	CCCTC-binding factor (zinc finger protein)-like	CTCFL	140690																	0.0123955	1217.97	263.1	-4.62929
205035_at	CTD (carboxy-terminal domain, RNA polymerase II, polypeptide A) phosphatase, subunit 1	CTDP1	9150					2.79195e-05	1197.33	2431.82	2.03105									1.07316e-06	#DIV/0!	2791.27	#DIV/0!
224732_at	chromosome transmission fidelity factor 8 homolog (S. cerevisiae)	CTF8	54921																	2.46186e-05	#DIV/0!	3747.43	#DIV/0!
1565620_at	Centaurin, gamma-like family, member 1	CTGLF1	119016													8.91578e-06	2149.95	558.425	-3.85002
221971_x_at	centaurin, gamma-like family, member 1 /// centaurin, gamma-like family, member 6 /// centaurin, gamma-like family, member 9 pseudogene /// centaurin, gamma-like family, member 7 /// centaurin, gamma-like family, member 2	CTGLF1 /// CTGLF2 /// CTGLF6 /// CTGLF7 /// CTGLF9P	119016 /// 399753 /// 642517 /// 728127 /// 729092													1.44164e-07	5336.1	1154.5	-4.622	0.000462404	5474.35	2341.55	-2.33792
221850_x_at	centaurin, gamma-like family, member 1 /// KIAA1975 protein similar to MRIP2 /// centaurin, gamma-like family, member 3 /// centaurin, gamma-like family, member 4 /// centaurin, gamma-like family, member 9 pseudogene /// centaurin, gamma-like family, member 5	CTGLF1 /// CTGLF3 /// CTGLF4 /// CTGLF5 /// CTGLF9P /// KIAA1975	119016 /// 119385 /// 414189 /// 653268 /// 728404													5.23832e-09	6349.25	1431.6	-4.43507
217127_at	cystathionase (cystathionine gamma-lyase)	CTH	1491					0.000498357	319.175	1118.88	3.50552
231794_at	cytotoxic T-lymphocyte-associated protein 4	CTLA4	1493																	0.000176767	933.667	#DIV/0!	#DIV/0!
200764_s_at	catenin (cadherin-associated protein), alpha 1, 102kDa	CTNNA1	1495																	1.43913e-05	1579.3	3173.1	2.00918
210844_x_at	catenin (cadherin-associated protein), alpha 1, 102kDa	CTNNA1	1495																	4.06331e-06	2536.9	5466.95	2.15497
200765_x_at	catenin (cadherin-associated protein), alpha 1, 102kDa	CTNNA1	1495																	3.92042e-07	1491.6	4515.47	3.02727
1558214_s_at	catenin (cadherin-associated protein), alpha 1, 102kDa	CTNNA1	1495													0.000317615	597.625	1454.33	2.43351
205373_at	catenin (cadherin-associated protein), alpha 2	CTNNA2	1496																	0.00870825	1929.88	746.65	-2.58471
223679_at	catenin (cadherin-associated protein), beta 1, 88kDa	CTNNB1	1499																	1.44693e-09	2376.15	6730.83	2.83266
202060_at	Ctr9, Paf1/RNA polymerase II complex component, homolog (S. cerevisiae)	CTR9	9646																	4.92007e-07	3770.68	7785.75	2.06482
214411_x_at	chymotrypsinogen B2	CTRB2	440387																	0.000790563	1129	272.7	-4.14008
206297_at	chymotrypsin C (caldecrin)	CTRC	11330																	0.000241335	1219.12	469.025	-2.59928
200661_at	cathepsin A	CTSA	5476																	1.4752e-07	3229.07	10939.1	3.3877
231234_at	cathepsin C	CTSC	1075													0.000293647	1509.53	623.2	-2.42222	3.23794e-07	1410.08	354.425	-3.97849
201487_at	cathepsin C	CTSC	1075													0.000144911	10749	4125.58	-2.60545
225646_at	cathepsin C	CTSC	1075													0.00450232	5639.73	2754.75	-2.04727
225647_s_at	cathepsin C	CTSC	1075									0.000719346	9469.65	4495.75	-2.10636
200766_at	cathepsin D	CTSD	1509													2.90981e-06	6940.15	20225.2	2.91423	2.24323e-10	4580.15	20984.6	4.58164
227863_at	cathepsin D	CTSD	1509													0.004071	455.5	1428.78	3.13672	3.84901e-08	#DIV/0!	997.5	#DIV/0!
202295_s_at	cathepsin H	CTSH	1512																	0.00468276	2449.07	968.175	-2.52958
203758_at	cathepsin O	CTSO	1519													9.35286e-05	884.925	350.65	-2.52367	0.000840463	1393.78	554.65	-2.51289
232617_at	cathepsin S	CTSS	1520													2.40662e-10	58111.1	13557.7	-4.2862
202901_x_at	cathepsin S	CTSS	1520									0.000173472	19415.6	8462.4	-2.29434	1.52861e-05	22740.3	7790.5	-2.91898
202902_s_at	cathepsin S	CTSS	1520													1.04205e-08	74831.4	27998.8	-2.67266
240868_at	CTTNBP2 N-terminal like	CTTNBP2NL	100129406																	0.00511199	928.433	279.6	-3.32058
227178_at	CUG triplet repeat, RNA binding protein 2	CUGBP2	10659									6.23949e-06	3434.47	1567.88	-2.19053	2.36089e-08	3874.45	1432.88	-2.70397	2.39319e-06	4208.6	1908.12	-2.20562
1554569_a_at	CUG triplet repeat, RNA binding protein 2	CUGBP2	10659					2.95626e-06	6300.3	2557.5	-2.46346
242268_at	CUG triplet repeat, RNA binding protein 2	CUGBP2	10659	4.60815e-06	4054.62	1553.8	-2.60949	0.000141412	5498.62	2625.18	-2.09457
201370_s_at	cullin 3	CUL3	8452																	7.21651e-07	3017.03	1398.95	-2.15664
201424_s_at	cullin 4A	CUL4A	8451																	2.74586e-06	930.45	2313.7	2.48665
210257_x_at	cullin 4B	CUL4B	8450																	2.39352e-07	2128.03	4424.55	2.07918
203533_s_at	cullin 5	CUL5	8065																	3.0731e-05	2389.53	766.125	-3.11898
203531_at	cullin 5	CUL5	8065													9.03736e-08	2905.27	1012.8	-2.86856	2.32637e-07	5163	1866.08	-2.76677
205898_at	chemokine (C-X3-C motif) receptor 1	CX3CR1	1524													0.000417368	2306.65	1069.38	-2.15701	2.22903e-12	8238.17	1230.33	-6.69593
1568934_at	chemokine (C-X3-C motif) receptor 1	CX3CR1	1524																	0.0154977	1448.93	685.2	-2.11461
203917_at	coxsackie virus and adenovirus receptor	CXADR	1525													0.00845168	1068.4	390.4	-2.73668	0.00304321	3143.4	952.5	-3.30016
204470_at	chemokine (C-X-C motif) ligand 1 (melanoma growth stimulating activity, alpha)	CXCL1	2919					0.000124611	18311.8	37820.6	2.06537					1.62949e-06	5810.15	16478.4	2.83614	1.06052e-08	2717.05	10324.7	3.79996
223454_at	chemokine (C-X-C motif) ligand 16	CXCL16	58191																	3.8411e-08	3149.88	10155.3	3.22403
209774_x_at	chemokine (C-X-C motif) ligand 2	CXCL2	2920									0.000458108	2064.7	12680.5	6.14158	2.5842e-05	1220.82	18086	14.8146	2.81126e-06	1465.4	25680.5	17.5246
1569203_at	chemokine (C-X-C motif) ligand 2	CXCL2	2920													0.0135123	#DIV/0!	575.125	#DIV/0!
206336_at	chemokine (C-X-C motif) ligand 6 (granulocyte chemotactic protein 2)	CXCL6	6372					0.000155084	3181.8	1258.22	-2.5288	4.26705e-06	2971.4	909.325	-3.2677	9.08361e-05	1709.72	640.1	-2.67103
203915_at	chemokine (C-X-C motif) ligand 9	CXCL9	4283													0.000333303	650.075	#DIV/0!	#DIV/0!	0.00678341	1133.9	534	-2.12341
211919_s_at	chemokine (C-X-C motif) receptor 4	CXCR4	7852																	1.31416e-06	80561.4	191909	2.38214
209201_x_at	chemokine (C-X-C motif) receptor 4	CXCR4	7852																	5.10287e-08	64055.2	187969	2.93449
232746_at	Chemokine (C-X-C motif) receptor 7	CXCR7	57007																	0.00291079	873.1	418.875	-2.08439
228752_at	chromosome X open reading frame 10	CXorf10	63035																	3.67058e-07	1659.95	491.525	-3.37714
227520_at	chromosome X open reading frame 15	CXorf15	55787													5.75689e-05	1041.95	502.8	-2.0723
239034_at	chromosome X open reading frame 24	CXorf24	203414													6.7037e-06	623.867	251.95	-2.47615
224177_s_at	chromosome X open reading frame 26	CXorf26	51260																	1.64186e-05	1080.07	467.025	-2.31265
223294_at	chromosome X open reading frame 26	CXorf26	51260													0.000306873	1148.97	472.275	-2.43285
230532_at	chromosome X open reading frame 38	CXorf38	159013																	0.00668709	#DIV/0!	2652	#DIV/0!
213315_x_at	chromosome X open reading frame 40A	CXorf40A	91966																	2.90497e-09	2103.85	5207.75	2.47534
214112_s_at	chromosome X open reading frame 40A /// chromosome X open reading frame 40B	CXorf40A /// CXorf40B	541578 /// 91966																	5.1386e-10	2242.25	5246.75	2.33995
212961_x_at	chromosome X open reading frame 40B	CXorf40B	541578 /// 91966																	4.30973e-13	1753.95	5535	3.15573
1552607_at	chromosome X open reading frame 52	CXorf52	100132967 /// 286967													1.34263e-05	884.333	355	-2.49108
1553466_at	chromosome X open reading frame 59	CXorf59	286464													1.21306e-06	671.7	#DIV/0!	#DIV/0!
229774_at	CXXC finger 4	CXXC4	80319																	0.00332336	2453.22	565.233	-4.3402
228906_at	CXXC finger 6	CXXC6	80312																	0.00256871	1287.95	448.425	-2.87216
217200_x_at	cytochrome b-561	CYB561	1534									0.00118074	1249.28	583.925	-2.13944					1.36781e-05	2549.8	1050.23	-2.42784
207986_x_at	cytochrome b-561	CYB561	1534									8.04341e-06	685.525	322.275	-2.12714	2.42626e-07	848.275	381	-2.22644	9.20217e-08	1449.85	657.9	-2.20375
209164_s_at	cytochrome b-561	CYB561	1534									2.44687e-05	1215.85	#DIV/0!	#DIV/0!	8.82409e-06	1219.88	#DIV/0!	#DIV/0!
210816_s_at	cytochrome b-561	CYB561	1534													0.00172143	593.1	#DIV/0!	#DIV/0!
209163_at	cytochrome b-561	CYB561	1534					0.0022621	721.567	#DIV/0!	#DIV/0!	0.00011103	984.875	#DIV/0!	#DIV/0!
201634_s_at	cytochrome b5 type B (outer mitochondrial membrane)	CYB5B	80777													0.000134709	782.65	343.55	-2.27813	1.3251e-06	1149.3	334.5	-3.43587
226833_at	cytochrome b5 domain containing 1	CYB5D1	124637																	0.00206258	#DIV/0!	1150.9	#DIV/0!
202263_at	cytochrome b5 reductase 1	CYB5R1	51706					6.13961e-07	4810.4	2258.12	-2.13026									6.7335e-11	#DIV/0!	6004.18	#DIV/0!
219079_at	cytochrome b5 reductase 4	CYB5R4	51167																	2.20068e-12	8897.55	19419	2.18251
222453_at	cytochrome b reductase 1	CYBRD1	79901									0.000235071	1647.18	355.3	-4.63601	1.3744e-05	1199.77	317.5	-3.77879
217889_s_at	cytochrome b reductase 1	CYBRD1	79901									0.00213627	794.867	#DIV/0!	#DIV/0!
201066_at	cytochrome c-1	CYC1	1537					4.99221e-08	1881.8	4722.32	2.50947	1.56564e-05	1844.65	4266.93	2.31314	1.15245e-08	#DIV/0!	5436.2	#DIV/0!	7.20659e-11	#DIV/0!	7572.72	#DIV/0!
215785_s_at	cytoplasmic FMR1 interacting protein 2	CYFIP2	26999													1.89288e-10	11875	42819.8	3.60588	2.00015e-06	11289	24859.5	2.20209
1570410_at	cytoglobin	CYGB	114757																	4.68472e-11	2535.57	1022.1	-2.48075
213072_at	cysteine/histidine-rich 1	CYHR1	50626																	0.0046575	#DIV/0!	1431.7	#DIV/0!
216809_at	cylicin, basic protein of sperm head cytoskeleton 1	CYLC1	1538																	1.02921e-05	3021.53	502.433	-6.01378
216778_s_at	cylicin, basic protein of sperm head cytoskeleton 1	CYLC1	1538																	0.000542579	768.533	#DIV/0!	#DIV/0!
207780_at	cylicin, basic protein of sperm head cytoskeleton 2	CYLC2	1539																	0.000164964	1562.38	527.9	-2.9596
236694_at	chromosome Y open reading frame 15A	CYorf15A	246126																	0.00194147	948.475	425.4	-2.22961
223645_s_at	chromosome Y open reading frame 15B	CYorf15B	84663													0.0108209	814.4	273.075	-2.98233
240863_at	cytochrome P450, family 19, subfamily A, polypeptide 1	CYP19A1	1588																	0.00764164	1532.67	456.6	-3.35669
207608_x_at	cytochrome P450, family 1, subfamily A, polypeptide 2	CYP1A2	1544													0.00016831	2958.95	1015.3	-2.91436	9.76484e-06	5801.88	1707.72	-3.39743
202435_s_at	cytochrome P450, family 1, subfamily B, polypeptide 1	CYP1B1	1545																	0.00452599	2751.4	#DIV/0!	#DIV/0!
203979_at	cytochrome P450, family 27, subfamily A, polypeptide 1	CYP27A1	1593																	4.55183e-05	#DIV/0!	3043.73	#DIV/0!
217558_at	cytochrome P450, family 2, subfamily C, polypeptide 9	CYP2C9	1559																	0.0149398	1432.17	526.6	-2.71965
214421_x_at	cytochrome P450, family 2, subfamily C, polypeptide 9	CYP2C9	1559													0.00140909	788.9	365.825	-2.1565	0.000206962	1253.82	486.725	-2.57604
244407_at	cytochrome P450, family 39, subfamily A, polypeptide 1	CYP39A1	51302																	0.00719919	1355.33	#DIV/0!	#DIV/0!
217319_x_at	cytochrome P450, family 4, subfamily A, polypeptide 22	CYP4A22	284541													0.00779275	1024.2	389.133	-2.632
206515_at	cytochrome P450, family 4, subfamily F, polypeptide 3	CYP4F3	4051																	0.00549235	3128.15	1521.22	-2.05634
226745_at	cytochrome P450, family 4, subfamily V, polypeptide 2	CYP4V2	285440																	2.4752e-06	1315.33	285.7	-4.6039
227702_at	cytochrome P450, family 4, subfamily X, polypeptide 1	CYP4X1	260293																	0.00790249	638.733	#DIV/0!	#DIV/0!
237395_at	cytochrome P450, family 4, subfamily Z, polypeptide 1	CYP4Z1	199974																	0.00153764	1386.27	#DIV/0!	#DIV/0!
232494_at	cytochrome P450, family 8, subfamily B, polypeptide 1	CYP8B1	1582																	0.000179528	1512.03	454.95	-3.32352
230866_at	cysteinyl leukotriene receptor 1	CYSLTR1	10800									1.0982e-05	5644.1	2262.4	-2.49474	7.825e-08	4998.62	1520.08	-3.28841	8.66956e-06	2331.18	964.75	-2.41635
231747_at	cysteinyl leukotriene receptor 1	CYSLTR1	10800													8.78749e-07	9785.75	3509.73	-2.78818	8.8168e-05	5620.32	2716.75	-2.06877
216288_at	cysteinyl leukotriene receptor 1	CYSLTR1	10800													0.00061661	723.8	326.9	-2.21413
1559471_s_at	D21S2088E	D21S2088E	266917																	0.000401984	2150.63	761.3	-2.82495
216060_s_at	dishevelled associated activator of morphogenesis 1	DAAM1	23002													0.00103624	726.1	262.8	-2.76294	0.000164944	2283.67	562.575	-4.05933
[truncated: 9,482 more rows]
